# Supplementary material for: In situ phosphonium-containing Lewis base-catalyzed 1,6-cyanation reaction: a facile way to obtain α-diaryl and α-triaryl acetonitriles
Source: Royal Society of Chemistry journal article supplement (doi:10.1039/d1qo01501j), 2021-11-11
Supplement: d1qo01501j1.pdf [file d1qo01501j1.pdf]

## SUPPORTING INFORMATION

### ***In situ* phosphonium-containing Lewis base-catalyzed 1,6-cyanation reaction: facile way to $\alpha$ -diaryl and $\alpha$ -triaryl acetonitriles**

Jian-Ping Tan,<sup>a, b, ‡</sup> Yuan Chen,<sup>b, ‡</sup> Xiaoyu Ren,<sup>b,\*</sup> Yumeng Guo,<sup>a</sup> Bing Yi,<sup>a,\*</sup> Hongkui Zhang,<sup>b</sup>  
Guowei Gao,<sup>b</sup> and Tianli Wang<sup>b,\*</sup>

<sup>a</sup> Hunan Province Key Laboratory of Environmental Catalysis and Waste Rechemistry, College of Materials and Chemical Engineering, Hunan Institute of Engineering, Xiangtan, 411104, P. R. China.

<sup>b</sup> Key Laboratory of Green Chemistry & Technology of Ministry of Education, College of Chemistry, Sichuan University, Chengdu 610064, P. R. China. E-mail: [wangtl@scu.edu.cn](mailto:wangtl@scu.edu.cn)

<sup>‡</sup> These authors contributed equally to this work.

|                                                                                                |     |
|------------------------------------------------------------------------------------------------|-----|
| 1. General information -----                                                                   | S2  |
| 2. Optimization of reaction conditions -----                                                   | S3  |
| 3. Preparation of <i>para</i> -quinone methides ( <i>p</i> -QMs) and fuchsones-----            | S5  |
| 4. Representative procedure for synthesis of $\alpha$ -diaryl acetonitriles -----              | S7  |
| 5. Representative procedure for synthesis of $\alpha$ -triary acetonitriles -----              | S18 |
| 6. Attempted enantioselective synthesis of $\alpha$ -diaryl or $\alpha$ -triary nitriles ----- | S22 |
| 7. Gram-scale synthesis and elaboration of reaction products -----                             | S27 |
| 8. Experimental studies on mechanism and proposed reaction pathway-----                        | S33 |
| 9. References -----                                                                            | S36 |
| 10. NMR spectra -----                                                                          | S37 |

## 1. General Information

All the starting materials were obtained from commercial sources and used without further purification unless otherwise stated.  $^1\text{H}$  and  $^{13}\text{C}$  NMR spectra were recorded at ambient temperature in  $\text{CDCl}_3$  on a Bruker Advance ((400 MHz) spectrometer. The chemical shifts are reported in parts permillion (ppm) relative to  $\text{CDCl}_3$  ( $\delta = 7.26$ ) for  $^1\text{H}$ -NMR and relative to the central resonances of  $\text{CDCl}_3$  ( $\delta = 77.16$ ) for  $^{13}\text{C}$ -NMR; Multiplicity was indicated as follows: s (singlet), d (doublet), t (triplet), q (quartet), m (multiplet), dd (doublet of doublet), dt (doublet of triplet), br s (broad singlet). Coupling constants ( $J$ ) were reported in Hertz (Hz). All high resolution mass (ESI-MS) were obtained on Thermo LTQ mass spectrometer. For thin layer chromatography (TLC) was performed using commercially prepared and compounds were visualized with a UV light at 254 nm. Further visualization was achieved by staining with iodine, or ceric ammonium molybdate followed by heating on a hot plate. Flash chromatographic separations were performed on commercially prepared 200-300 mesh silicagel. Enantiomeric excess was determined by HPLC analysis using chiral column described below in detail.

All *para*-quinone methides **1** were synthesized following the known methods reported in the literature.<sup>[1]</sup> and the fuchsones were synthesized following the known methods reported in the literature.<sup>[2]</sup> All the achiral organophosphine catalysts **P1-P8** and electrophilic reagent **E1-E4** used in this study were commercially available and known compounds.

## 2. Optimization of Reaction Conditions

**Table S1.** The remote 1,6-cyanation of *para*-Quinone Methides with TMSCN by *in situ* phosphonium salts: screening of the catalyst<sup>[a]</sup>

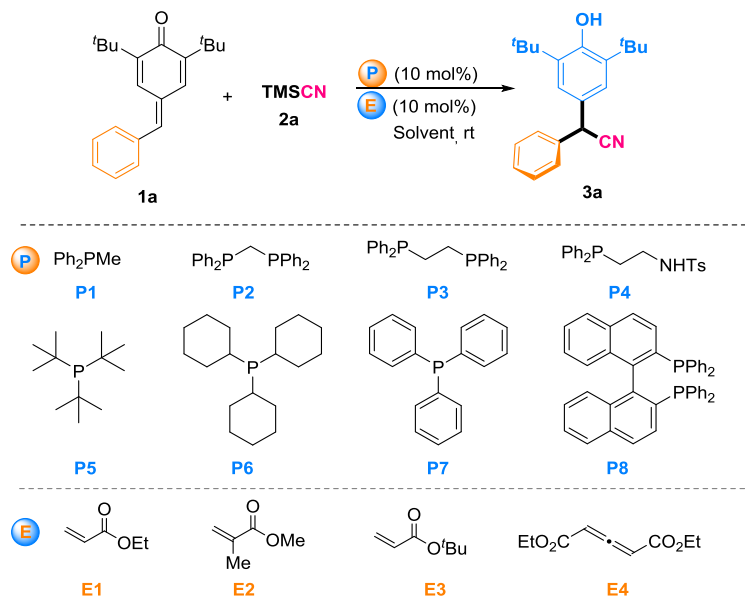

| Entry     | <b>P</b>  | <b>E</b>  | Solvent                 | Time[h]   | yield <sup>[b]</sup> (%) |
|-----------|-----------|-----------|-------------------------|-----------|--------------------------|
| 1         | P1        | E1        | CHCl <sub>3</sub>       | 12        | 65                       |
| 2         | P2        | E1        | CHCl <sub>3</sub>       | 12        | 76                       |
| 3         | P3        | E1        | CHCl <sub>3</sub>       | 12        | 74                       |
| 4         | P4        | E1        | CHCl <sub>3</sub>       | 12        | 32                       |
| 5         | P5        | E1        | CHCl <sub>3</sub>       | 12        | 86                       |
| 6         | P6        | E1        | CHCl <sub>3</sub>       | 12        | 94                       |
| 7         | P7        | E1        | CHCl <sub>3</sub>       | 12        | trace                    |
| 8         | P8        | E1        | CHCl <sub>3</sub>       | 12        | trace                    |
| 9         | P6        | E2        | CHCl <sub>3</sub>       | 12        | 55                       |
| <b>10</b> | <b>P6</b> | <b>E3</b> | <b>CHCl<sub>3</sub></b> | <b>12</b> | <b>98</b>                |
| 11        | P6        | E4        | CHCl <sub>3</sub>       | 24        | NR                       |

<sup>[a]</sup> Reaction conditions: **1a** (0.10 mmol), **2a** (0.2 mmol) and **P** (10 mol%), **E** (10 mol%) and in CHCl<sub>3</sub> (1.0 mL) at room temperature; <sup>[b]</sup> Yields of isolated products of **3a**.

**Table S2.** The remote 1,6-cyanation of *para*-Quinone Methides with TMSCN by *in situ* phosphonium salts: screening of the solvent<sup>[a]</sup>

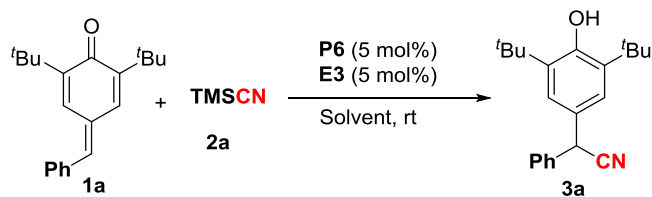

| Entry             | P  | E  | Solvent                         | Time[h] | yield <sup>[b]</sup> (%) |
|-------------------|----|----|---------------------------------|---------|--------------------------|
| 1                 | P6 | E3 | CHCl <sub>3</sub>               | 12      | 98                       |
| 2                 | P6 | E3 | CH <sub>2</sub> Cl <sub>2</sub> | 12      | 89                       |
| 3                 | P6 | E3 | Et <sub>2</sub> O               | 12      | 91                       |
| 4                 | P6 | E3 | Hexane                          | 12      | 88                       |
| 5                 | P6 | E3 | PE                              | 12      | 83                       |
| 6                 | P6 | E3 | Toluene                         | 12      | 75                       |
| 7                 | P6 | E3 | EA                              | 12      | 79                       |
| 8                 | P6 | E3 | THF                             | 12      | 82                       |
| 9                 | P6 | E3 | CH <sub>3</sub> CN              | 12      | 56                       |
| 10                | P6 | E3 | MeOH                            | 12      | NR                       |
| 11 <sup>[c]</sup> | P6 | E3 | CHCl <sub>3</sub>               | 24      | 98                       |

<sup>[a]</sup> Reaction conditions: **1a** (0.10 mmol), **2a** (0.2 mmol) and P (10 mol%), E 10 mol%) and in indicated solvent (1.0 mL) at rt for 24 h; <sup>[b]</sup> Yields of isolated products of **3a**. <sup>[c]</sup> Reaction at 5 mol % P<sub>6</sub> and 5 mol % E<sub>3</sub>.

**Table S3.** The remote 1,6-cyanation of fuchsones with TMSCN by *in situ* phosphonium salts: Screening of the solvent and temperature<sup>[a]</sup>

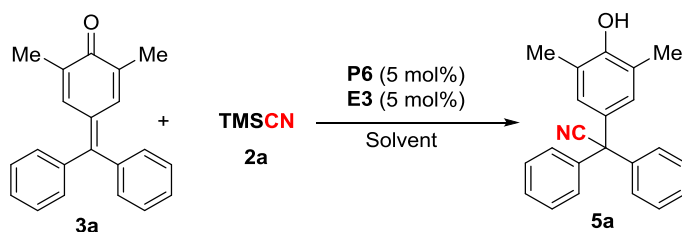

| Entry | P  | E  | Solvent                         | Time[h] | yield <sup>[b]</sup> (%) |
|-------|----|----|---------------------------------|---------|--------------------------|
| 1     | P6 | E3 | CHCl <sub>3</sub>               | 24      | 72                       |
| 2     | P6 | E3 | CH <sub>2</sub> Cl <sub>2</sub> | 24      | 62                       |

|                        |           |           |                         |           |           |
|------------------------|-----------|-----------|-------------------------|-----------|-----------|
| 3                      | P6        | E3        | Et <sub>2</sub> O       | 24        | 55        |
| 4                      | P6        | E3        | Hexane                  | 24        | 23        |
| 5                      | P6        | E3        | PE                      | 24        | 58        |
| 6                      | P6        | E3        | Toluene                 | 24        | 61        |
| <b>7<sup>[c]</sup></b> | <b>P6</b> | <b>E3</b> | <b>CHCl<sub>3</sub></b> | <b>24</b> | <b>87</b> |
| 8 <sup>[d]</sup>       | P6        | E3        | CHCl <sub>3</sub>       | 24        | 82        |

<sup>[a]</sup> Reaction conditions: **1a** (0.10 mmol), **2a** (0.2 mmol) and P<sub>6</sub> (5 mol%), E<sub>3</sub> (5 mol%) and in indicated solvent (1.0 mL) at rt for 24 h; <sup>[b]</sup> Yields of isolated products of **3a**; <sup>[c]</sup> Reaction run at 45 °C for 24 h; <sup>[d]</sup> Reaction run at 60 °C for 24 h.

### 3. Preparation of *para*-Quinone Methides (*p*-QMs) and fuchsones.

All the *para*-quinonemethides (*p*-QMs) were synthesized using the method as reported previously in the literature<sup>[1]</sup> from the corresponding aldehydes with 2,6-*tert*-butyl phenol as shown in *Scheme S1*.

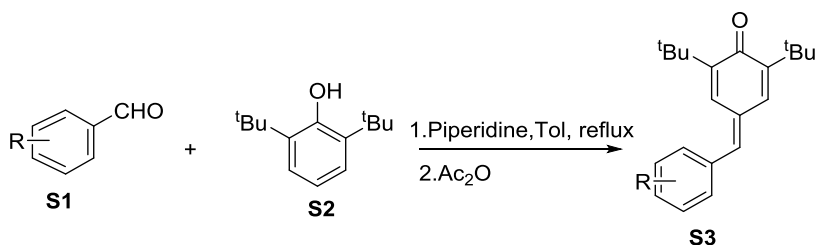

*Scheme S1.* The route for synthesis of *para*-quinonemethides

Fuchsones were synthesized using the method as reported previously in the literature<sup>[2]</sup> as shown in *Scheme S2*. and **4a**, **4d**, **4e**, **4g** are known compounds. The unknown compounds **4b**, **4c**, **4f** were fully characterized.

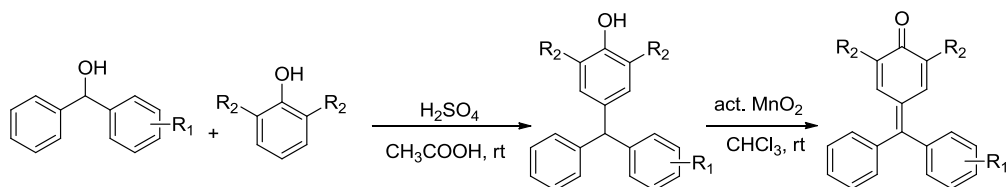

*Scheme S2.* The route for synthesis of fuchsones.

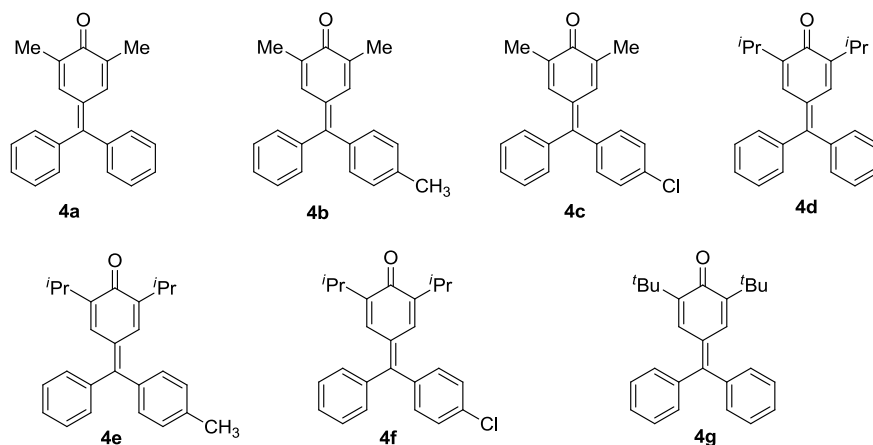

**Figure S1.** Substrates of fuchsones in this study

**2,6-dimethyl-4-(phenyl(p-tolyl)methylene)cyclohexa-2,5-dienone (4b)**

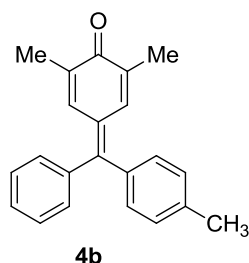

A yellow solid;  $^1\text{H}$  NMR (400 MHz,  $\text{CDCl}_3$ )  $\delta$  7.47-7.38 (m, 3H), 7.25-7.20 (m, 4H), 7.18 (dd,  $J = 2.6, 1.3$  Hz, 1H), 7.14-7.11 (m, 2H), 7.10 (s, 1H), 2.42 (s, 3H), 2.02 (d,  $J = 1.2$  Hz, 3H), 2.01 (d,  $J = 1.2$  Hz, 3H);  $^{13}\text{C}$  NMR (100 MHz,  $\text{CDCl}_3$ )  $\delta$  187.21, 157.04, 140.83, 139.82, 137.83, 135.75, 135.58, 132.17, 132.13, 129.62, 129.34, 128.87, 128.06, 21.44, 16.76; HRMS (ESI)  $m/z$  calcd for  $\text{C}_{22}\text{H}_{20}\text{O}$   $[\text{M}+\text{H}]^+ = 301.1592$ , found = 301.1594.

**4-((4-chlorophenyl)(phenyl)methylene)-2,6-dimethylcyclohexa-2,5-dienone (4c)**

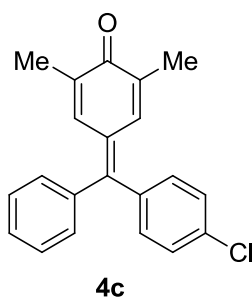

A yellow solid;  $^1\text{H}$  NMR (400 MHz,  $\text{CDCl}_3$ )  $\delta$  7.46-7.36 (m, 5H), 7.20 (dd,  $J = 7.6, 1.2$  Hz, 2H), 7.16 (d,  $J = 8.4$  Hz, 2H), 7.11 (d,  $J = 8.4$  Hz, 2H), 2.02 (s, 3H), 2.00 (s, 3H);  $^{13}\text{C}$  NMR (100 MHz,  $\text{CDCl}_3$ )  $\delta$  187.27, 154.89, 140.37, 139.17, 136.18, 135.47, 135.13, 133.37, 132.14, 130.26, 129.67, 128.60, 128.37, 16.90; HRMS (ESI)  $m/z$

calcd for C<sub>21</sub>H<sub>17</sub>ClO [M+H]<sup>+</sup> = 321.1046, found = 321.1048.

**4-((4-chlorophenyl)(phenyl)methylene)-2,6-diisopropylcyclohexa-2,5-dienone (4f)**

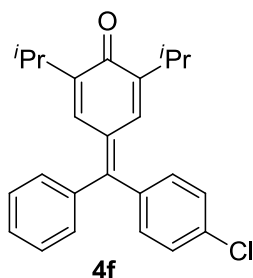

A yellow solid; <sup>1</sup>H NMR (400 MHz, CDCl<sub>3</sub>) δ 7.48-7.37 (m, 5H), 7.24-7.20 (m, 2H), 7.20-7.15 (m, 2H), 7.07 (dd, *J* = 8.4, 2.8 Hz, 2H), 3.25-3.09 (m, 2H), 1.07 (d, *J* = 7.0 Hz, 6H), 1.05 (d, *J* = 7.0 Hz, 6H); <sup>13</sup>C NMR (100 MHz, CDCl<sub>3</sub>) δ 185.11, 154.86, 146.09, 140.46, 139.26, 135.72, 133.49, 132.24, 131.71, 131.32, 129.67, 128.52, 128.28, 26.97, 22.14; HRMS (ESI) *m/z* calcd for C<sub>25</sub>H<sub>25</sub>ClO [M+H]<sup>+</sup> = 377.1672, found = 377.1673.

**4. Representative procedure for synthesis of α-diaryl acetonitriles**

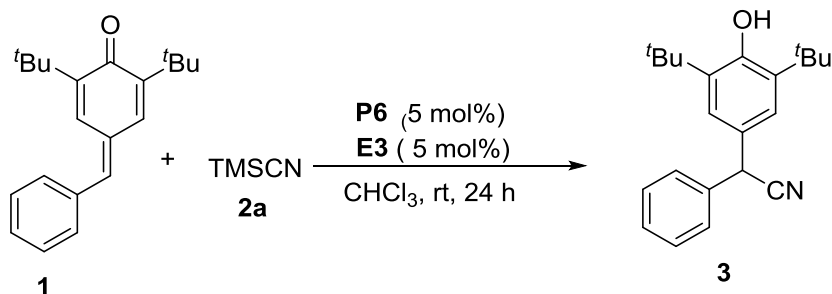

To a dried round bottle flask with a magnetic stirring bar were added **P6** (5 mol%), **E3** (5 mol%) in CHCl<sub>3</sub> (1.0 mL) and then *para*-Quinone Methide **1** (29.4 mg, 0.1 mmol) and TMSCN (20 mg, 0.2 mmol) were added, The reaction mixture was stirred at rt for 24 h, and TLC show that the reaction was completed. Then, 1M TFA was added to the mixture, and stirred for 5 mins, The resulting solution was quenched by Na<sub>2</sub>CO<sub>3</sub> (aq.) and was extracted with CH<sub>2</sub>Cl<sub>2</sub> (3×10 mL). Then the combined organic phases were washed with brine and dried over anhydrous Na<sub>2</sub>SO<sub>4</sub>. The solvent was removed to give the crude product which was purified by flash column chromatography (PE/ethyl acetate = 80/1 to 10/1) to afford the desired compounds **3a**

as yellow solid.

**2-(3,5-di-tert-butyl-4-hydroxyphenyl)-2-phenylacetonitrile (3a)**

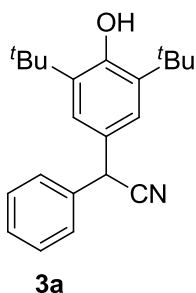

A yellow solid;  $^1\text{H}$  NMR (400 MHz,  $\text{CDCl}_3$ )  $\delta$  7.34-7.27 (m, 4H), 7.21 (s, 1H), 7.05 (s, 2H), 5.20 (s, 1H), 5.02 (s, 1H), 1.36 (s, 18H);  $^{13}\text{C}$  NMR (100 MHz,  $\text{CDCl}_3$ )  $\delta$  153.79, 136.67, 136.58, 129.19, 128.12, 127.81, 126.63, 124.63, 120.48, 42.67, 34.58, 30.28. HRMS (ESI)  $m/z$  calcd for  $\text{C}_{22}\text{H}_{27}\text{NO}$   $[\text{M}-\text{H}]^- = 320.2014$ , found = 320.2015.

**2-(3,5-di-tert-butyl-4-hydroxyphenyl)-2-(2-fluorophenyl)acetonitrile (3b)**

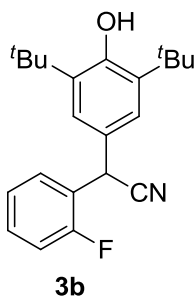

A pale yellow solid;  $^1\text{H}$  NMR (400 MHz,  $\text{CDCl}_3$ )  $\delta$  7.46 (td,  $J = 7.6, 1.6$  Hz, 1H), 7.36-7.28 (m, 1H), 7.19 (td,  $J = 7.6, 1.2$  Hz, 1H), 7.16 (s, 2H), 7.13-7.05 (m, 1H), 5.36 (s, 1H), 5.26 (s, 1H), 1.41 (s, 18H);  $^{13}\text{C}$  NMR (100 MHz,  $\text{CDCl}_3$ )  $\delta$  153.86, 136.78, 130.18 (d,  $J = 8.2$  Hz), 129.29 (d,  $J = 3.0$  Hz), 125.38, 124.99, 124.96, 124.42, 119.66, 116.17, 115.95, 36.12, 34.58, 30.26.; HRMS (ESI)  $m/z$  calcd for  $\text{C}_{22}\text{H}_{26}\text{FNO}$   $[\text{M}-\text{H}]^- = 338.1920$ , found = 338.1928.

**2-(3,5-di-tert-butyl-4-hydroxyphenyl)-2-(2-chlorophenyl)acetonitrile (3c)**

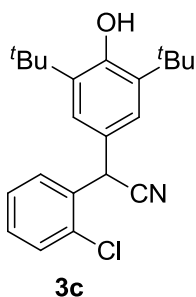



A yellow solid;  $^1\text{H}$  NMR (400 MHz,  $\text{CDCl}_3$ )  $\delta$  7.52 (dd,  $J = 7.6, 1.6$  Hz, 1H), 7.42 (dd,  $J = 8.0, 1.6$  Hz, 1H), 7.32 (td,  $J = 7.6, 1.6$  Hz, 1H), 7.29 (dd,  $J = 7.6, 2.0$  Hz, 1H), 7.16 (s, 2H), 5.55 (s, 1H), 5.26 (s, 1H), 1.41 (s, 18H);  $^{13}\text{C}$  NMR (100 MHz,  $\text{CDCl}_3$ )  $\delta$  153.86, 136.71, 134.59, 133.22, 130.18, 129.69, 129.67, 127.81, 125.17, 124.65, 119.93, 39.48, 34.58, 30.27; HRMS (ESI)  $m/z$  calcd for  $\text{C}_{22}\text{H}_{26}\text{ClNO}$   $[\text{M}-\text{H}]^- = 354.1625$ , found = 354.1631.

**2-(3,5-di-tert-butyl-4-hydroxyphenyl)-2-(2-bromophenyl)acetonitrile (3d)**

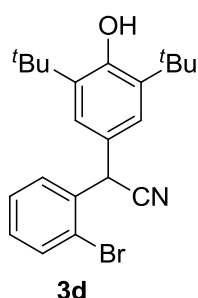

A yellow solid;  $^1\text{H}$  NMR (400 MHz,  $\text{CDCl}_3$ )  $\delta$  7.60 (dd,  $J = 8.0, 1.2$  Hz, 1H), 7.52 (dd,  $J = 7.8, 1.6$  Hz, 1H), 7.36 (td,  $J = 7.6, 1.2$  Hz, 1H), 7.20 (dd,  $J = 7.6, 1.6$  Hz, 1H), 7.17 (s, 2H), 5.56 (s, 1H), 5.26 (s, 1H), 1.41 (s, 18H);  $^{13}\text{C}$  NMR (100 MHz,  $\text{CDCl}_3$ )  $\delta$  153.86, 136.71, 136.34, 133.51, 129.92, 129.88, 128.47, 125.25, 124.67, 123.68, 119.99, 41.95, 34.60, 30.28; HRMS (ESI)  $m/z$  calcd for  $\text{C}_{22}\text{H}_{26}\text{BrNO}$   $[\text{M}-\text{H}]^- = 398.1120$ , found = 398.1120.

**2-(3,5-di-tert-butyl-4-hydroxyphenyl)-2-o-tolylacetonitrile (3e)**

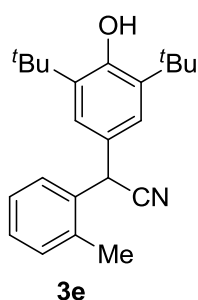

A orange gummy solid;  $^1\text{H}$  NMR (400 MHz,  $\text{CDCl}_3$ )  $\delta$  7.42 (dd,  $J = 6.0, 4.8$  Hz, 1H), 7.29-7.27 (m, 2H), 7.25-7.18 (m, 1H), 7.06 (s, 2H), 5.25 (s, 1H), 5.21 (s, 1H), 2.34 (s, 3H), 1.41 (s, 18H);  $^{13}\text{C}$  NMR (100 MHz,  $\text{CDCl}_3$ )  $\delta$  153.66, 136.65, 135.92, 134.43, 131.19, 128.53, 128.40, 126.89, 125.54, 124.68, 120.51, 39.80, 34.55, 30.28, 19.67; HRMS (ESI)  $m/z$  calcd for  $\text{C}_{23}\text{H}_{29}\text{NO}$   $[\text{M}-\text{H}]^- = 334.2171$ , found = 334.2155.

**2-(3,5-di-tert-butyl-4-hydroxyphenyl)-2-(2-methoxyphenyl)acetonitrile (3f)**

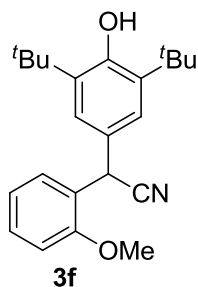

A orange gummy solid;  $^1\text{H}$  NMR (400 MHz,  $\text{CDCl}_3$ )  $\delta$  7.37-7.27 (m, 2H), 7.19 (s, 2H), 6.97 (td,  $J = 7.6, 0.8$  Hz, 1H), 6.91 (d,  $J = 8.0$  Hz, 1H), 5.47 (s, 1H), 5.22 (s, 1H), 3.88 (s, 3H), 1.42 (s, 18H);  $^{13}\text{C}$  NMR (100 MHz,  $\text{CDCl}_3$ )  $\delta$  156.21, 153.50, 136.42, 129.49, 128.78, 126.24, 125.45, 124.67, 121.16, 120.77, 111.01, 55.68, 36.31, 34.54, 30.32; HRMS (ESI)  $m/z$  calcd for  $\text{C}_{23}\text{H}_{29}\text{NO}_2$   $[\text{M}-\text{H}]^- = 350.2120$ , found = 350.2108.

**2-(3,5-di-tert-butyl-4-hydroxyphenyl)-2-(3-fluorophenyl)acetonitrile (3g)**

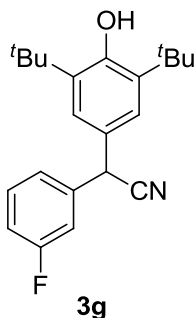

A orange gummy solid;  $^1\text{H}$  NMR (400 MHz,  $\text{CDCl}_3$ )  $\delta$  7.40-7.31 (m, 1H), 7.17 (d,  $J = 7.8$  Hz, 1H), 7.08 (s, 2H), 7.07-6.98 (m, 2H), 5.29 (s, 1H), 5.05 (s, 1H), 1.41 (s, 18H);  $^{13}\text{C}$  NMR (100 MHz,  $\text{CDCl}_3$ )  $\delta$  154.00, 138.94 (d,  $J = 7.6$  Hz), 136.94, 130.77 (d,  $J = 8.4$  Hz), 125.92, 124.61, 123.46 (d,  $J = 3.0$  Hz), 119.92, 115.35, 115.14, 114.91, 42.34, 34.59, 30.26; HRMS (ESI)  $m/z$  calcd for  $\text{C}_{22}\text{H}_{26}\text{FNO}$   $[\text{M}-\text{H}]^- = 338.1920$ , found = 338.1923.

**2-(3,5-di-tert-butyl-4-hydroxyphenyl)-2-(3-chlorophenyl)acetonitrile (3h)**

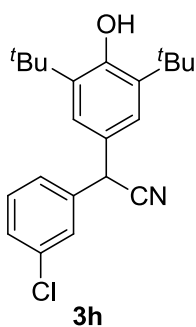

A yellow solid;  $^1\text{H}$  NMR (400 MHz,  $\text{CDCl}_3$ )  $\delta$  7.34 (s, 1H), 7.33-7.29 (m, 2H), 7.28-7.27(m, 1H), 7.08 (s, 2H), 5.29 (s, 1H), 5.02 (s, 1H), 1.41 (s, 18H);  $^{13}\text{C}$  NMR (100 MHz,  $\text{CDCl}_3$ )  $\delta$  154.03, 138.48, 136.96, 135.08, 130.44, 128.46, 128.00, 125.95, 125.85, 124.61, 119.85, 42.32, 34.60, 30.26; HRMS(ESI)  $m/z$  calcd for  $\text{C}_{22}\text{H}_{26}\text{ClNO}$   $[\text{M-H}]^- = 354.1625$ , found = 354.1627.

**2-(3,5-di-tert-butyl-4-hydroxyphenyl)-2-(3-bromophenyl)acetonitrile (3i)**

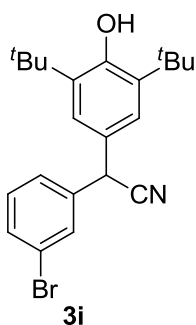

A yellow solid;  $^1\text{H}$  NMR (400 MHz,  $\text{CDCl}_3$ )  $\delta$  7.50 (dd,  $J = 2.0, 1.6$  Hz, 1H), 7.46 (dt,  $J = 7.6, 1.6$  Hz, 1H), 7.31 (d,  $J = 7.6$  Hz, 1H), 7.24 (d,  $J = 7.6$  Hz, 1H), 7.08 (s, 2H), 5.29 (s, 1H), 5.02 (s, 1H), 1.41 (s, 18H);  $^{13}\text{C}$  NMR (100 MHz,  $\text{CDCl}_3$ )  $\delta$  154.03, 138.71, 136.96, 131.39, 130.87, 130.71, 126.42, 125.83, 124.60, 123.19, 119.82, 42.26, 34.60, 30.26; HRMS (ESI)  $m/z$  calcd for  $\text{C}_{22}\text{H}_{26}\text{BrNO}$   $[\text{M-H}]^- = 398.1120$ , found = 398.1121.

**2-(3,5-di-tert-butyl-4-hydroxyphenyl)-2-m-tolylacetonitrile (3j)**

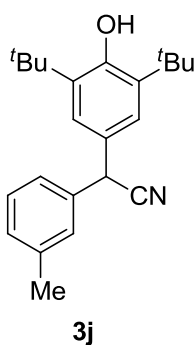

A orange gummy solid;  $^1\text{H}$  NMR (400 MHz,  $\text{CDCl}_3$ )  $\delta$  7.30-7.27 (m, 1H), 7.22 (s, 1H), 7.18-7.13 (m, 2H), 7.13 (s, 2H), 5.27 (s, 1H), 5.04 (s, 1H), 2.38 (s, 3H), 1.43 (s, 18H);  $^{13}\text{C}$  NMR (100 MHz,  $\text{CDCl}_3$ )  $\delta$  153.75, 139.01, 136.70, 136.44, 129.04, 128.88, 128.44, 126.74, 124.85, 124.59, 120.60, 42.63, 34.57, 30.28, 21.57; HRMS (ESI)  $m/z$  calcd for  $\text{C}_{23}\text{H}_{29}\text{NO}$   $[\text{M}-\text{H}]^- = 334.2179$ , found = 334.2171.

**2-(3,5-di-tert-butyl-4-hydroxyphenyl)-2-(3-methoxyphenyl)acetonitrile (3k)**

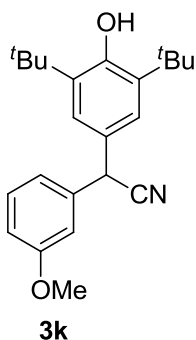

A orange gummy solid;  $^1\text{H}$  NMR (400 MHz,  $\text{CDCl}_3$ )  $\delta$  7.29 (dd,  $J = 8.0, 8.0$  Hz, 1H), 7.11 (s, 2H), 6.95 (dd,  $J = 7.6, 0.8$  Hz, 1H), 6.89 (dd,  $J = 2.4, 1.6$  Hz, 1H), 6.85 (dd,  $J = 8.0, 2.0$  Hz, 1H), 5.25 (s, 1H), 5.02 (s, 1H), 3.80 (s, 3H), 1.41 (s, 18H);  $^{13}\text{C}$  NMR (100 MHz,  $\text{CDCl}_3$ )  $\delta$  160.15, 153.82, 138.03, 136.76, 130.21, 126.46, 124.61, 120.40, 120.12, 113.71, 113.43, 55.46, 42.65, 34.57, 30.29; HRMS (ESI)  $m/z$  calcd for  $\text{C}_{23}\text{H}_{29}\text{NO}_2$   $[\text{M}-\text{H}]^- = 350.2120$ , found = 350.2127.

**2-(3,5-di-tert-butyl-4-hydroxyphenyl)-2-(4-fluorophenyl)acetonitrile (3l)**

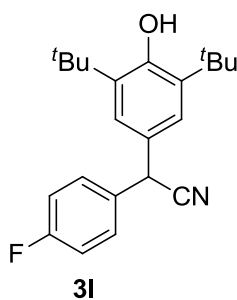

A orange solid;  $^1\text{H}$  NMR (400 MHz,  $\text{CDCl}_3$ )  $\delta$  7.32 (dd,  $J = 8.8, 5.2$  Hz, 2H), 7.10-7.02 (m, 4H), 5.27 (s, 1H), 5.05 (s, 1H), 1.41 (s, 18H);  $^{13}\text{C}$  NMR (100 MHz,  $\text{CDCl}_3$ )  $\delta$  162.49 (d,  $J = 245.4$  Hz), 153.90, 136.89, 132.41, 129.54 (d,  $J = 8.4$  Hz), 126.38, 124.55, 120.28, 116.15 (d,  $J = 21.8$  Hz), 41.93, 34.59, 30.27; HRMS (ESI)  $m/z$  calcd for  $\text{C}_{22}\text{H}_{26}\text{FNO}$   $[\text{M}-\text{H}]^- = 338.1920$ , found = 338.1926.

**2-(3,5-di-tert-butyl-4-hydroxyphenyl)-2-(4-chlorophenyl)acetonitrile (3m)**

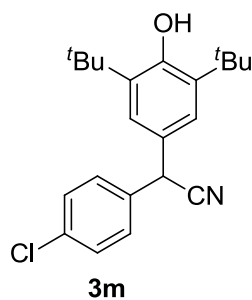

A orange solid;  $^1\text{H}$  NMR (400 MHz,  $\text{CDCl}_3$ )  $\delta$  7.38-7.32 (m, 2H), 7.31-7.27 (m, 2H), 7.07 (s, 2H), 5.28 (s, 1H), 5.03 (s, 1H), 1.41 (s, 18H);  $^{13}\text{C}$  NMR (100 MHz,  $\text{CDCl}_3$ )  $\delta$  153.83, 136.82, 135.03, 134.05, 129.24, 129.02, 125.99, 124.42, 119.90, 41.97, 34.46, 30.13; HRMS (ESI)  $m/z$  calcd for  $\text{C}_{22}\text{H}_{26}\text{ClNO}$   $[\text{M}-\text{H}]^- = 354.1625$ , found = 354.1631.

**2-(3,5-di-tert-butyl-4-hydroxyphenyl)-2-(4-bromophenyl)acetonitrile (3n)**

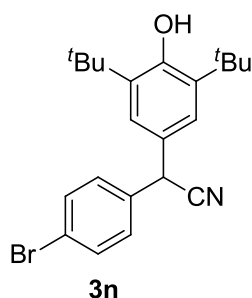

A orange solid;  $^1\text{H}$  NMR (400 MHz,  $\text{CDCl}_3$ )  $\delta$  7.50 (d,  $J = 8.4$  Hz, 2H), 7.23 (d,  $J = 8.4$  Hz, 2H), 7.06 (s, 2H), 5.28 (s, 1H), 5.01 (s, 1H), 1.41 (s, 18H);  $^{13}\text{C}$  NMR (100 MHz,  $\text{CDCl}_3$ )  $\delta$  153.97, 136.96, 135.71, 132.34, 129.46, 126.03, 124.55, 122.27, 119.94, 42.19, 34.59, 30.27; HRMS (ESI)  $m/z$  calcd for  $\text{C}_{22}\text{H}_{26}\text{BrNO}$   $[\text{M}-\text{H}]^- = 398.1120$ , found = 398.1124.

**2-(3,5-di-tert-butyl-4-hydroxyphenyl)-2-p-tolylacetonitrile (3o)**

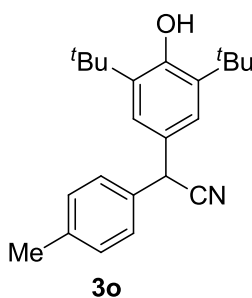

A orange solid;  $^1\text{H}$  NMR (400 MHz,  $\text{CDCl}_3$ )  $\delta$  7.24 (d,  $J = 8.0$  Hz, 2H), 7.17 (d,  $J = 8.0$  Hz, 2H), 7.09 (s, 2H), 5.23 (s, 1H), 5.02 (s, 1H), 2.34 (s, 3H), 1.40 (s, 18H);  $^{13}\text{C}$

NMR (100 MHz, CDCl<sub>3</sub>)  $\delta$  153.73, 137.90, 136.71, 133.66, 129.84, 127.64, 126.85, 124.56, 120.64, 42.35, 34.57, 30.29, 21.21; HRMS (ESI)  $m/z$  calcd for C<sub>23</sub>H<sub>29</sub>NO [M-H]<sup>-</sup> = 334.2171, found = 334.2169.

**2-(3,5-di-tert-butyl-4-hydroxyphenyl)-2-(4-methoxyphenyl)acetonitrile (3p)**

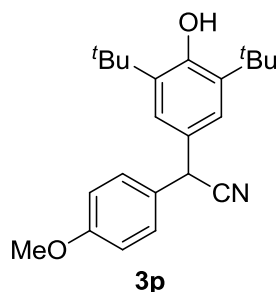

A orange solid; <sup>1</sup>H NMR (400 MHz, CDCl<sub>3</sub>)  $\delta$  7.24 (d,  $J$  = 4.0 Hz, 2H), 7.08 (s, 2H), 6.91-6.88 (m, 1H), 6.88-6.86 (m, 1H), 5.23 (s, 1H), 5.00 (s, 1H), 3.80 (s, 3H), 1.40 (s, 18H); <sup>13</sup>C NMR (100 MHz, CDCl<sub>3</sub>)  $\delta$  159.39, 153.71, 136.71, 128.95, 128.66, 126.93, 124.53, 120.70, 114.51, 55.47, 41.89, 34.56, 30.29; HRMS (ESI)  $m/z$  calcd for C<sub>23</sub>H<sub>29</sub>NO<sub>2</sub> [M-H]<sup>-</sup> = 350.2120, found = 350.2123.

**4-((3,5-di-tert-butyl-4-hydroxyphenyl)(cyano)methyl)benzonitrile(3q)**

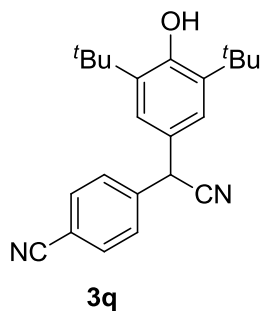

A orange solid; <sup>1</sup>H NMR (400 MHz, CDCl<sub>3</sub>)  $\delta$  7.68 (d,  $J$  = 8.4 Hz, 2H), 7.48 (d,  $J$  = 8.0 Hz, 2H), 7.05 (s, 2H), 5.31 (s, 1H), 5.09 (s, 1H), 1.41 (s, 18H); <sup>13</sup>C NMR (100 MHz, CDCl<sub>3</sub>)  $\delta$  160.40, 154.92, 139.58, 136.83, 127.16, 126.53, 126.26, 126.17, 124.46, 119.62, 38.03, 34.60, 30.28; HRMS (ESI)  $m/z$  calcd for C<sub>23</sub>H<sub>26</sub>N<sub>2</sub>O [M-H]<sup>-</sup> = 345.1967, found = 345.1969.

**2-(3,5-di-tert-butyl-4-hydroxyphenyl)-2-(4-(trifluoromethyl)phenyl)acetonitrile(3r)**

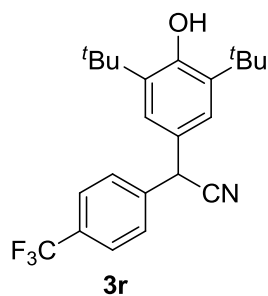

A yellow solid;  $^1\text{H}$  NMR (400 MHz,  $\text{CDCl}_3$ )  $\delta$  7.64 (d,  $J = 8.2$  Hz, 2H), 7.49 (d,  $J = 8.4$  Hz, 2H), 7.08 (s, 2H), 5.30 (s, 1H), 5.11 (s, 1H), 1.41 (s, 18H).;  $^{13}\text{C}$  NMR (100 MHz,  $\text{CDCl}_3$ )  $\delta$  154.11, 140.53 (d,  $J = 8.6$  Hz), 137.11, 134.58, 134.38, 128.17, 126.24 (q,  $J = 3.8$  Hz), 125.70, 124.61, 119.71, 42.53, 34.61, 30.25; HRMS (ESI)  $m/z$  calcd for  $\text{C}_{23}\text{H}_{26}\text{F}_3\text{NO}$   $[\text{M}-\text{H}]^- = 388.1888$ , found = 388.1882.

**2-(3,5-di-tert-butyl-4-hydroxyphenyl)-2-(3,5-dimethylphenyl)acetonitrile (3s)**

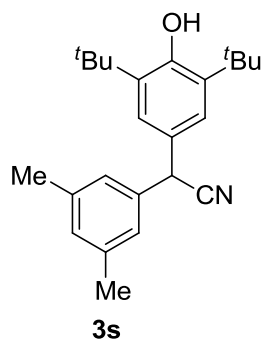

A yellow solid;  $^1\text{H}$  NMR (400 MHz,  $\text{CDCl}_3$ )  $\delta$  7.11 (s, 2H), 6.97 (s, 2H), 6.94 (s, 1H), 5.24 (s, 1H), 4.97 (s, 1H), 2.31 (s, 6H), 1.41 (s, 18H);  $^{13}\text{C}$  NMR (100 MHz,  $\text{CDCl}_3$ )  $\delta$  153.72, 138.84, 136.66, 136.35, 129.75, 126.87, 125.54, 124.56, 120.71, 42.60, 34.58, 30.30, 21.44; HRMS (ESI)  $m/z$  calcd for  $\text{C}_{24}\text{H}_{31}\text{NO}$   $[\text{M}-\text{H}]^- = 348.2327$ , found = 348.2340.

**2-(3,5-di-tert-butyl-4-hydroxyphenyl)-2-(2,4-dichlorophenyl)acetonitrile (3t)**

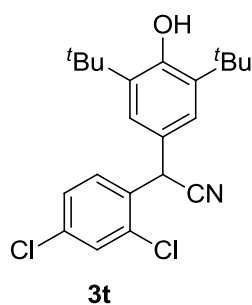

A orange solid;  $^1\text{H}$  NMR (400 MHz,  $\text{CDCl}_3$ )  $\delta$  7.44 (s, 1H), 7.43 (d,  $J = 6.4$  Hz, 1H),

7.30 (dd,  $J = 8.4, 2.0$  Hz, 1H), 7.13 (s, 2H), 5.48 (s, 1H), 5.28 (s, 1H), 1.41 (s, 18H);  $^{13}\text{C}$  NMR (100 MHz,  $\text{CDCl}_3$ )  $\delta$  154.01, 136.90, 134.98, 133.90, 133.34, 130.51, 130.00, 128.16, 124.67, 124.54, 119.45, 39.11, 34.59, 30.25; HRMS (ESI)  $m/z$  calcd for  $\text{C}_{22}\text{H}_{25}\text{Cl}_2\text{NO}$   $[\text{M}-\text{H}]^- = 388.1235$ , found = 388.1228.

**2-(3,5-di-tert-butyl-4-hydroxyphenyl)-2-(naphthalen-1-yl)acetonitrile (3u)**

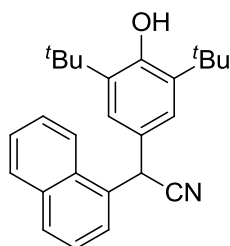

**3u**

A orange solid;  $^1\text{H}$  NMR (400 MHz,  $\text{CDCl}_3$ )  $\delta$  8.02-7.96 (m, 1H), 7.91 (dd,  $J = 7.2, 3.2$  Hz, 1H), 7.87 (d,  $J = 8.2$  Hz, 1H), 7.59 (d,  $J = 6.7$  Hz, 1H), 7.57-7.46 (m, 3H), 7.14 (s, 2H), 5.77 (s, 1H), 5.24 (s, 1H), 1.37 (s, 18H);  $^{13}\text{C}$  NMR (100 MHz,  $\text{CDCl}_3$ )  $\delta$  153.77, 136.70, 134.17, 131.79, 130.63, 129.32, 129.22, 126.99, 126.83, 126.23, 125.69, 125.60, 124.81, 123.20, 120.62, 39.63, 34.56, 30.26; HRMS (ESI)  $m/z$  calcd for  $\text{C}_{26}\text{H}_{29}\text{NO}$   $[\text{M}-\text{H}]^- = 321.2171$ , found = 321.2179.

**2-(3,5-di-tert-butyl-4-hydroxyphenyl)-2-(thiophen-2-yl)acetonitrile (3v)**

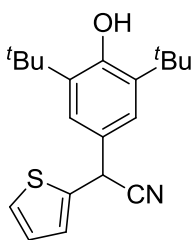

**3v**

A pale yellow solid;  $^1\text{H}$  NMR (400 MHz,  $\text{CDCl}_3$ )  $\delta$  7.27 (d,  $J = 1.2$  Hz, 1H), 7.17 (s, 2H), 7.07 (dd,  $J = 2.4, 1.0$  Hz, 1H), 6.98 (dd,  $J = 4.8, 3.6$  Hz, 1H), 5.29 (s, 1H), 5.27 (s, 1H), 1.43 (s, 18H);  $^{13}\text{C}$  NMR (100 MHz,  $\text{CDCl}_3$ )  $\delta$  154.00, 139.45, 136.71, 127.04, 126.41, 126.12, 126.04, 124.34, 119.49, 37.90, 34.47, 30.16; HRMS (ESI)  $m/z$  calcd for  $\text{C}_{20}\text{H}_{25}\text{NOS}$   $[\text{M}-\text{H}]^- = 326.1579$ , found = 326.1569.



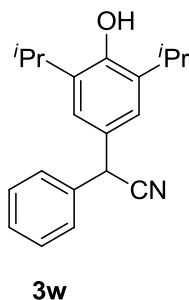

A white solid;  $^1\text{H}$  NMR (400 MHz,  $\text{CDCl}_3$ )  $\delta$  7.39-7.30 (m, 5H), 6.99 (s, 2H), 5.07 (s, 1H), 4.85 (s, 1H), 3.17-3.06 (m, 2H), 1.23 (d,  $J = 7.0$  Hz, 12H);  $^{13}\text{C}$  NMR (100 MHz,  $\text{CDCl}_3$ )  $\delta$  150.07, 136.62, 134.63, 129.20, 128.14, 127.76, 127.74, 123.21, 120.38, 42.51, 27.48, 22.71; HRMS (ESI)  $m/z$  calcd for  $\text{C}_{20}\text{H}_{23}\text{NO}$   $[\text{M}-\text{H}]^- = 292.1701$ , found = 292.1712.

## 5. Representative procedure for synthesis of $\alpha$ -triary acetonitriles

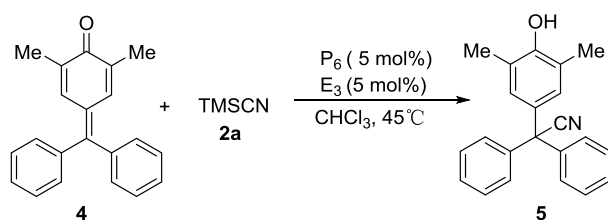

To a dried round bottle flask with a magnetic stirring bar were added **P6** (5 mol%), **E3** (5 mol%) in  $\text{CHCl}_3$  (2.0 mL). then fuchsones (28.6 mg, 0.1 mmol) and TMSCN (20 mg, 0.2 mmol) were added, The reaction mixture was stirred at  $45^\circ\text{C}$  for 24-48 h, and TLC show that the reaction was completed. Then, 1M TFA was added to the mixture, and stirred for 5 mins, The resulting solution was quenched by  $\text{Na}_2\text{CO}_3$  (aq.) and was extracted with  $\text{CH}_2\text{Cl}_2$  ( $3 \times 10$  mL). Then the combined organic phases were washed with brine and dried over anhydrous  $\text{Na}_2\text{SO}_4$ . The solvent was removed to give the crude product which was purified by flash column chromatography (PE/ethyl acetate = 80/1 to 10/1) to afford the desired compounds **5**.

### 2-(4-hydroxy-3,5-dimethylphenyl)-2,2-diphenylacetonitrile (5a)

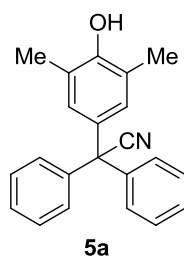

A orange gummy solid;  $^1\text{H}$  NMR (400 MHz,  $\text{CDCl}_3$ )  $\delta$  7.37-3.31 (m, 6H), 7.25 – 7.20 (m, 4H), 6.80 (s, 2H), 4.82 (s, 1H), 2.19 (s, 6H);  $^{13}\text{C}$  NMR (100 MHz,  $\text{CDCl}_3$ )  $\delta$  152.16, 140.76, 131.63, 129.12, 128.91, 128.70, 128.12, 123.98, 123.36, 56.92, 16.23; HRMS (ESI)  $m/z$  calcd for  $\text{C}_{20}\text{H}_{25}\text{NO}$   $[\text{M}-\text{H}]^- = 312.1388$ , found = 312.1374.

**2-(4-hydroxy-3,5-dimethylphenyl)-2-phenyl-2-(p-tolyl)acetonitrile (5b)**

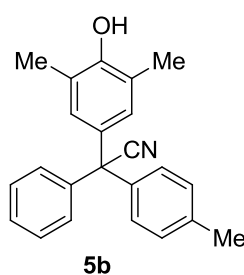

A orange gummy solid;  $^1\text{H}$  NMR (400 MHz,  $\text{CDCl}_3$ )  $\delta$  7.38-7.29 (m, 3H), 7.24-7.19 (m, 2H), 7.15 (d,  $J = 8.2$  Hz, 2H), 7.09 (d,  $J = 8.4$  Hz, 2H), 6.79 (s, 2H), 4.74 (s, 1H), 2.36 (s, 3H), 2.19 (s, 6H);  $^{13}\text{C}$  NMR (100 MHz,  $\text{CDCl}_3$ )  $\delta$  152.07, 140.94, 137.95, 137.80, 131.84, 129.39, 129.10, 128.88, 128.78, 128.66, 128.04, 124.07, 123.26, 56.60, 21.17, 16.22; HRMS (ESI)  $m/z$  calcd for  $\text{C}_{23}\text{H}_{21}\text{NO}$   $[\text{M}-\text{H}]^- = 326.1545$ , found = 326.1547.

**2-(4-chlorophenyl)-2-(4-hydroxy-3,5-dimethylphenyl)-2-phenylacetonitrile (5c)**

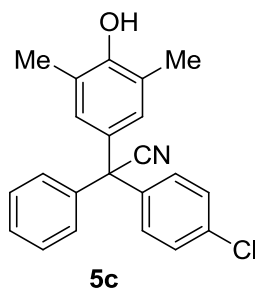

A orange gummy solid;  $^1\text{H}$  NMR (400 MHz,  $\text{CDCl}_3$ )  $\delta$  7.41-7.28 (m, 5H), 7.23-7.12 (m, 4H), 6.77 (s, 2H), 4.78 (s, 1H), 2.19 (s, 6H);  $^{13}\text{C}$  NMR (100 MHz,  $\text{CDCl}_3$ )  $\delta$  152.28, 140.28, 139.42, 134.24, 131.18, 130.32, 129.01, 128.90, 128.86, 128.80,

128.35, 123.59, 123.48, 56.44, 16.23; HRMS (ESI)  $m/z$  calcd for  $C_{22}H_{18}ClNO$   $[M-H]^-$  = 346.0999, found = 346.1002.

**2-(4-hydroxy-3,5-diisopropylphenyl)-2,2-diphenylacetonitrile (5d)**

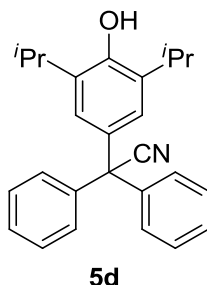

A orange solid;  $^1H$  NMR (400 MHz,  $CDCl_3$ )  $\delta$  7.39-7.30 (m, 6H), 7.24-7.18 (m, 4H), 6.84 (s, 2H), 4.88 (s, 1H), 3.10 (dt,  $J = 13.6, 6.8$  Hz, 2H), 1.16 (s, 6H), 1.14 (s, 6H);  $^{13}C$  NMR (100 MHz,  $CDCl_3$ )  $\delta$  149.85, 141.03, 133.85, 131.89, 128.91, 128.64, 128.08, 124.42, 123.97, 57.30, 27.49, 22.67; HRMS (ESI)  $m/z$  calcd for  $C_{26}H_{27}NO$   $[M-H]^-$  = 368.2014, found = 368.2046.

**2-(4-hydroxy-3,5-diisopropylphenyl)-2-phenyl-2-(p-tolyl)acetonitrile (5e)**

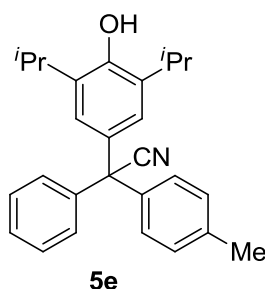

A orange solid;  $^1H$  NMR (400 MHz,  $CDCl_3$ )  $\delta$  7.38-7.28 (m, 3H), 7.22 (dd,  $J = 7.6, 1.8$  Hz, 2H), 7.15 (d,  $J = 8.2$  Hz, 2H), 7.10 (d,  $J = 8.2$  Hz, 2H), 6.86 (s, 2H), 4.91 (s, 1H), 3.11 (dt,  $J = 13.6, 6.8$  Hz, 2H), 2.36 (s, 3H), 1.17 (d,  $J = 1.7$  Hz, 6H), 1.15 (d,  $J = 1.7$  Hz, 6H);  $^{13}C$  NMR (100 MHz,  $CDCl_3$ )  $\delta$  149.81, 141.25, 138.07, 137.85, 133.83, 132.02, 129.30, 128.86, 128.78, 128.58, 127.98, 124.38, 124.05, 57.00, 27.50, 22.68, 21.16; HRMS (ESI)  $m/z$  calcd for  $C_{27}H_{29}NO$   $[M-H]^-$  = 382.2171, found = 382.2169.

**2-(4-chlorophenyl)-2-(4-hydroxy-3,5-diisopropylphenyl)-2-phenylacetonitrile (5f)**

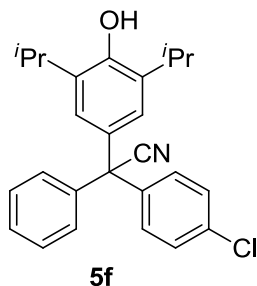

A orange solid;  $^1\text{H}$  NMR (400 MHz,  $\text{CDCl}_3$ )  $\delta$  7.40-7.32 (m, 4H), 7.40-7.33 (m, 4H), 7.32-7.30 (m, 1H), 7.18-7.12 (m, 2H), 6.83 (s, 2H), 4.93 (s, 1H), 3.20-3.00 (m, 2H), 1.17 (d,  $J = 1.2$  Hz, 6H), 1.15 (d,  $J = 1.2$  Hz, 6H);  $^{13}\text{C}$  NMR (100 MHz,  $\text{CDCl}_3$ )  $\delta$  150.04, 140.53, 139.72, 134.19, 134.08, 131.39, 130.31, 128.82, 128.78, 128.31, 124.27, 123.55, 56.84, 27.51, 22.66; HRMS (ESI)  $m/z$  calcd for  $\text{C}_{26}\text{H}_{26}\text{ClNO}[\text{M-H}]^- = 402.1625$ , found = 402.1631.

**2-(3,5-di-tert-butyl-4-hydroxyphenyl)-2,2-diphenylacetonitrile (5g)**

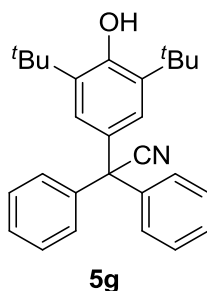

A orange solid;  $^1\text{H}$  NMR (400 MHz,  $\text{CDCl}_3$ )  $\delta$  7.41-7.28 (m, 6H), 7.25-7.18 (m, 4H), 6.96 (s, 2H), 5.28 (s, 1H), 1.34 (s, 18H);  $^{13}\text{C}$  NMR (100 MHz,  $\text{CDCl}_3$ )  $\delta$  153.55, 141.10, 135.91, 130.53, 128.90, 128.61, 128.03, 125.88, 124.02, 57.39, 34.59, 30.26; HRMS (ESI)  $m/z$  calcd for  $\text{C}_{28}\text{H}_{31}\text{NO}[\text{M-H}]^- = 396.2327$ , found = 396.2332.

**6. Attempted enantioselective synthesis of  $\alpha$ -diaryl or  $\alpha$ -triaryl nitriles<sup>[a]</sup>**

All the chiral organophosphine catalysts **P9** and **P10** are known compound and the chiral acrylate **E5-E7** were synthesized using the method as follow and were fully characterized.

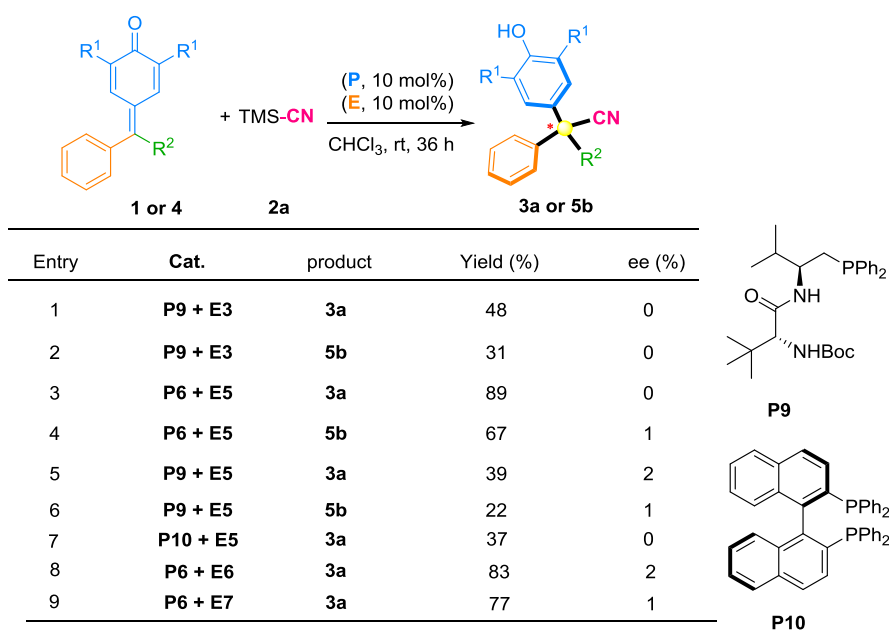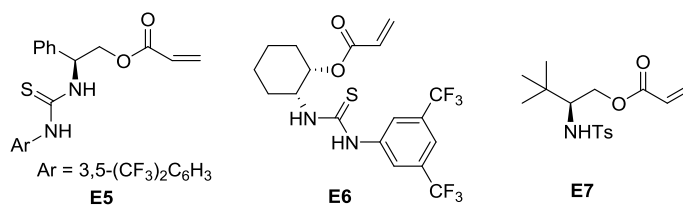

<sup>[a]</sup>Reactions were performed with **1a** or **4b** (0.1 mmol), TMS-CN (0.2 mmol) and **P** (10 mol%) and **E** (10 mol%) in CHCl<sub>3</sub> (1.0 mL) at rt. <sup>b</sup>Isolated yields. <sup>c</sup>Enantiomeric ratio (er) determined by chiral HPLC.

### Scheme S3. Enantioselective synthesis of $\alpha$ -diaryl or $\alpha$ -triaryl nitriles

#### Preparation of chiral acrylates

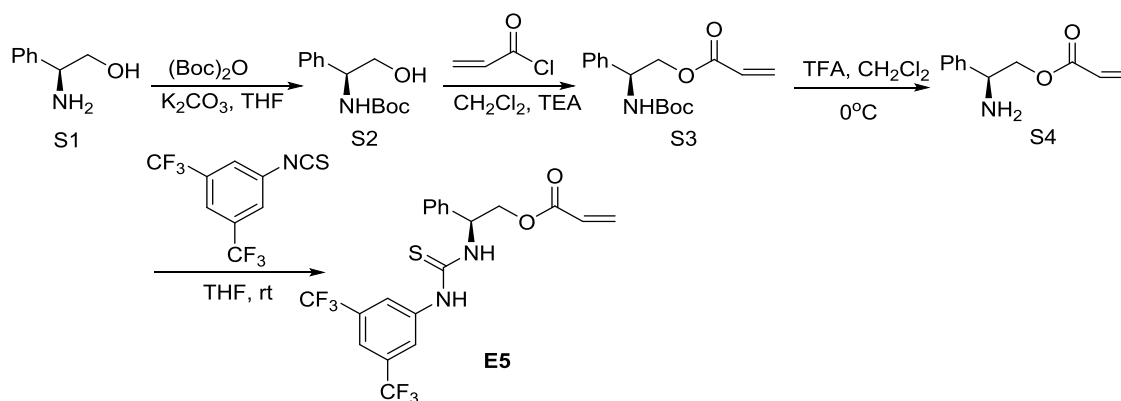

To a (S)-2-amino-2-phenylethanol (5 mmol) and K<sub>2</sub>CO<sub>3</sub> (10 mmol, 2.0 equiv.) in THF, (Boc)<sub>2</sub>O (7.5 mmol, 1.5 equiv.) was added at 0 °C. Then, the reaction mixture was stirred at room temperature for 6 h and TLC show that the reaction was completed. After evaporation of solvent, the crude product S2 was obtained and used directly for next step. To product S2 in CH<sub>2</sub>Cl<sub>2</sub> at 0°C. Then TEA (2.0 equiv.) and acryloyl

chloride (1.5 equiv.) were added slowly at 0°C. The mixture was stirred at rt for 4 h, TLC show that the reaction was completed, then the reaction was quenched by Na<sub>2</sub>CO<sub>3</sub> (aq.) and extracted with CH<sub>2</sub>Cl<sub>2</sub> three times. The combined organic layers were dried over Na<sub>2</sub>SO<sub>4</sub>. After evaporation of solvent, the crude product S3 was obtained and used directly for next step without purified. The crude product S3 was deprotected N-Boc giving the target product S4 by TFA in CH<sub>2</sub>Cl<sub>2</sub> at rt. then to S4 in THF at rt, then 1-isothiocyanato-3,5-bis (trifluoromethyl)benzene (1.2 equiv.) was added, the mixture was stirred at rt for 8 h and TLC show that the reaction was completed. After evaporation of solvent, the final product **E5** was obtained by flash chromatography on silica gel.

**(S)-2-(3-(3,5-bis(trifluoromethyl)phenyl)thioureido)-2-phenylethyl acrylate (E5)**

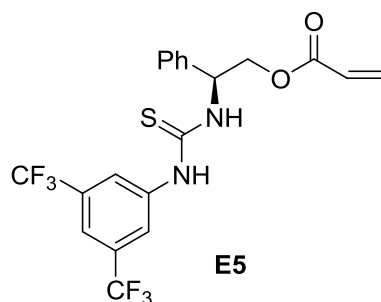

A colorless oil ; <sup>1</sup>H NMR (400 MHz, CDCl<sub>3</sub>) δ 8.55 (s, 1H), 7.74 (s, 2H), 7.64 (s, 1H), 7.35-7.27 (m, 3H), 7.22 (dd, *J* = 9.4, 3.6 Hz, 2H), 6.31 (dd, *J* = 17.2, 0.6 Hz, 1H), 6.01 (dd, *J* = 17.2, 10.4 Hz, 1H), 5.81 (dd, *J* = 10.5, 1.0 Hz, 1H), 5.73 (s, 1H), 4.55 (dd, *J* = 11.8, 7.2 Hz, 1H), 4.35 (dd, *J* = 11.8, 4.2Hz, 1H); <sup>13</sup>C NMR (100 MHz, CDCl<sub>3</sub>) δ 180.75, 167.06, 139.06, 136.98, 132.69 (q, *J*= 27.3 Hz), 129.22, 128.66, 127.42, 127.00, 126.89, 124.24 (d, *J* = 2.8 Hz), 121.58, 119.54, 66.38, 58.41; HRMS (ESI) *m/z* calcd for C<sub>20</sub>H<sub>17</sub>F<sub>6</sub>N<sub>2</sub>O<sub>2</sub>S[M+H]<sup>+</sup>=463.0909, found = 463.0910.

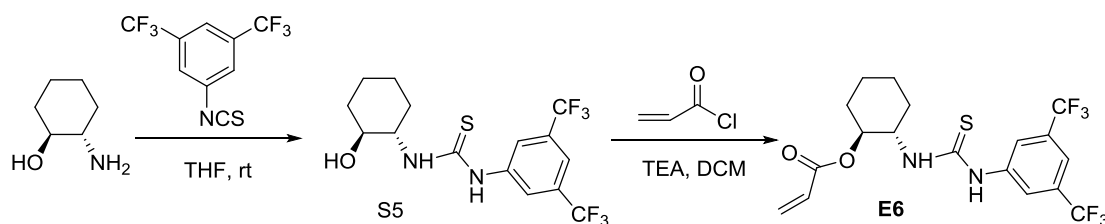

To a (1S, 2S)-2-aminocyclohexanol (10 mmol) and 1-isothiocyanato-3,5-bis

(trifluoromethyl)benzene (12 mmol, 1.2 equiv. ) in THF, the reaction mixture was stirred at room temperature for 6 h and TLC show that the reaction was completed. After evaporation of solvent, the crude product S5 was obtained and was used directly for next step. To the product S5 in CH<sub>2</sub>Cl<sub>2</sub> at 0°C, TEA (20 mmol, 2.0 equiv.) and acryloyl chloride (15 mmol, 1.5 equiv.) were added slowly at 0°C. Then the mixture was stirred at rt for 3 h, TLC show that the reaction was completed, then quenched by Na<sub>2</sub>CO<sub>3</sub>(aq.) and extracted with CH<sub>2</sub>Cl<sub>2</sub> three times. The combined organic layer was dried over Na<sub>2</sub>SO<sub>4</sub>. After evaporation of solvent, the crude product was purified by flash chromatography on silica gel to afford the final product **E6**.

**(1S,2R)-2-(3-(3,5-bis(trifluoromethyl)phenyl)thioureido)cyclohexyl acrylate (E6)**

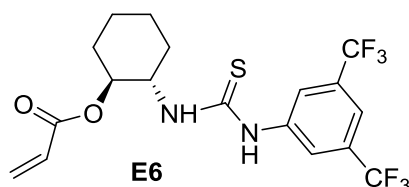

A colorless oil ; <sup>1</sup>H NMR (400 MHz, CDCl<sub>3</sub>) δ 7.81 (s, 1H), 7.49 (s, 2H), 6.36 (dd, *J* = 17.2, 1.6 Hz, 1H), 6.05 (dd, *J* = 17.2, 10.4 Hz, 1H), 5.80 (dd, *J* = 10.4, 1.6 Hz, 1H), 4.64- 4.50 (m, 1H), 3.43 (td, *J* = 8.8, 4.4 Hz, 1H), 3.23-3.16 (m, 2H), 3.15- 3.08 (m, 2H), 1.89-1.79 (m, 1H), 1.55 (s, 1H), 1.39-1.19 (m, 4H); <sup>13</sup>C NMR (100 MHz, CDCl<sub>3</sub>) δ 169.62, 165.06, 148.48, 140.11, 132.13 (q, *J* = 33.8 Hz), 130.54, 129.98 (d, *J* = 3.0 Hz), 128.90, 124.49, 121.78, 119.07, 75.37, 62.46, 35.89, 29.81 (d, *J* = 80.2 Hz), 23.25 (d, *J* = 17.2 Hz), 22.34. HRMS (ESI) *m/z* calcd for C<sub>18</sub>H<sub>18</sub>F<sub>6</sub>N<sub>2</sub>O<sub>2</sub>S [M+ H]<sup>+</sup> = 441.1071, found = 441.1073.

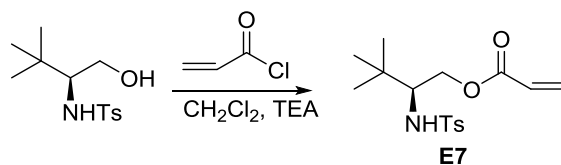

To a (S)-N-(1-hydroxy-3,3-dimethylbutan-2-yl)-4-methylbenzenesulfonamide (10 mmol) in CH<sub>2</sub>Cl<sub>2</sub> at 0°C. then, TEA (20 mmol, 2.0 equiv.) was added and acryloyl chloride (15 mmol, 1.5 equiv.) was added slowly at 0°C. Then the mixture was stirred at rt for 5 h, TLC show that the reaction was completed, then the reaction was quenched by Na<sub>2</sub>CO<sub>3</sub>(aq.) and extracted with CH<sub>2</sub>Cl<sub>2</sub> three times. The combined

organic layers were dried over Na<sub>2</sub>SO<sub>4</sub>. After evaporation of solvent, the crude product was purified by flash chromatography on silica gel to afford the final product **E7**.

**(S)-3,3-dimethyl-2-(4-methylphenylsulfonamido)butyl acrylate (E7)**

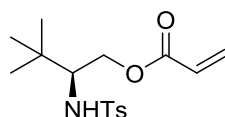

**E7**

A colorless oil ; <sup>1</sup>H NMR (400 MHz, CDCl<sub>3</sub>) δ 7.73 (d, *J* = 8.3 Hz, 2H), 7.28-7.23 (m, 2H), 6.31 (dd, *J* = 16.8, 1.9 Hz, 1H), 5.79 (ddd, *J* = 13.6, 12.3, 6.2 Hz, 2H), 4.84 (d, *J* = 9.8 Hz, 1H), 4.06 (ddd, *J* = 15.9, 11.9, 5.0 Hz, 2H), 3.34 (ddd, *J* = 10.0, 6.1, 4.0 Hz, 1H), 2.40 (s, 3H), 0.92 (s, 9H); <sup>13</sup>C NMR (100 MHz, CDCl<sub>3</sub>) δ 166.07, 143.31, 138.79, 131.31, 129.76, 127.88, 127.07, 63.87, 61.09, 34.54, 27.07, 21.62; HRMS (ESI) *m/z* calcd for C<sub>16</sub>H<sub>22</sub>NO<sub>4</sub>S[M+H]<sup>+</sup> = 326.1426, found = 326.1424.

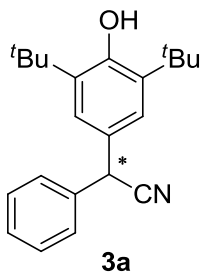

**3a**

HPLC: (Chiralcel ODH, λ = 254 nm, 1% *i*-PrOH/hexane, flow rate = 0.5 mL/min) , *t*<sub>1</sub> = 12.9 min, *t*<sub>2</sub> = 14.4 min, 2% ee.



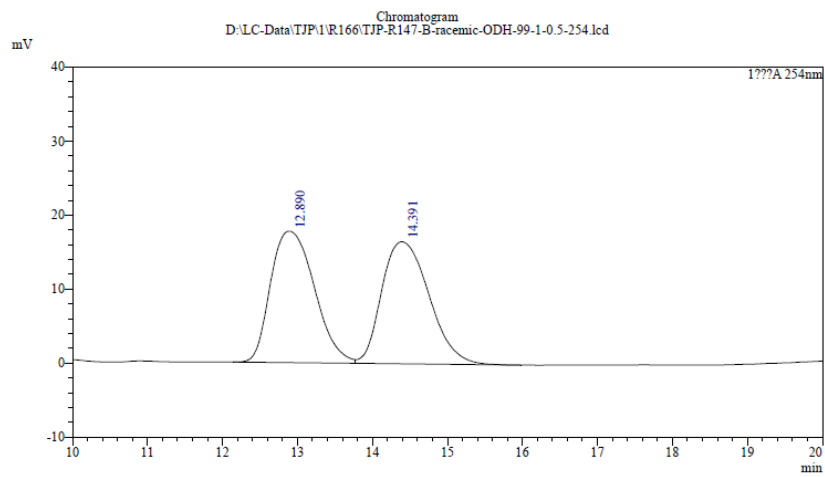

Peak Table

| Peak# | Ret. Time | Height | Area    | Height% | Area%   |
|-------|-----------|--------|---------|---------|---------|
| 1     | 12.890    | 17776  | 722253  | 51.891  | 49.906  |
| 2     | 14.391    | 16481  | 724980  | 48.109  | 50.094  |
| Total |           | 34257  | 1447233 | 100.000 | 100.000 |

### Racemic **3a**

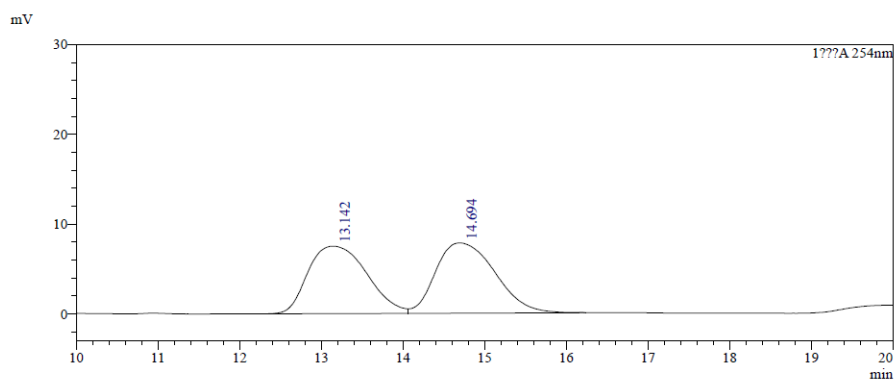

Peak Table

| Peak# | Ret. Time | Height | Area   | Height% | Area%   |
|-------|-----------|--------|--------|---------|---------|
| 1     | 13.142    | 7505   | 376209 | 48.962  | 48.795  |
| 2     | 14.694    | 7823   | 394797 | 51.038  | 51.205  |
| Total |           | 15328  | 771006 | 100.000 | 100.000 |

### Enantiomerically enriched **3a**

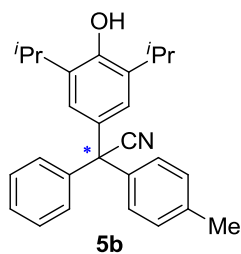

HPLC: (Chiralcel ADH,  $\lambda = 254$  nm, 5% *i*-PrOH/hexane, flow rate = 0.5 mL/min),  $t_1 = 41.9$  min,  $t_2 = 44.8$  min, 1% ee .

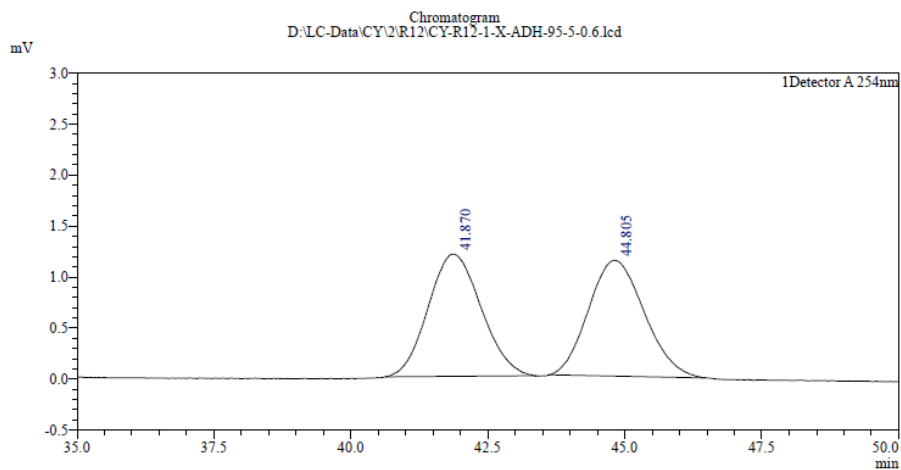

Peak Table

| Peak# | Ret. Time | Area   | Height | Height% | Area%   |
|-------|-----------|--------|--------|---------|---------|
| 1     | 41.870    | 80735  | 1198   | 51.335  | 50.067  |
| 2     | 44.805    | 80518  | 1136   | 48.665  | 49.933  |
| Total |           | 161252 | 2334   | 100.000 | 100.000 |

### Racemic **5b**

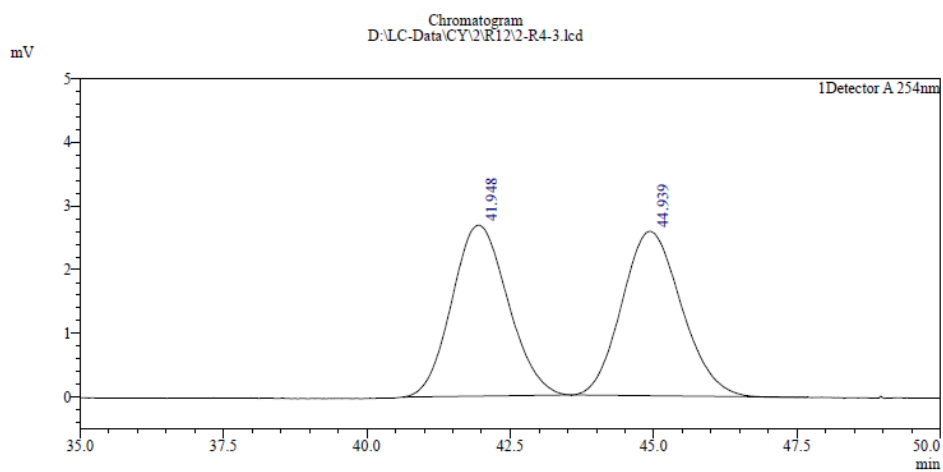

Peak Table

| Peak# | Ret. Time | Area   | Height | Height% | Area%   |
|-------|-----------|--------|--------|---------|---------|
| 1     | 41.948    | 182621 | 2684   | 50.964  | 49.428  |
| 2     | 44.939    | 186845 | 2583   | 49.036  | 50.572  |
| Total |           | 369466 | 5267   | 100.000 | 100.000 |

### Enantiomerically enriched **5b**

## 7. Gram-scale synthesis and elaboration of reaction product

### (a) Gram-scale synthesis

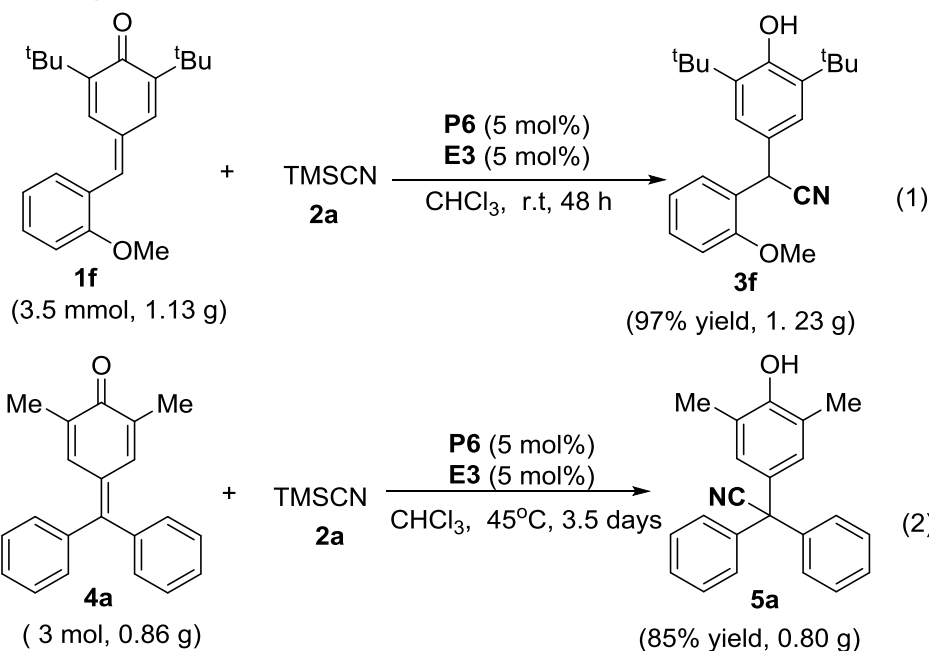

To a dried round bottle flask with a magnetic stirring bar were added  $\text{P}_6$  (5 mol%),  $\text{E}_3$  (5 mol%) in  $\text{CHCl}_3$  (10.0 mL) and then *para*-Quinone Methide **1f** (3.5 mmol, 1.13 g) and **TMSCN** (7.0 mmol, 0.7 g) were added. The reaction mixture was stirred at rt for 48 h, and TLC show that the reaction was completed. Then, 1M TFA (5 mL) was added to the mixture and stirred for 5mins, The resulting solution was quenched by  $\text{Na}_2\text{CO}_3$  (aq.) and was extracted with  $\text{CH}_2\text{Cl}_2$  (3×100 mL). Then the combined organic phases were washed with brine and dried over anhydrous  $\text{Na}_2\text{SO}_4$ . The solvent was removed to give the crude product which was purified by flash column chromatography (PE/ethyl acetate = 80/1 to 10/1) to afford the desired compounds **3f** (1.19 g, 97% yield).

(b) Synthetic elaboration of product

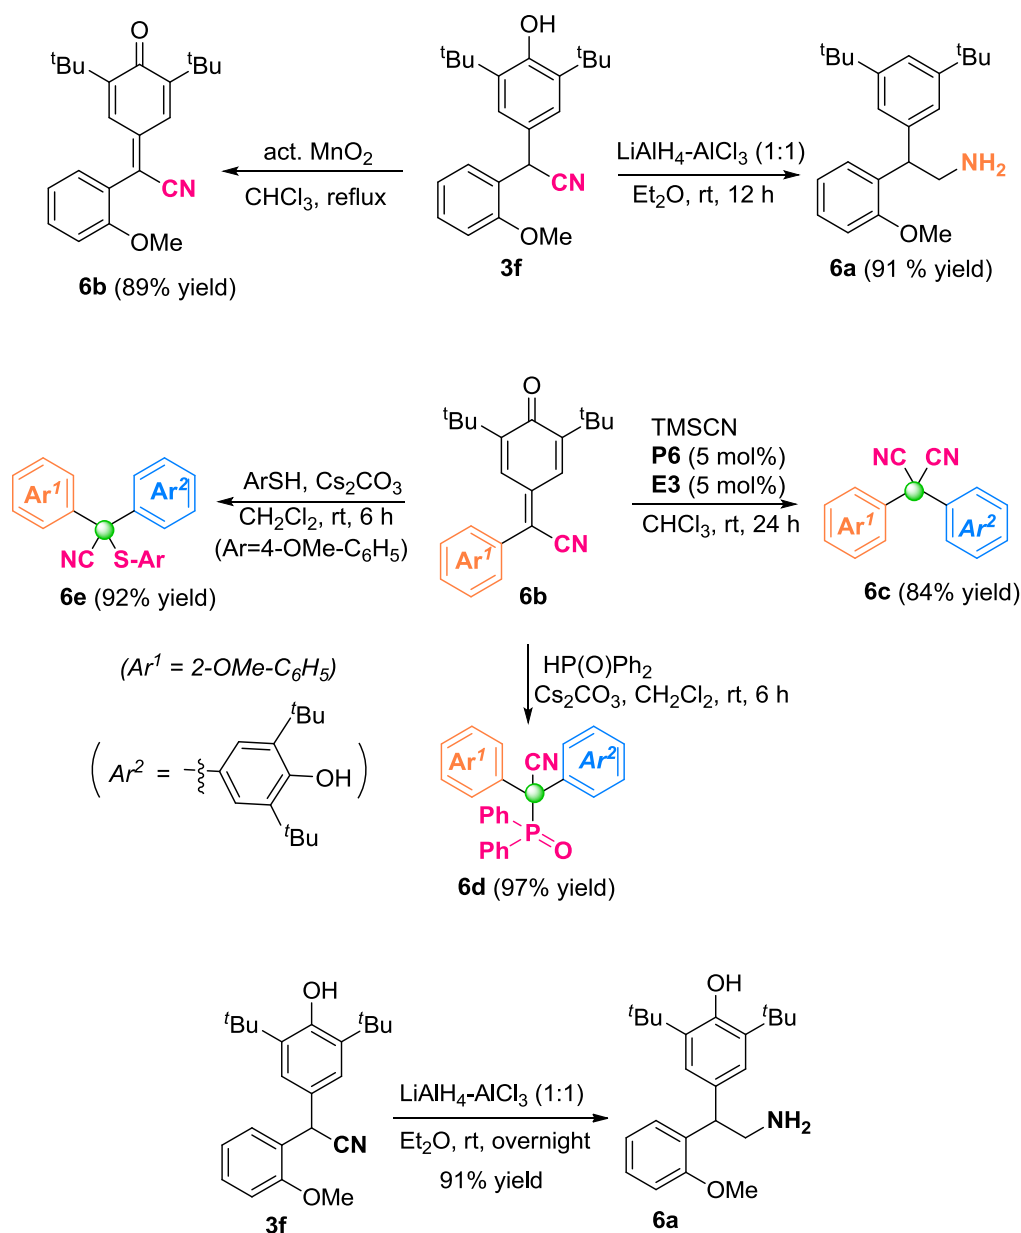

To a dried round bottle flask with a magnetic stirring bar were added LiAlH<sub>4</sub> (0.6 mmol, 23 mg). AlCl<sub>3</sub> (0.6 mmol, 80 mg) were added together, then *para*-Quinone Methides **3f** (0.4 mmol, 128 mg) and Et<sub>2</sub>O (5 mL) were added. The reaction mixture was stirred at rt overnight, and TLC show that the reaction was completed. Then, the reaction was quenched by water. The resulting solution was extracted with CH<sub>2</sub>Cl<sub>2</sub> (3×100 mL). Then the combined organic phases were washed with brine and dried over anhydrous Na<sub>2</sub>SO<sub>4</sub>. The solvent was removed to give the crude product which

was purified by flash column chromatography to afford the desired compounds **6a** (194 mg, yield 91%).

**4-(2-amino-1-(2-methoxyphenyl)ethyl)-2,6-di-tert-butylphenol (6a)**

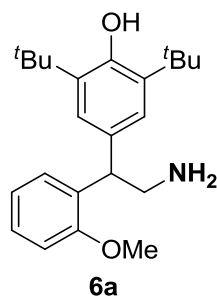

A white solid;  $^1\text{H}$  NMR (400 MHz,  $\text{CDCl}_3$ )  $\delta$  7.19 -7.10 (m, 2H), 7.07 (s, 2H), 6.85 (dd,  $J = 12.2, 7.8$  Hz, 2H), 4.92 (s, 3H), 4.45 (t,  $J = 8.1$  Hz, 1H), 3.81 (s, 3H), 3.52-3.38 (m, 1H), 3.37-3.32 (m, 1H), 1.40 (s, 18H);  $^{13}\text{C}$  NMR (100 MHz,  $\text{CDCl}_3$ )  $\delta$  157.40, 152.62, 135.93, 131.53, 129.77, 128.71, 127.97, 124.92, 120.82, 111.11, 55.49, 45.96, 44.78, 34.48, 30.42; HRMS (ESI)  $m/z$  calcd for  $\text{C}_{23}\text{H}_{33}\text{NO}_2$   $[\text{M}+\text{H}]^+ = 356.2590$ , found = 356.2548.

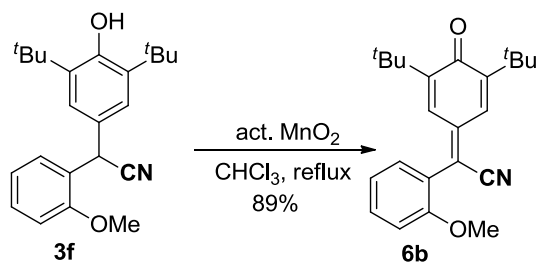

To a dried round bottle flask with a magnetic stirring bar were added act. $\text{MnO}_2$  (3 mmol, 261 mg) and *para*-Quinone Methide **3f** (1 mmol, 372 mg), then 5 mL  $\text{CHCl}_3$  was added. The reaction mixture was stirred reflux overnight, and TLC show that the reaction was completed. Then, the reaction was filtrated by celite. the solvent was removed under reduced press to give the crude product which was purified by flash column chromatography to afford the desired compounds **6b** (310 mg, yield 89%).

**2-(3,5-di-tert-butyl-4-oxocyclohexa-2,5-dien-1-ylidene)-2-(2-methoxyphenyl)acetonitrile (6b)**

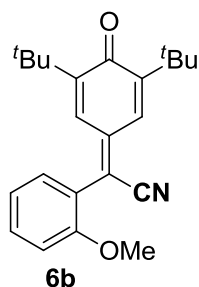

A orange solid;  $^1\text{H}$  NMR (400 MHz,  $\text{CDCl}_3$ )  $\delta$  7.59 (d,  $J = 2.6$  Hz, 1H), 7.47 (td,  $J = 8.4, 1.7$  Hz, 1H), 7.20 (dd,  $J = 7.6, 1.7$  Hz, 1H), 7.09-7.00 (m, 2H), 6.98 (d,  $J = 2.6$  Hz, 1H), 3.91 (s, 3H), 1.35 (s, 9H), 1.18 (s, 9H);  $^{13}\text{C}$  NMR (100 MHz,  $\text{CDCl}_3$ )  $\delta$  186.57, 157.58, 151.51, 150.82, 141.84, 132.30, 132.19, 129.53, 127.84, 121.18, 120.82, 117.42, 117.09, 111.83, 5.93, 35.83, 35.77, 29.63, 29.55; HRMS (ESI)  $m/z$  calcd for  $\text{C}_{23}\text{H}_{27}\text{NO}_2$   $[\text{M}+\text{H}]^+ = 350.2120$ , found = 350.2122.

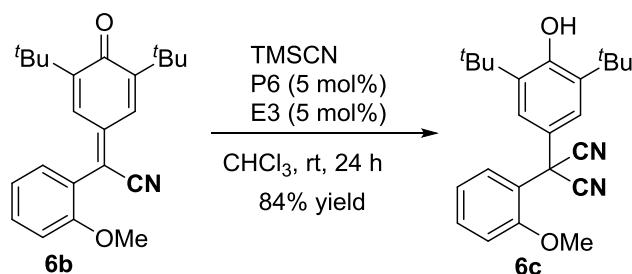

To a dried round bottle flask with a magnetic stirring bar were added  $\text{P}_6$  (5 mol%),  $\text{E}_3$  (5 mol%) in  $\text{CHCl}_3$  (1.0 mL) and then **6b** (35 mg, 0.1 mmol) and TMS-CN (20 mg, 0.2 mmol) were added. The reaction mixture was stirred at rt for 24 h, and TLC show that the reaction was completed. Then, 1 M TFA (2 mL) was added to the mixture, and stirred for 5 mins, the resulting solution was extracted with  $\text{CH}_2\text{Cl}_2$  ( $3 \times 10$  mL). Then the combined organic phases were washed with brine and dried over anhydrous  $\text{Na}_2\text{SO}_4$ . The solvent was removed to give the crude product which was purified by flash column chromatography (PE/ethyl acetate = 60/1 to 10/1) to afford the desired compounds **6c**.

### 2-(3,5-di-tert-butyl-4-hydroxyphenyl)-2-(2-methoxyphenyl)malononitrile (6c)

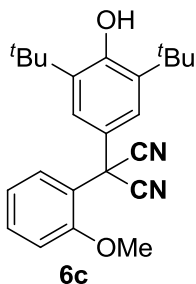

A orange solid;  $^1\text{H}$  NMR (400 MHz,  $\text{CDCl}_3$ )  $\delta$  7.47-7.39 (m, 1H), 7.33 (s, 2H), 7.06 (dd,  $J = 7.8, 1.6$  Hz, 1H), 7.02-6.95 (m, 2H), 5.44 (s, 1H), 3.92 (s, 3H), 1.43 (s, 18H);  $^{13}\text{C}$  NMR (100 MHz,  $\text{CDCl}_3$ )  $\delta$  156.81, 154.84, 136.96, 131.79, 128.17, 124.23, 122.30, 122.21, 121.14, 115.19, 112.48, 56.08, 43.23, 34.74, 30.21; HRMS (ESI)  $m/z$  calcd for  $\text{C}_{24}\text{H}_{28}\text{N}_2\text{O}_2$   $[\text{M}-\text{H}]^- = 375.2073$ , found = 375.2070.

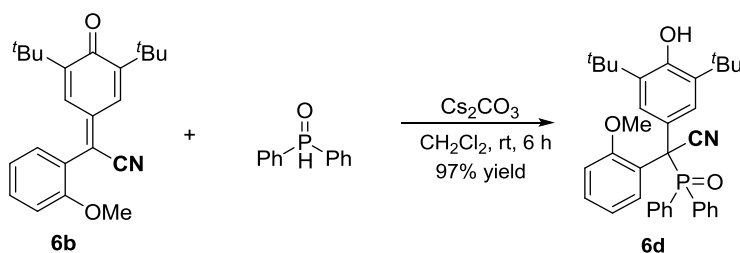

To a dried round bottle flask with a magnetic stirring bar were added **6b** (35 mg, 0.1 mmol) and diphenylphosphine oxide (0.12 mmol) and  $\text{Cs}_2\text{CO}_3$  (0.2 mmol) in  $\text{CH}_2\text{Cl}_2$ . The reaction mixture was stirred at rt for 6 h, and TLC show that the reaction was completed. The crude mixture was purified by flash column chromatography (PE/ethyl acetate = 20/1 to 3/1) to afford the desired compounds **6d**.

### 2-(3,5-di-tert-butyl-4-hydroxyphenyl)-2-(diphenylphosphoryl)-2-(2-methoxyphenyl)acetonitrile (6d)

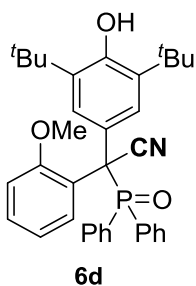

A white foam;  $^1\text{H}$  NMR (400 MHz,  $\text{CDCl}_3$ )  $\delta$  8.26 (dt,  $J = 8.1, 1.4$  Hz, 1H), 8.17 – 8.10 (m, 2H), 7.57 – 7.52 (m, 1H), 7.50 – 7.40 (m, 3H), 7.36 – 7.26 (m, 4H), 7.25 – 7.23 (m, 1H), 6.95 (d,  $J = 2.0$  Hz, 2H), 6.90 – 6.85 (m, 2H), 5.17 (s, 1H), 3.56 (s, 3H), 1.27 (s, 18H);  $^{13}\text{C}$  NMR (100 MHz,  $\text{CDCl}_3$ )  $\delta$  157.58 (d,  $J = 7.4$  Hz), 153.46 (d,  $J = 2.7$  Hz), 134.84 (d,  $J = 2.2$  Hz), 133.72, 133.63, 132.87, 132.79, 132.28 (d,  $J = 2.8$  Hz), 132.12 (d,  $J = 2.8$  Hz), 131.02 (d,  $J = 3.1$  Hz), 130.90, 130.02, 129.29, 128.72 (d,  $J = 11.8$  Hz), 127.52 (d,  $J = 12.4$  Hz), 126.37 (d,  $J = 1.8$  Hz), 124.75, 122.82 (d,  $J = 5.9$  Hz), 120.52, 119.77, 113.33, 56.03, 49.74 (d,  $J = 58.8$  Hz), 34.45, 30.27;  $^{31}\text{P}$  NMR (162 MHz,  $\text{CDCl}_3$ )  $\delta$  32.76; HRMS (ESI)  $m/z$  calcd for  $\text{C}_{35}\text{H}_{38}\text{NO}_3\text{P}$   $[\text{M}-\text{H}]^- = 550.2517$ , found = 550.2493.

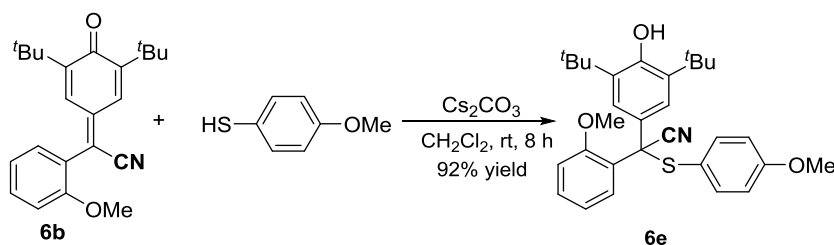

To a dried round bottle flask with a magnetic stirring bar were added **6b** (35 mg, 0.1 mmol) and 4-methoxybenzenethiol (0.12 mmol) and  $\text{Cs}_2\text{CO}_3$  (0.2 mmol) in  $\text{CH}_2\text{Cl}_2$ . The reaction mixture was stirred at rt for 8 h, and TLC show that the reaction was completed. The crude mixture was purified by flash column chromatography (PE/ethyl acetate = 20/1 to 3/1) to afford the desired compounds **6e**.

**2-(3,5-di-tert-butyl-4-hydroxyphenyl)-2-(2-methoxyphenyl)-2-((4-methoxyphenyl)thio)acetonitrile (6e)**



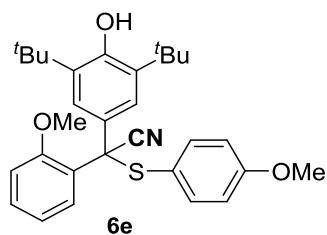

A pale yellow solid;  $^1\text{H}$  NMR (400 MHz,  $\text{CDCl}_3$ )  $\delta$  7.87 (dd,  $J = 7.8, 1.6$  Hz, 1H), 7.37 (td,  $J = 8.2, 1.6$  Hz, 1H), 7.16 (d,  $J = 8.2$  Hz, 2H), 7.07-6.99 (m, 3H), 6.97 (s, 2H), 6.91 (dd,  $J = 8.2, 0.8$  Hz, 1H), 5.15 (s, 1H), 3.64 (s, 3H), 2.30 (s, 3H), 1.30 (s, 18H);  $^{13}\text{C}$  NMR (100 MHz,  $\text{CDCl}_3$ )  $\delta$  157.30, 153.29, 140.11, 137.01, 135.25, 131.69, 130.37, 129.54, 128.60, 128.50, 127.08, 126.07, 124.15, 120.59, 113.15, 56.10, 55.39, 34.46, 30.25, 21.42. HRMS (ESI)  $m/z$  calcd for  $\text{C}_{30}\text{H}_{35}\text{NO}_3\text{S}$   $[\text{M}-\text{H}]^- = 488.2259$ , found = 488.2261.

## 8. Experimental studies on mechanism and proposed reaction pathway

### a) Experimental studies on mechanism

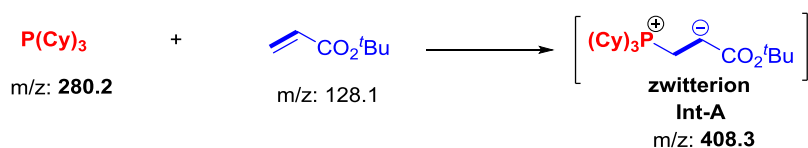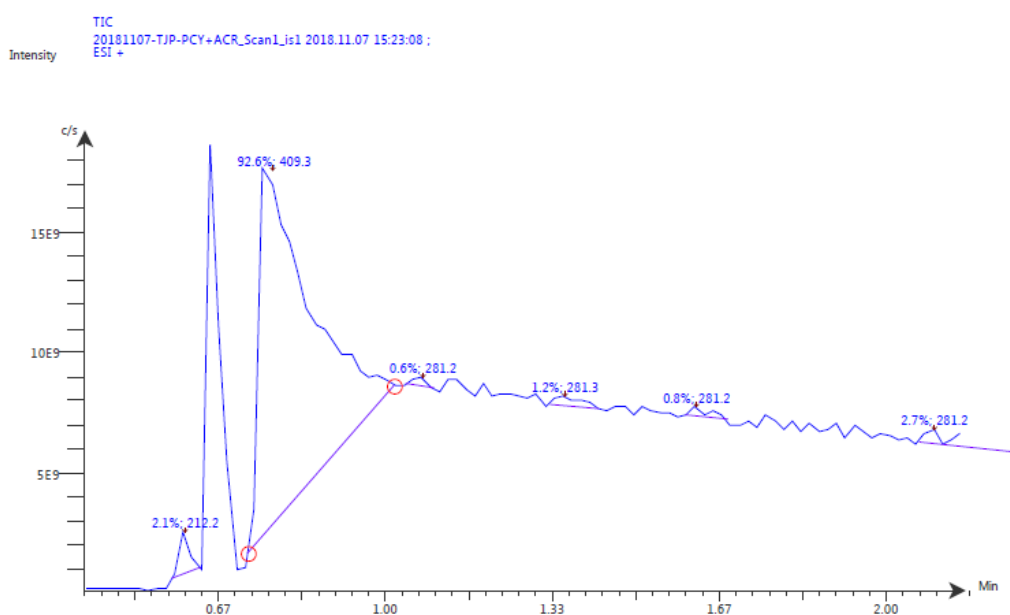



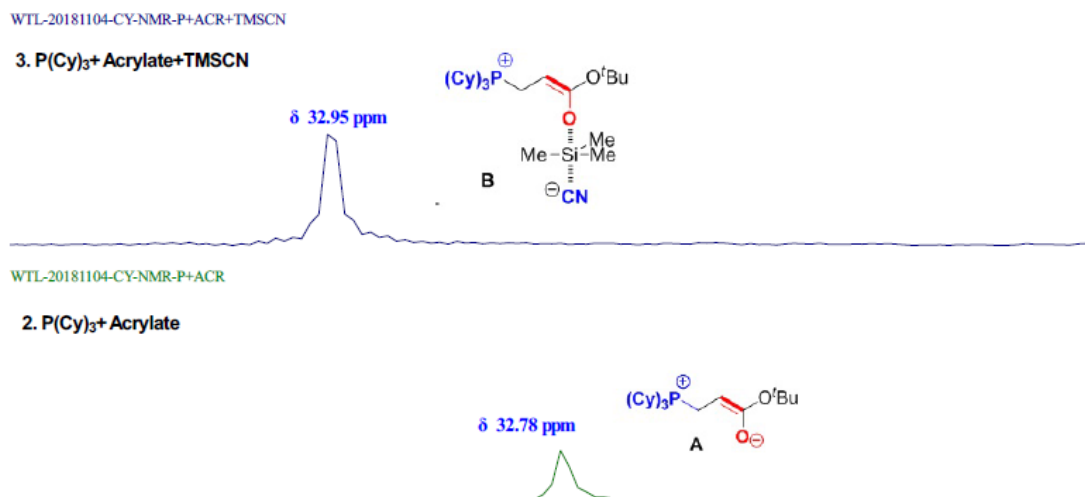

**Figure S3.** <sup>31</sup>P NMR experimental studies on mechanism

To gain further insight of the reaction mechanism, we then employed ESI-MS techniques and <sup>31</sup>P NMR for characterization of this catalytic system. P(Cy)<sub>3</sub> and *tert*-butyl acrylate was added together and The resulting mixture was shaken up and immediately applied to ESI-MS analysis, then generate a zwitterion in situ int-A which was confirmed by ESI-MS with a new single peak **int-A.H** (m/z 409.3) (Figure S2).

Furthermore, the <sup>31</sup>P NMR study to track the reaction intermediate was carried out (Figure S3). when P(Cy)<sub>3</sub> and *tert*-butyl acrylate were added into in an NMR tube and shaken 5 mins, the formation of the zwitterion intermediate A as a new <sup>31</sup>P NMR chemical shift was generated at  $\delta = 32.78$  ppm .Then TMSCN was added into the NMR tube and another new <sup>31</sup>P NMR chemical shift was generated at  $\delta = 32.95$  ppm, suggesting that efficient activation of TMSCN by the zwitterion intermediate A to form a new specie. We proposed that the zwitterion intermediate A may conduct as a Lewis base to active the Si of TMSCN to form a new intermediate ion-pair B (Figure S4).

#### b). Proposed reaction pathway

According to the studies on the above mechanism experimental results and several control experiments, we proposed a plausible reaction pathway for the dual-reagent

catalysis promoted direct 1,6-cyanation reaction (Figure S4). First, the Michael-type addition of  $P(Cy)_3$  to *tert*-butyl acrylate generate a zwitterion **A**, which serves as a Lewis base to activate TMS-CN to form a new species **B**. Then this zwitterion **B** release the active CN anion, which attack to C=C bond of *p*-QMs or fuchsone to accomplish 1,6 addition/aromatization affording the intermediate **C**, which was quenched by acid quickly to give the target product.

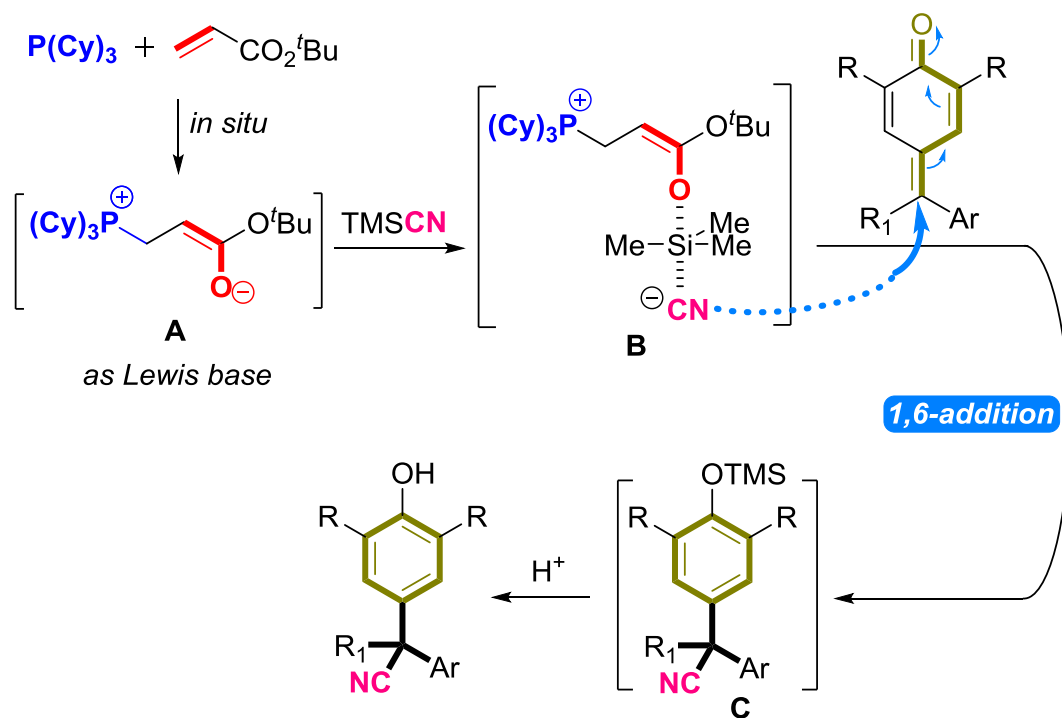

**Figure S4.** Proposed reaction pathway

## 9. References

- [1] W.-D. Chu, L.-F. Zhang, X. Bao, X.-H. Zhao, C. Zeng, J.-Y. Du, G.-B. Zhang, F.-X. Wang, X.-Y. Ma, C.-A. Fan, *Angew. Chem. Int. Ed.*, **2013**, 52, 9229.
- [2] H. D. Becker, *J. Org. Chem.*, **1967**, 32, 2943.

## 10. NMR Spectra

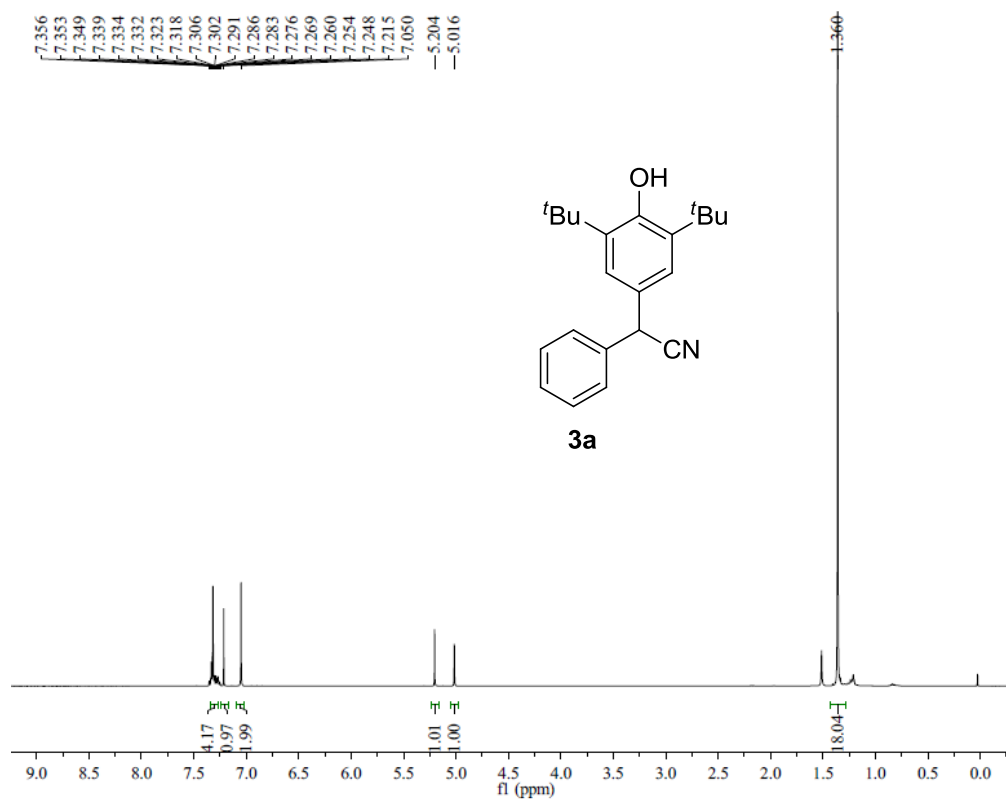

<sup>1</sup>H NMR of **3a**

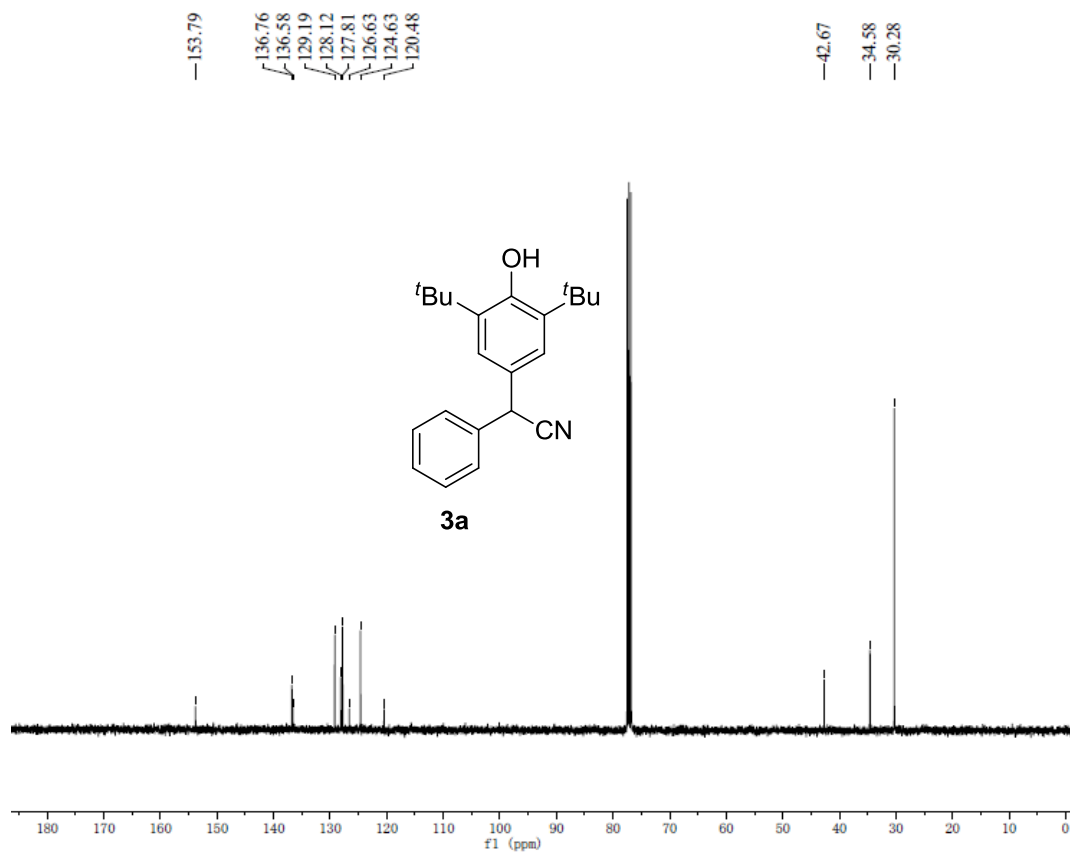

<sup>13</sup>C NMR of **3a**

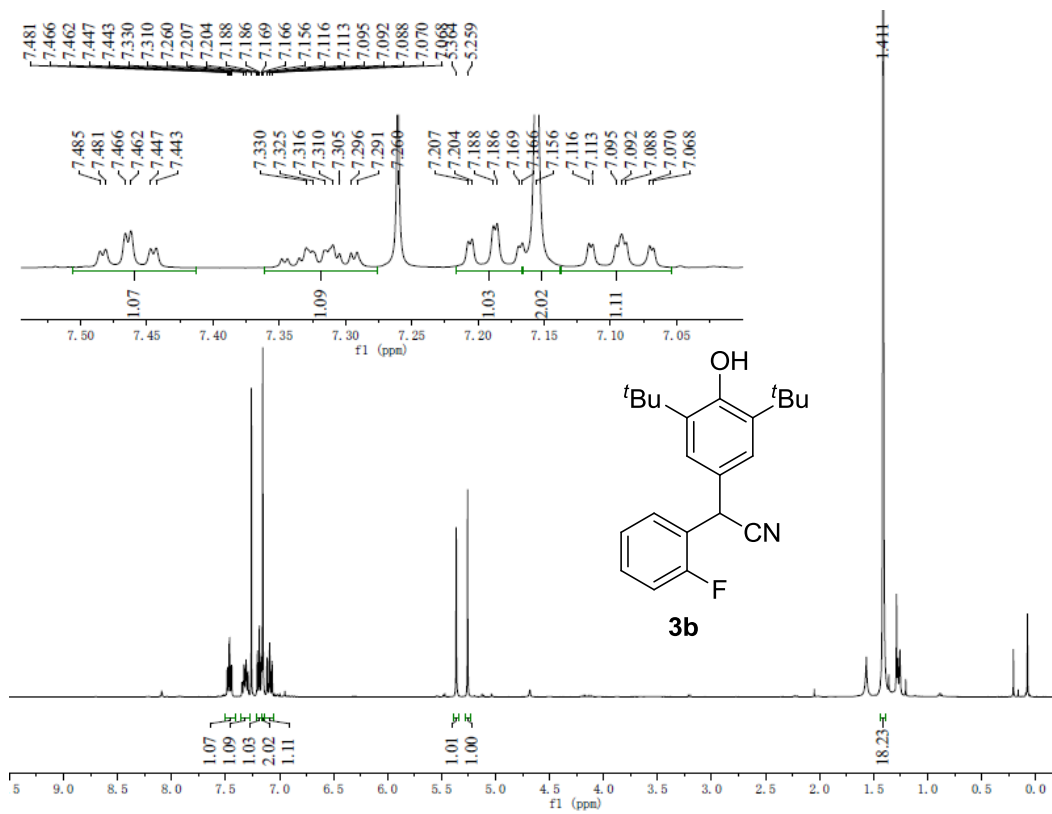

<sup>1</sup>H NMR of **3b**

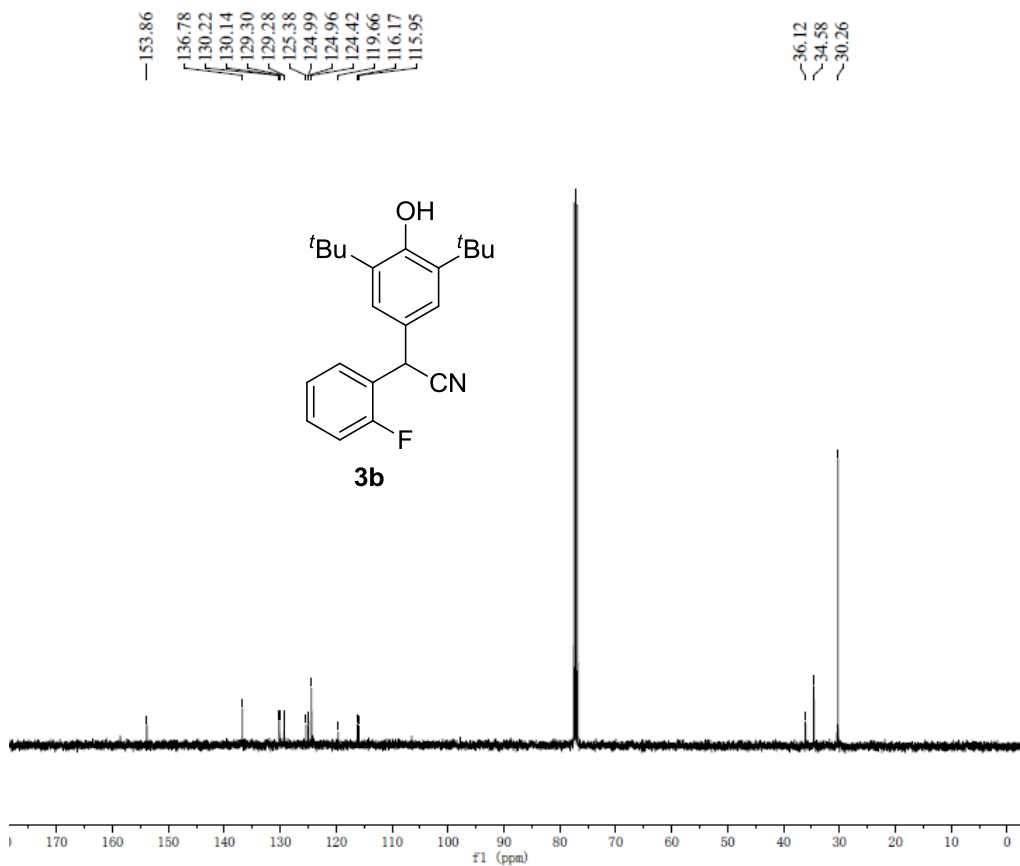

<sup>13</sup>C NMR of **3b**

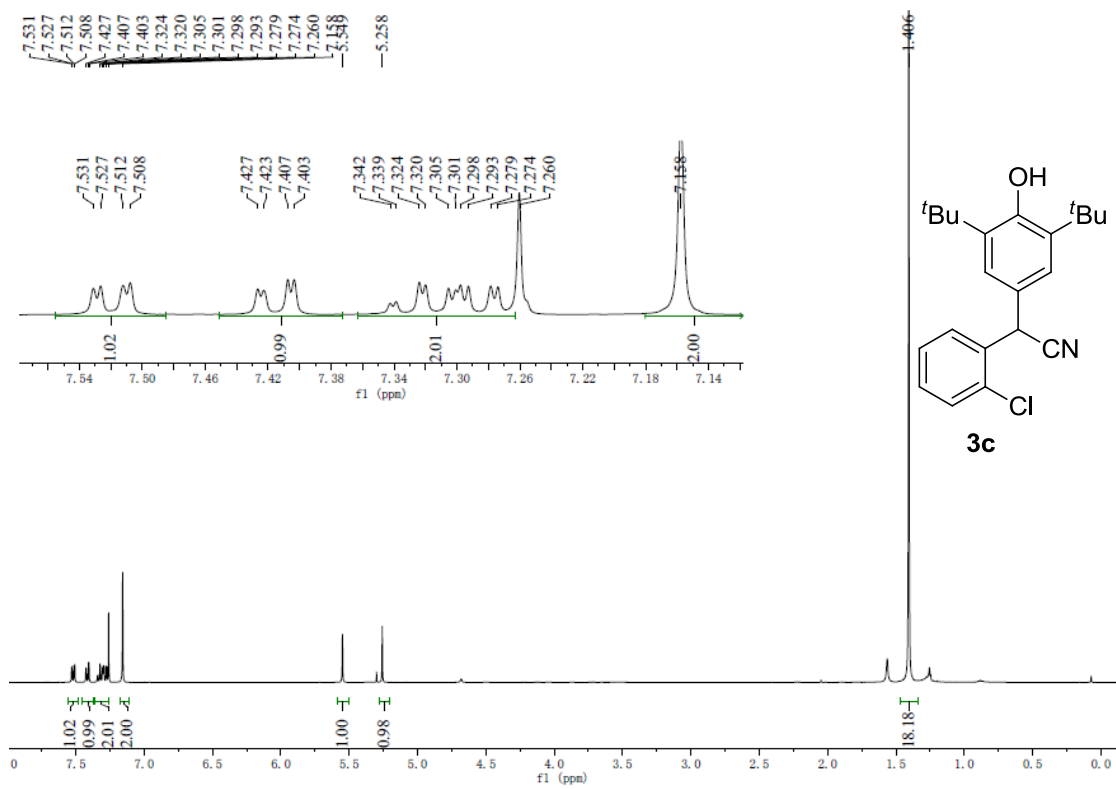

<sup>1</sup>H NMR of 3c

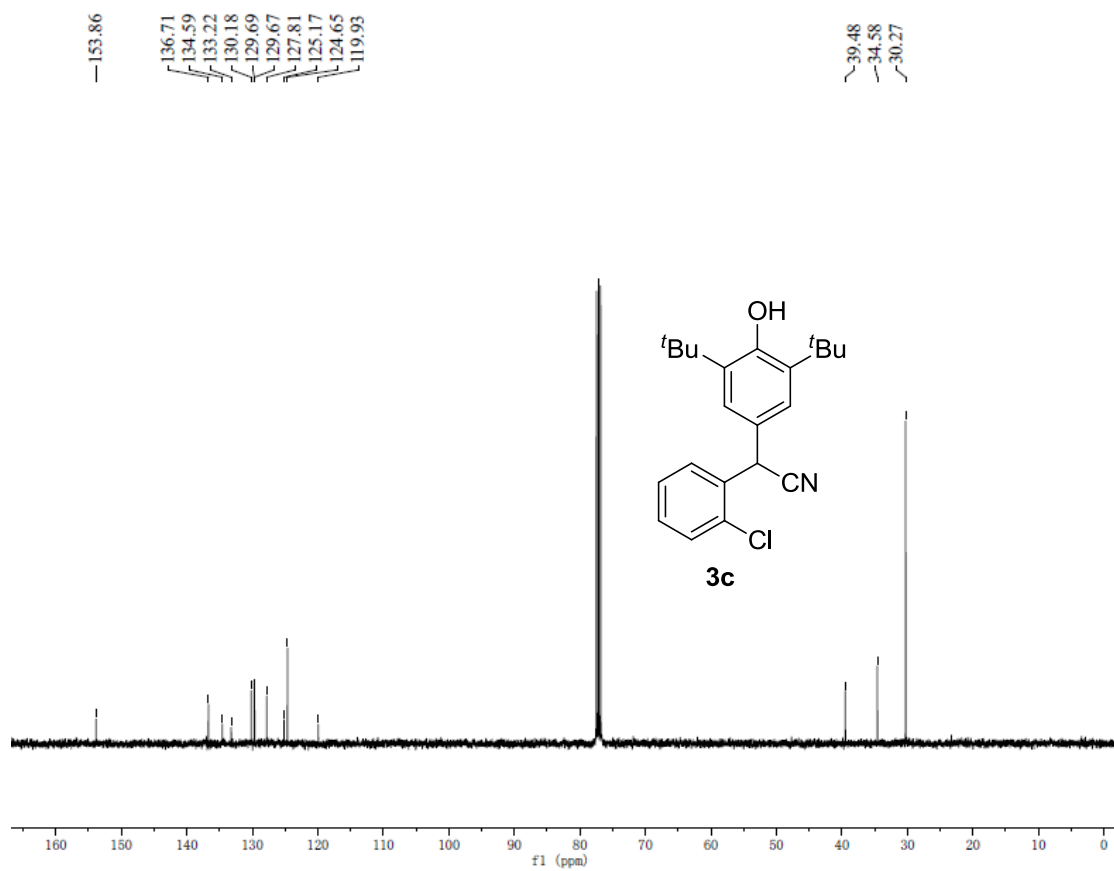

<sup>13</sup>C NMR of 3c

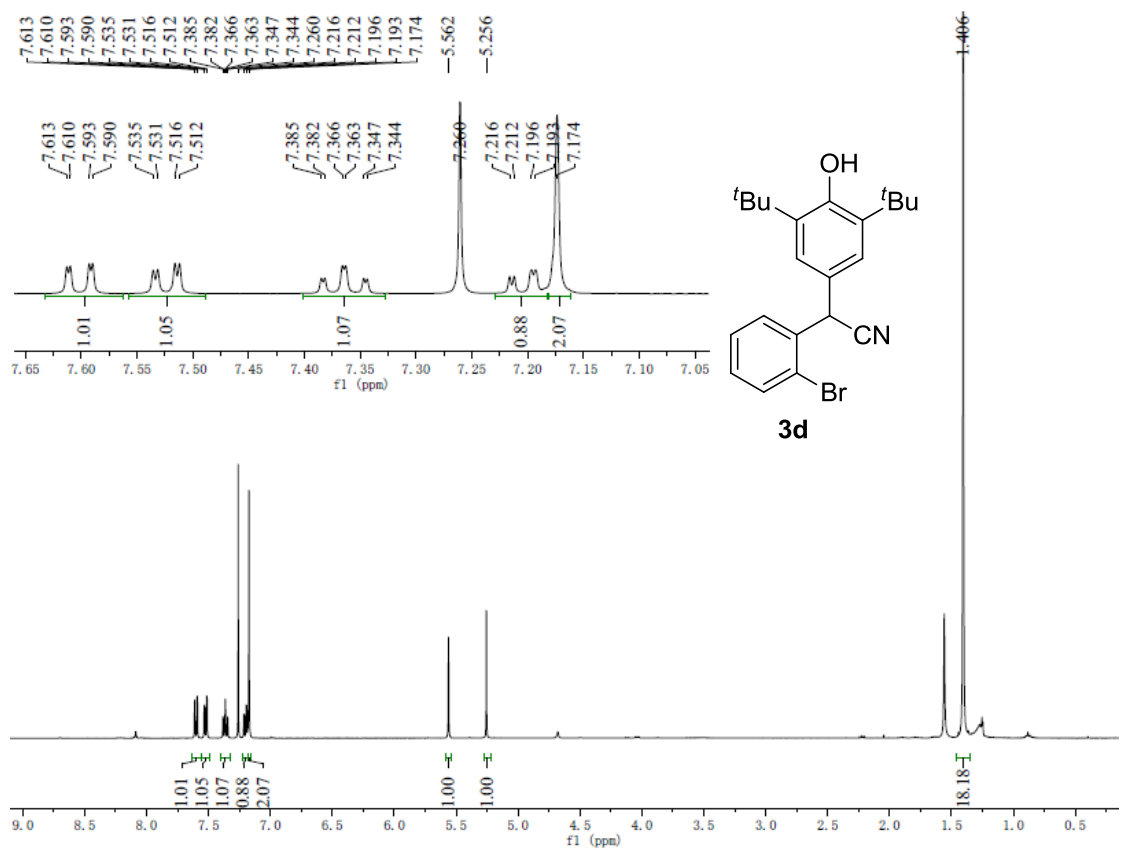

<sup>1</sup>H NMR of 3d

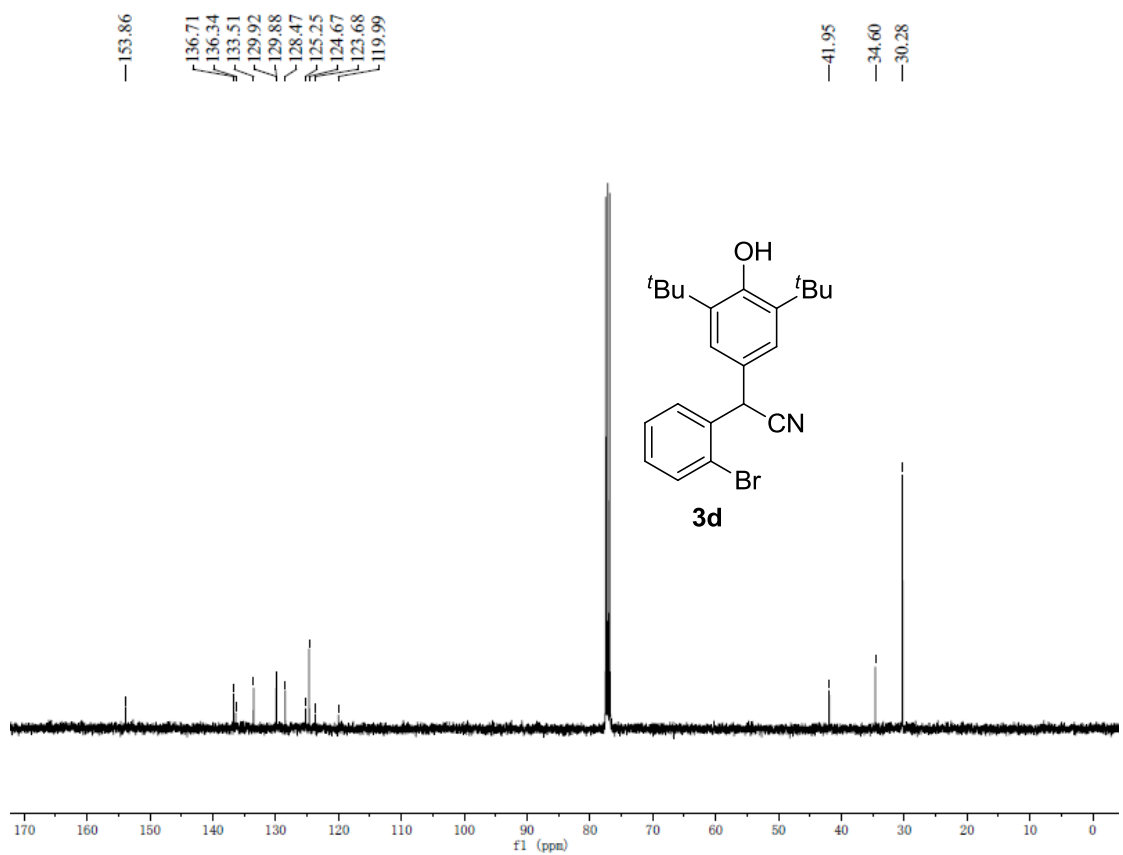

<sup>13</sup>C NMR of 3d



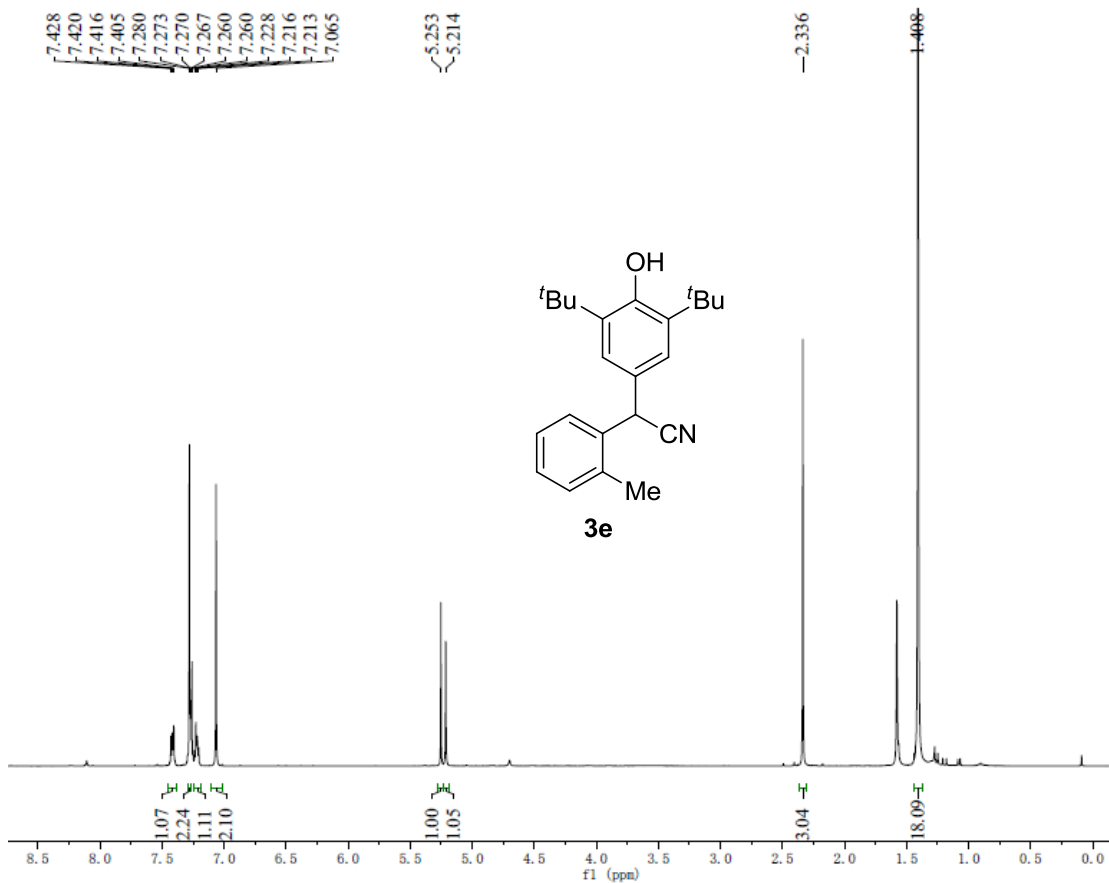

<sup>1</sup>H NMR of 3e

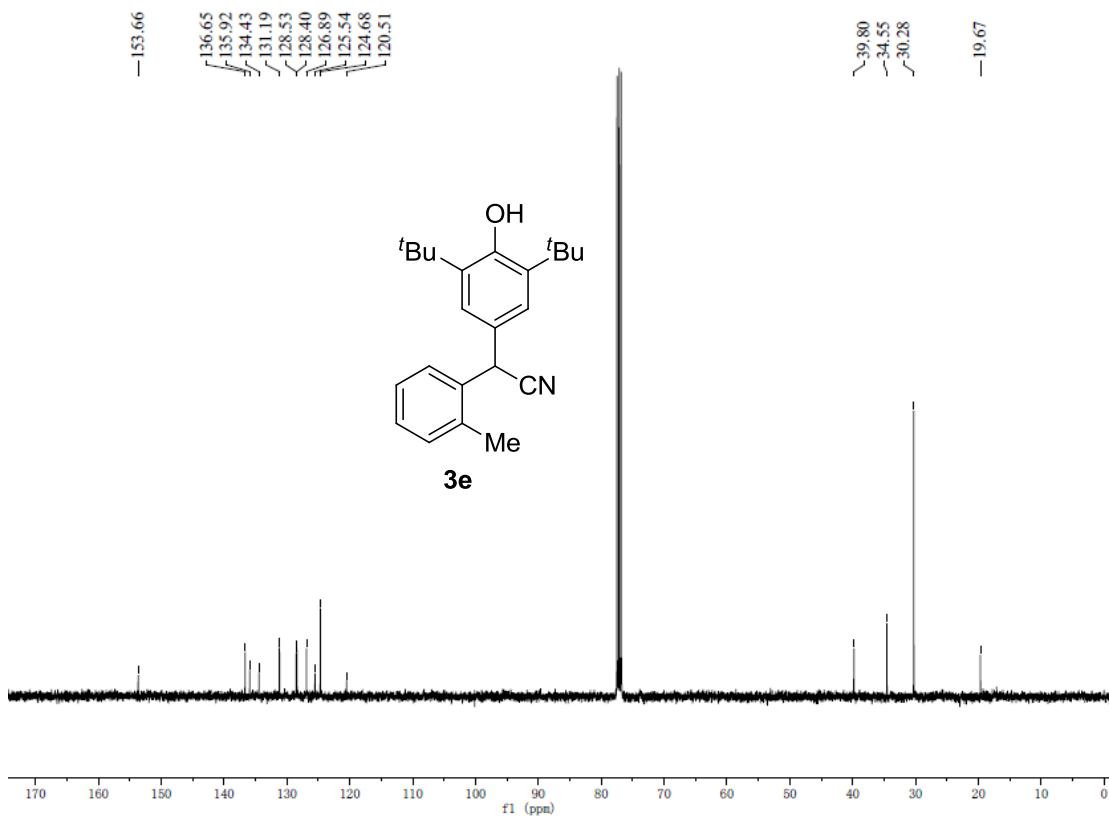

<sup>13</sup>C NMR of 3e

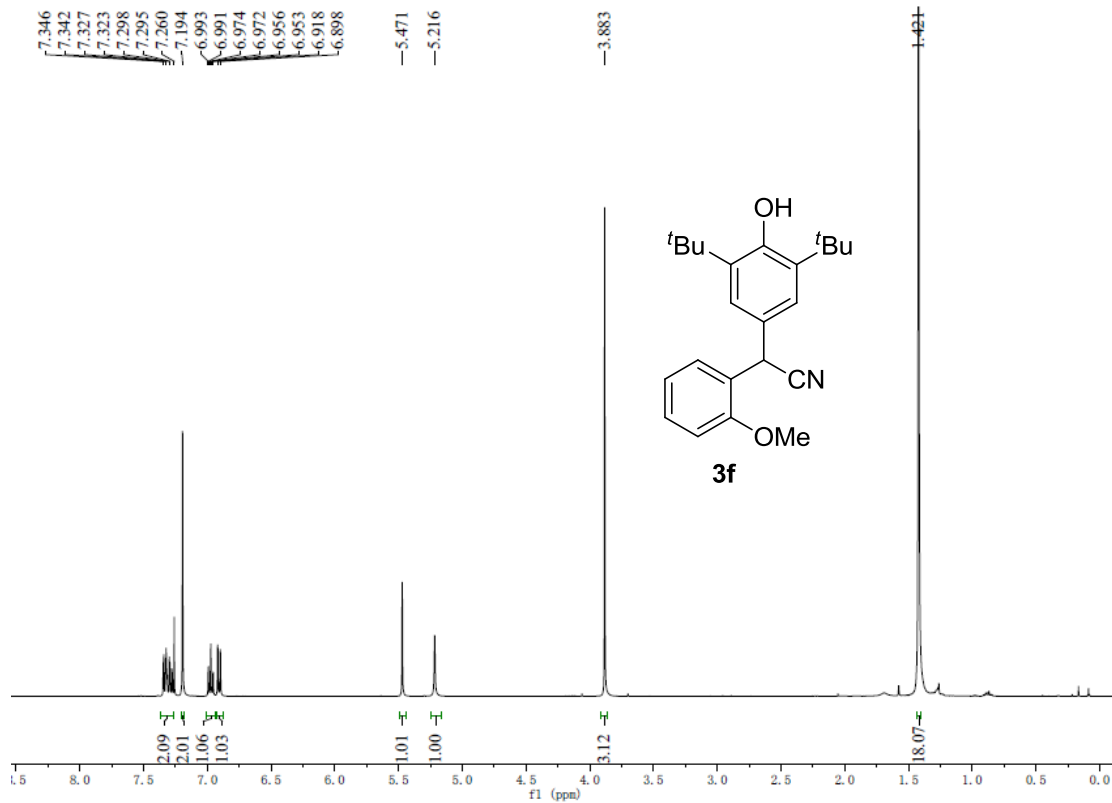

<sup>1</sup>H NMR of **3f**

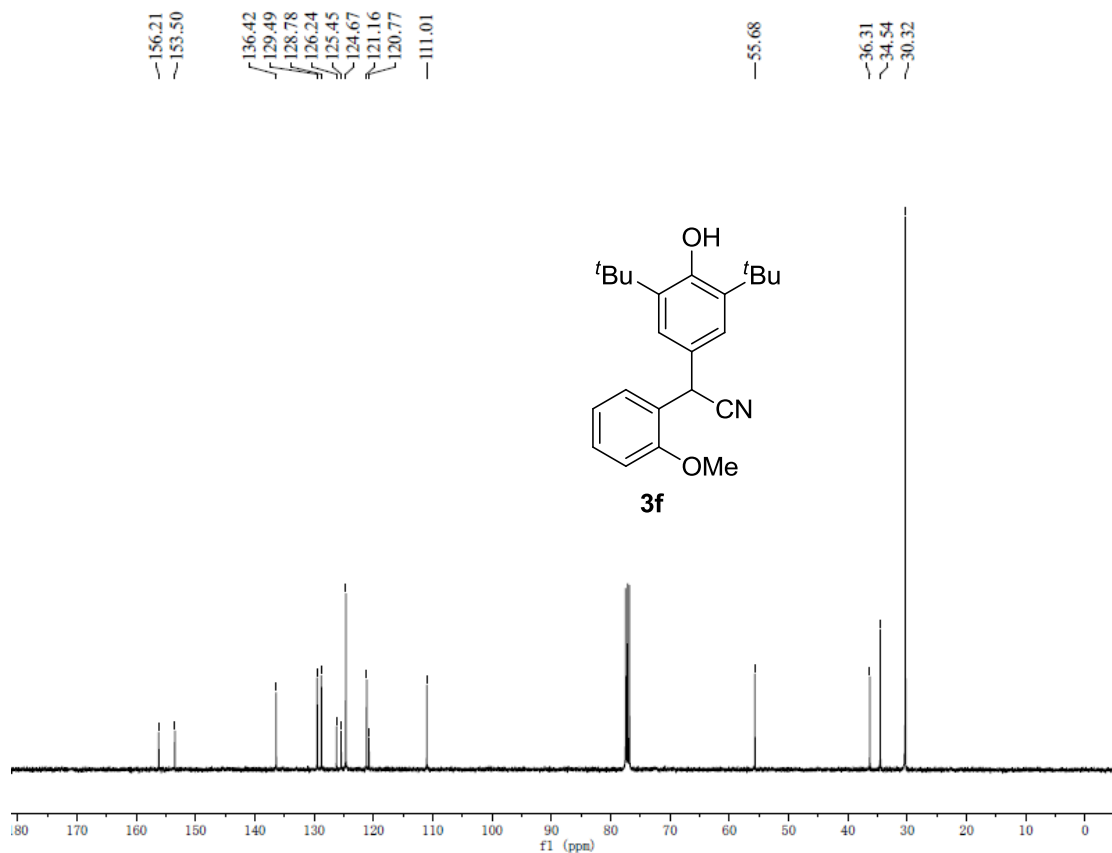

<sup>13</sup>C NMR of **3f**

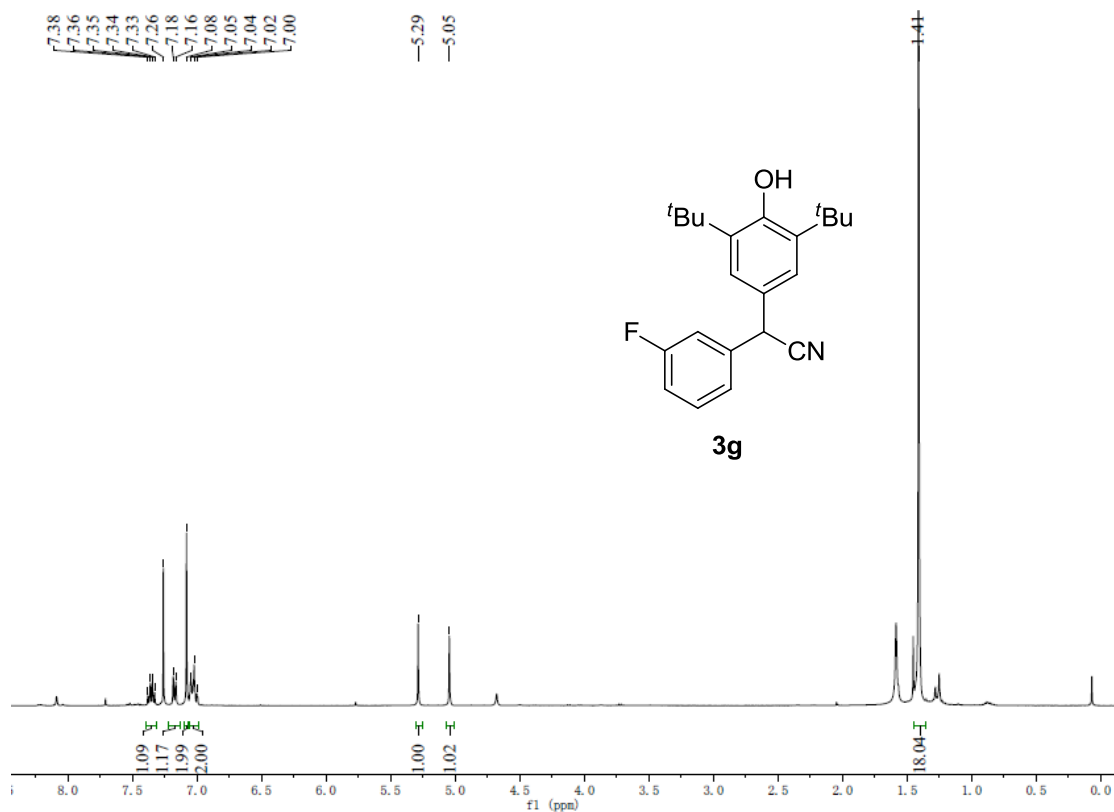

<sup>1</sup>H NMR of **3g**

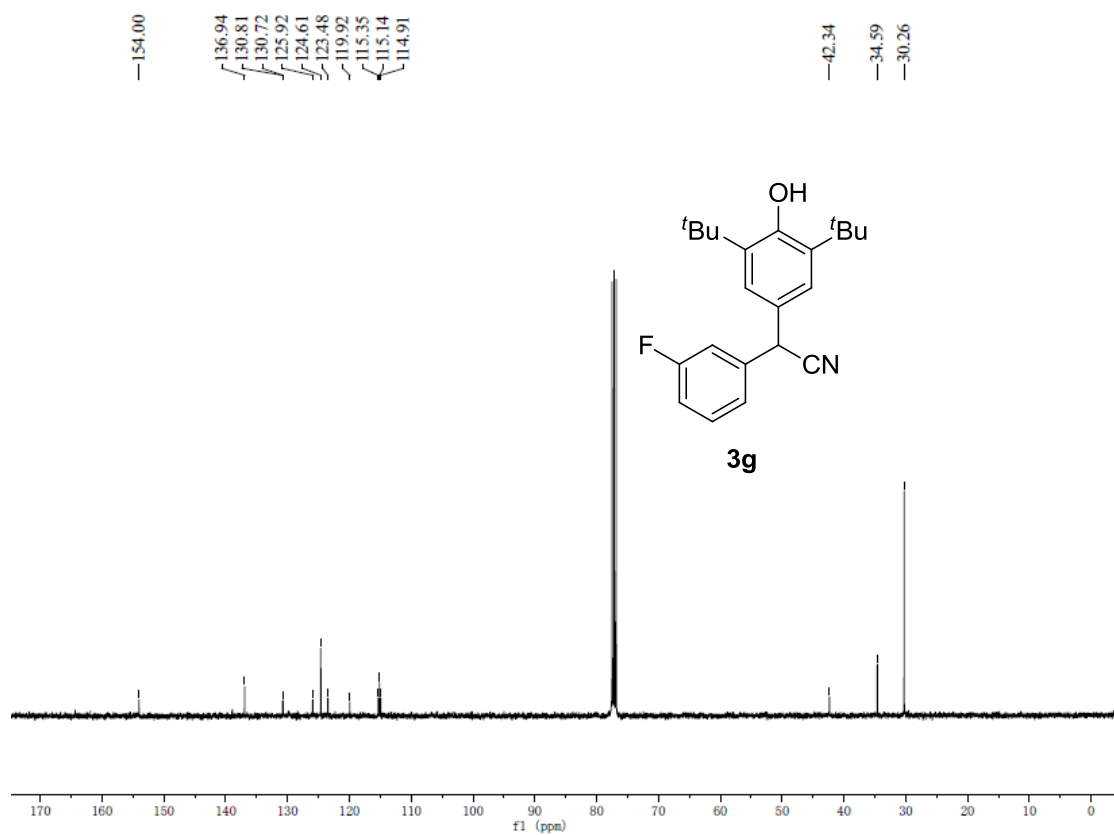

<sup>13</sup>C NMR of **3g**

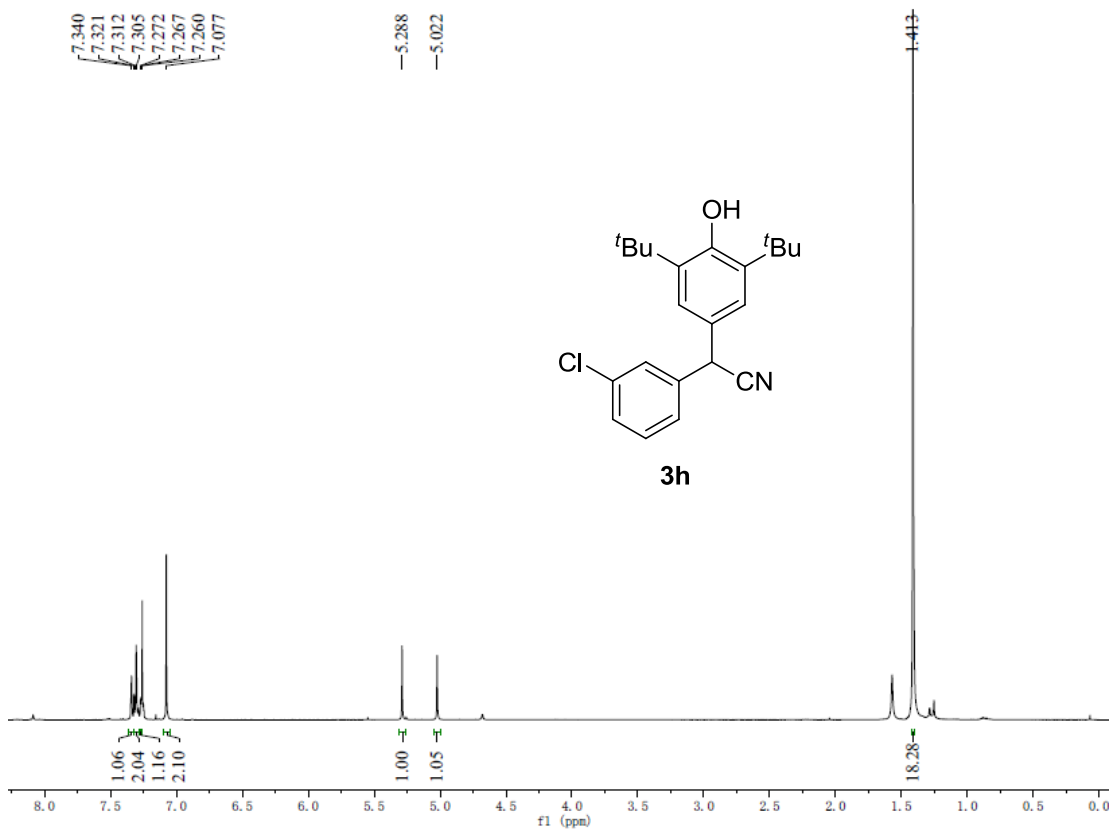

$^1\text{H NMR}$  of **3h**

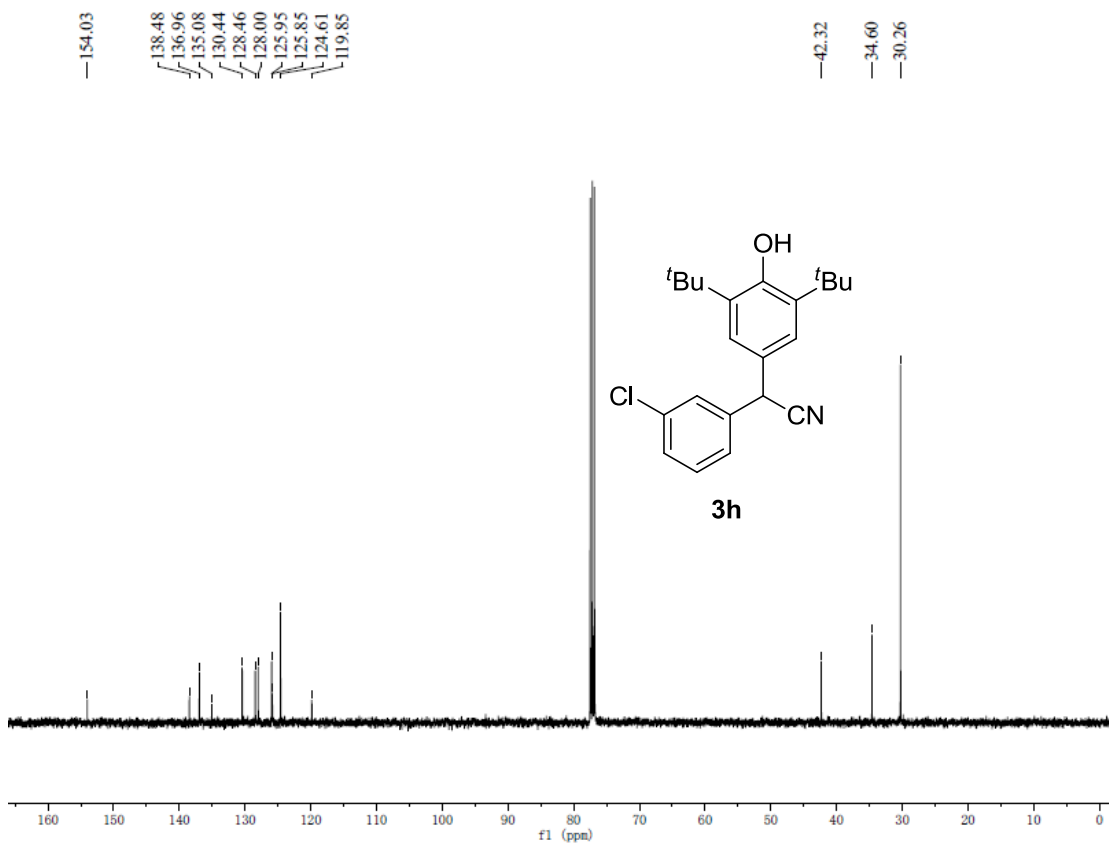

$^{13}\text{C NMR}$  of **3h**

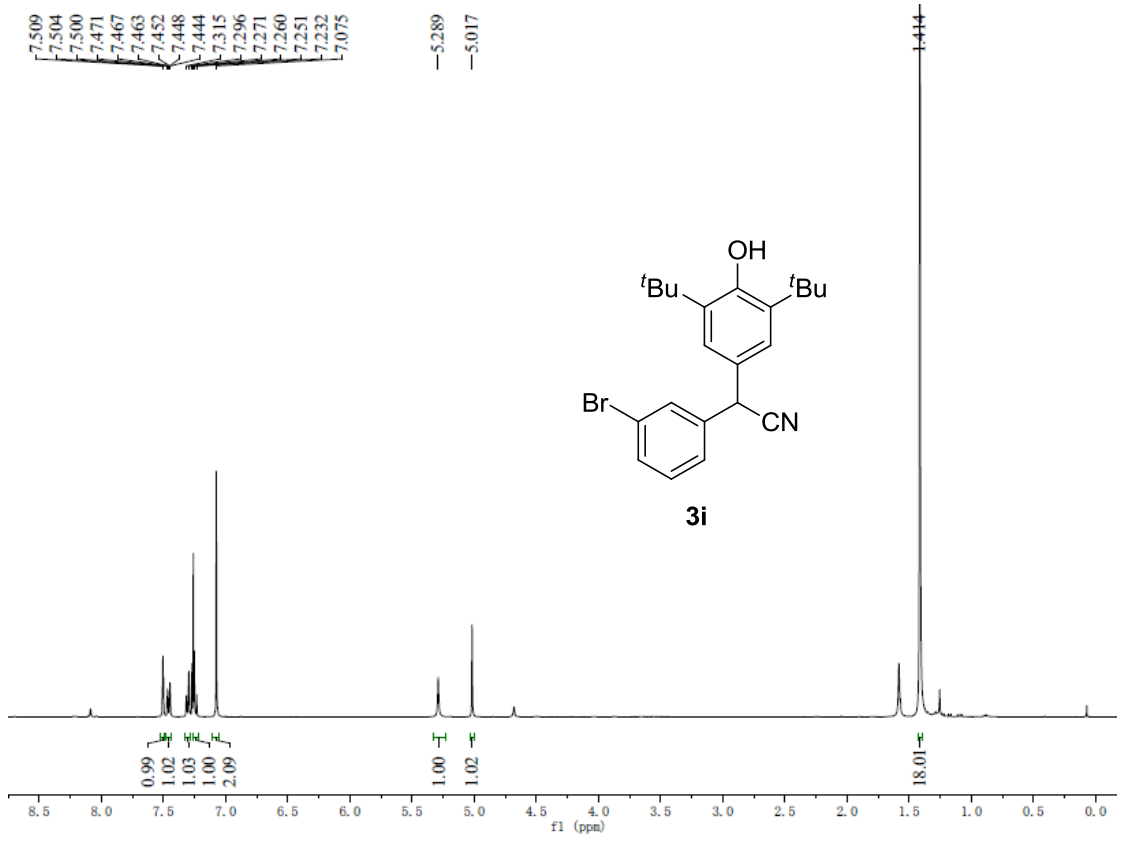

<sup>1</sup>H NMR of **3i**

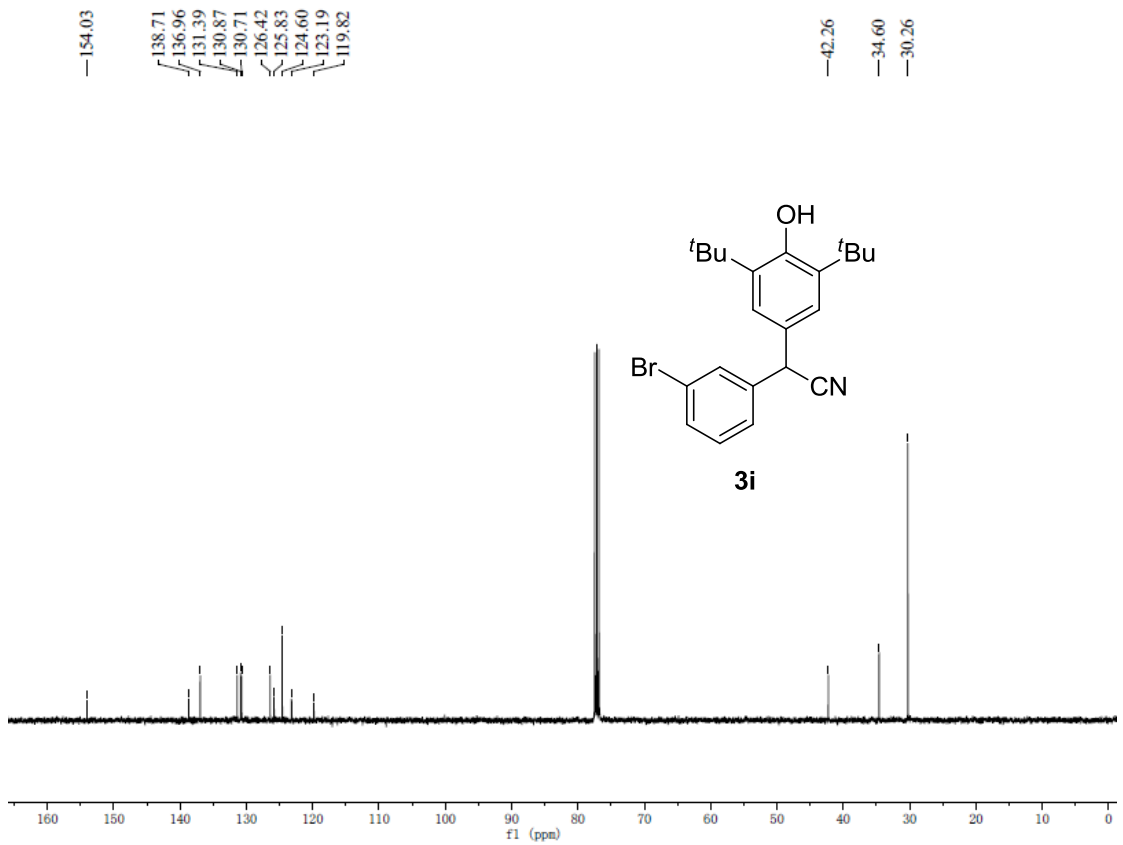

<sup>13</sup>C NMR of **3i**

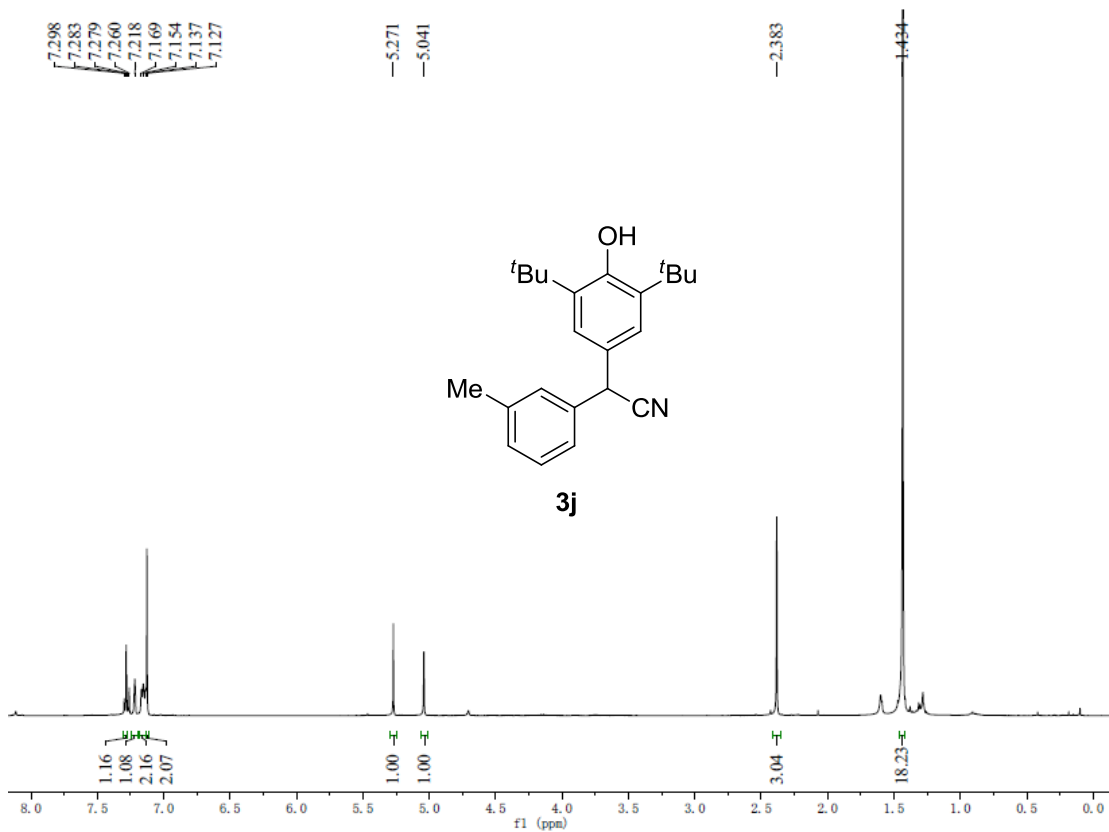

<sup>1</sup>H NMR of **3j**

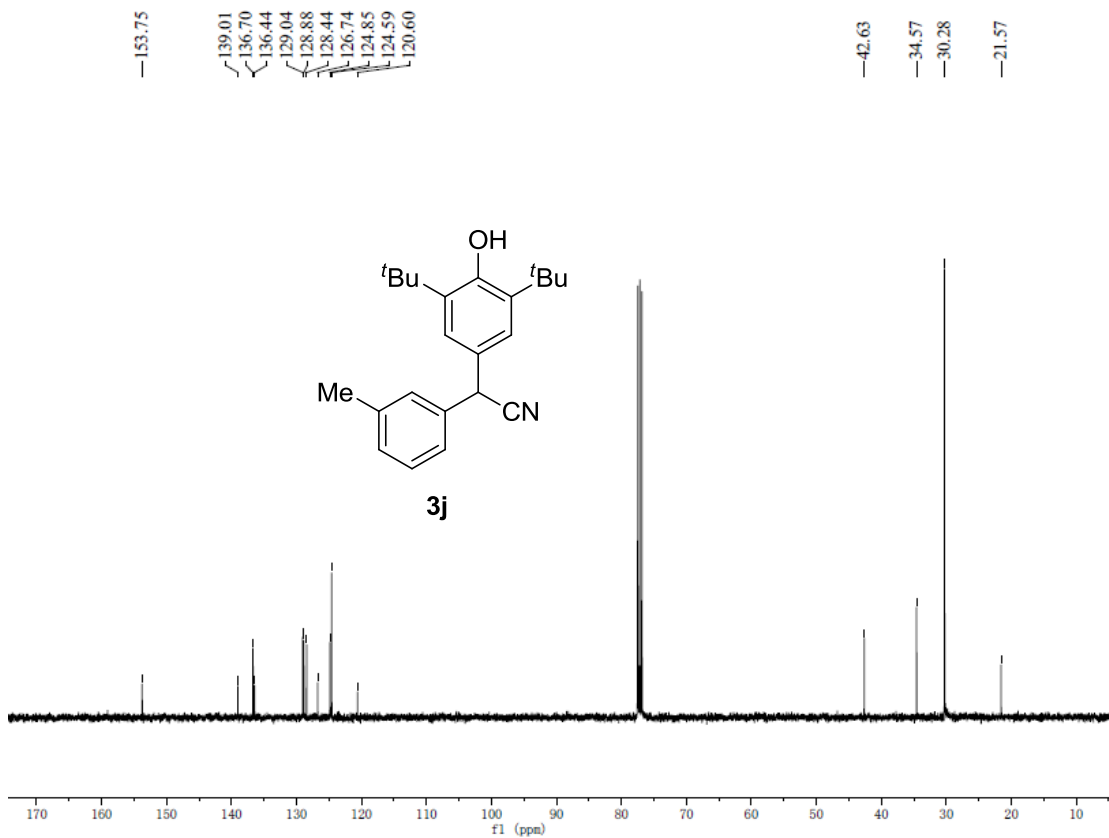

<sup>13</sup>C NMR of **3j**

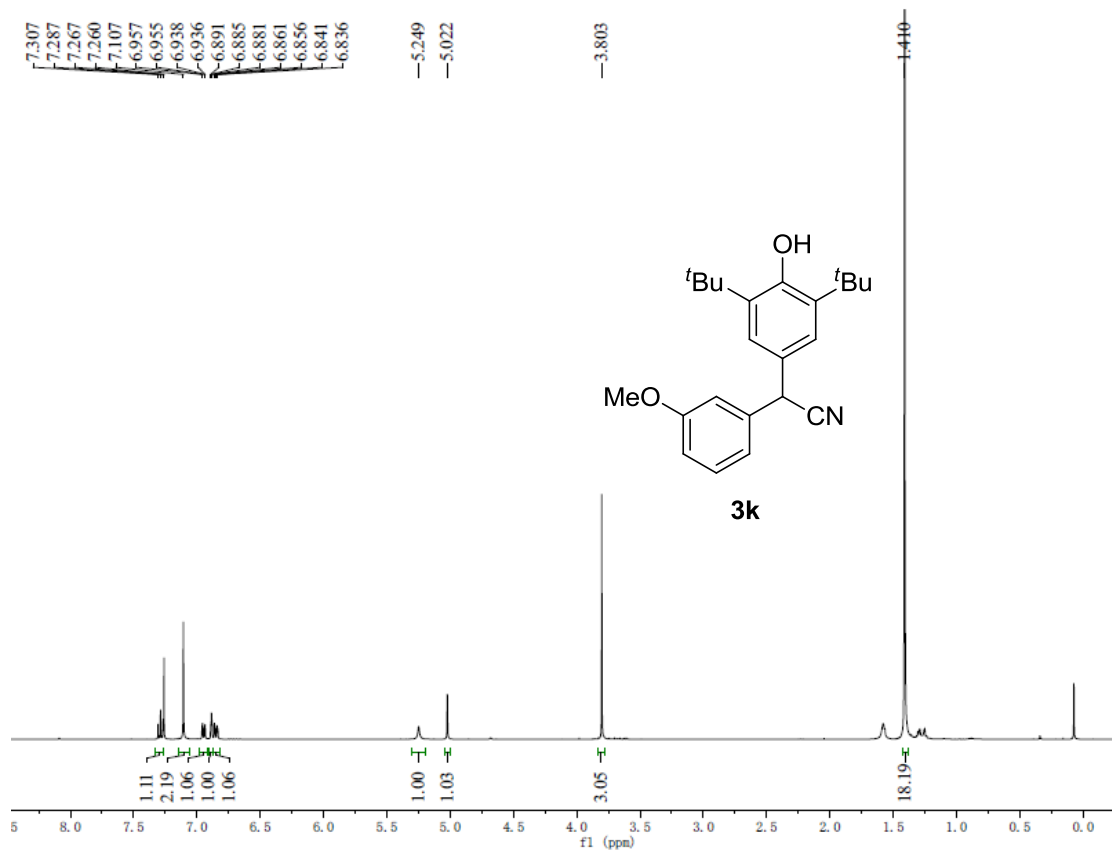

<sup>1</sup>H NMR of **3k**

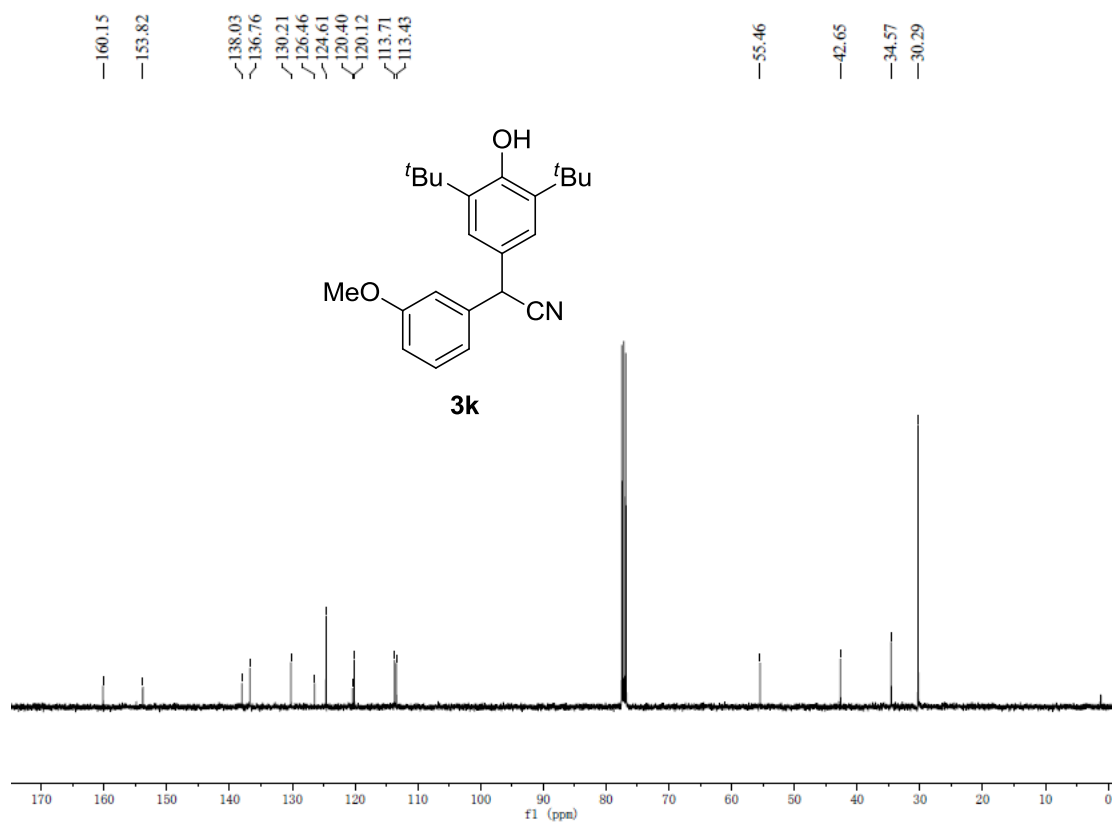

<sup>13</sup>C NMR of **3k**

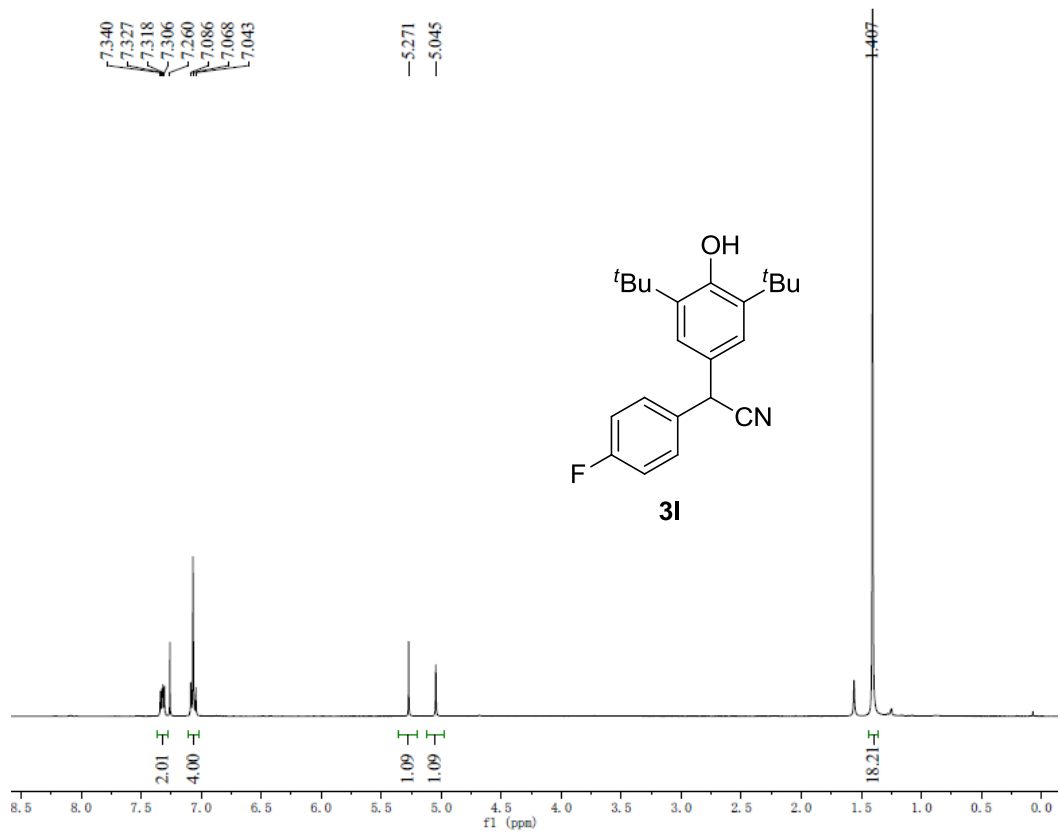

<sup>1</sup>H NMR of 3I

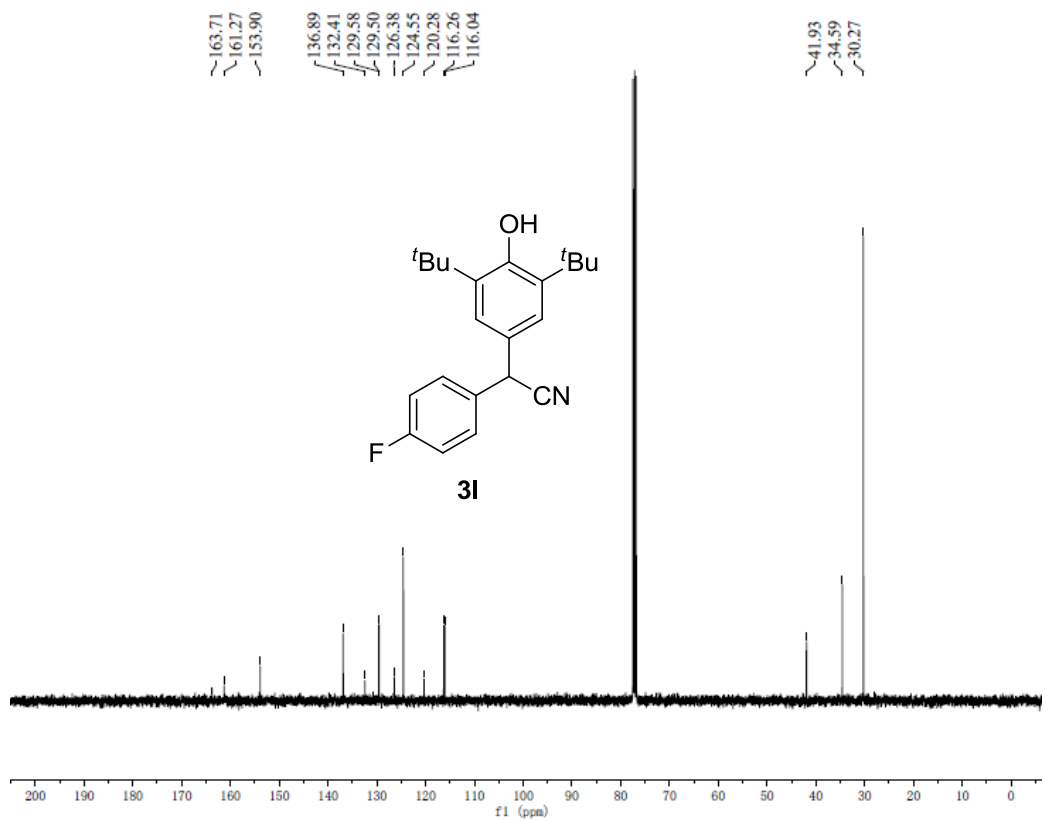

<sup>13</sup>C NMR of 3I



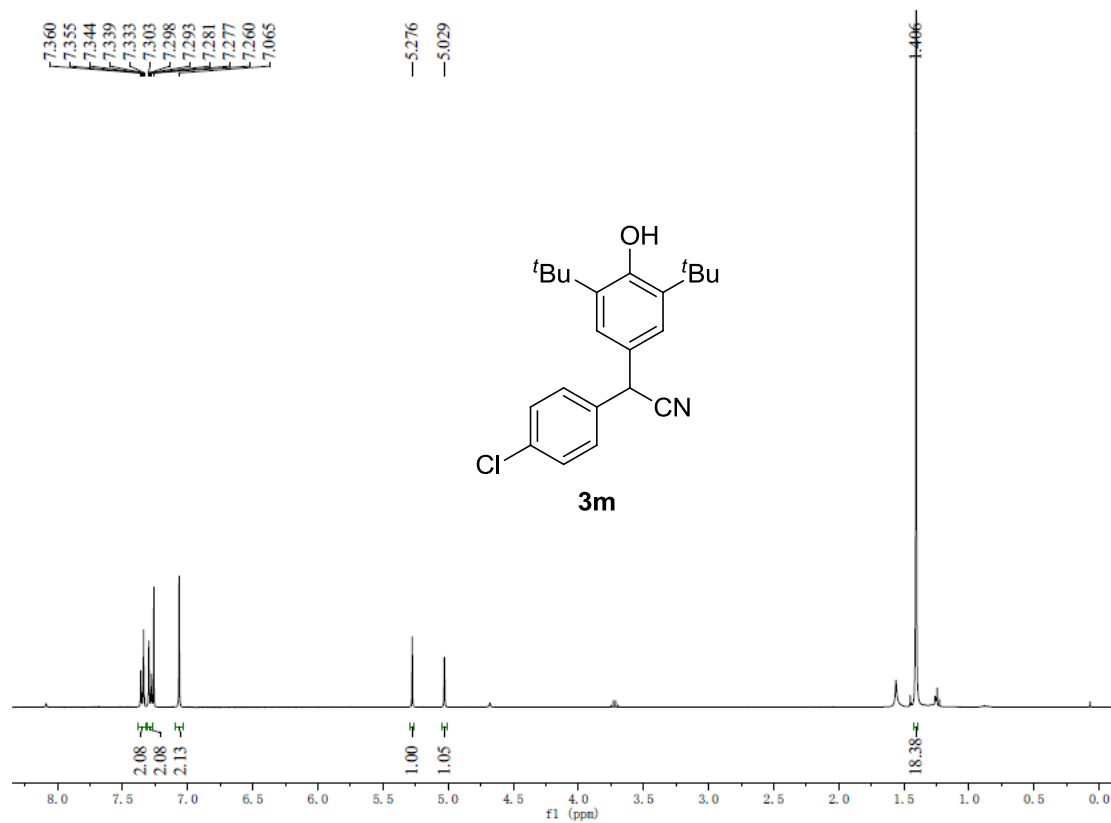

<sup>1</sup>H NMR of 3m

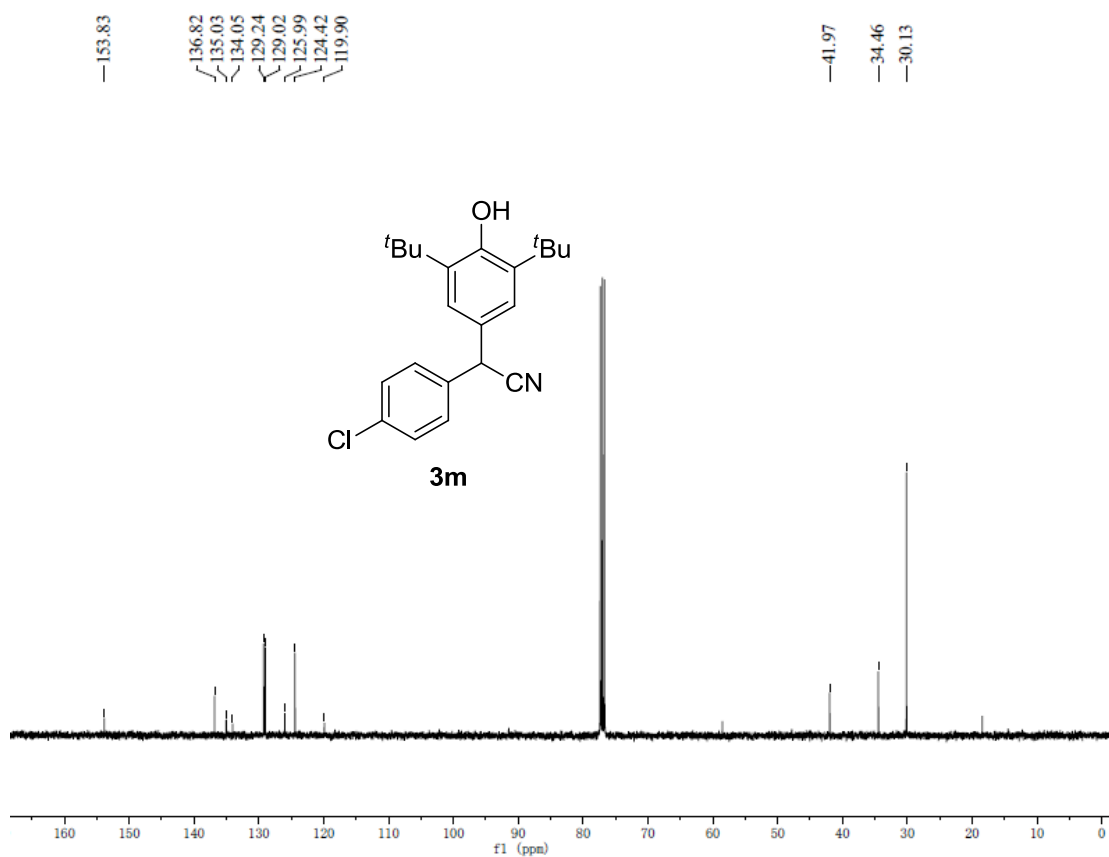

<sup>13</sup>C NMR of 3m

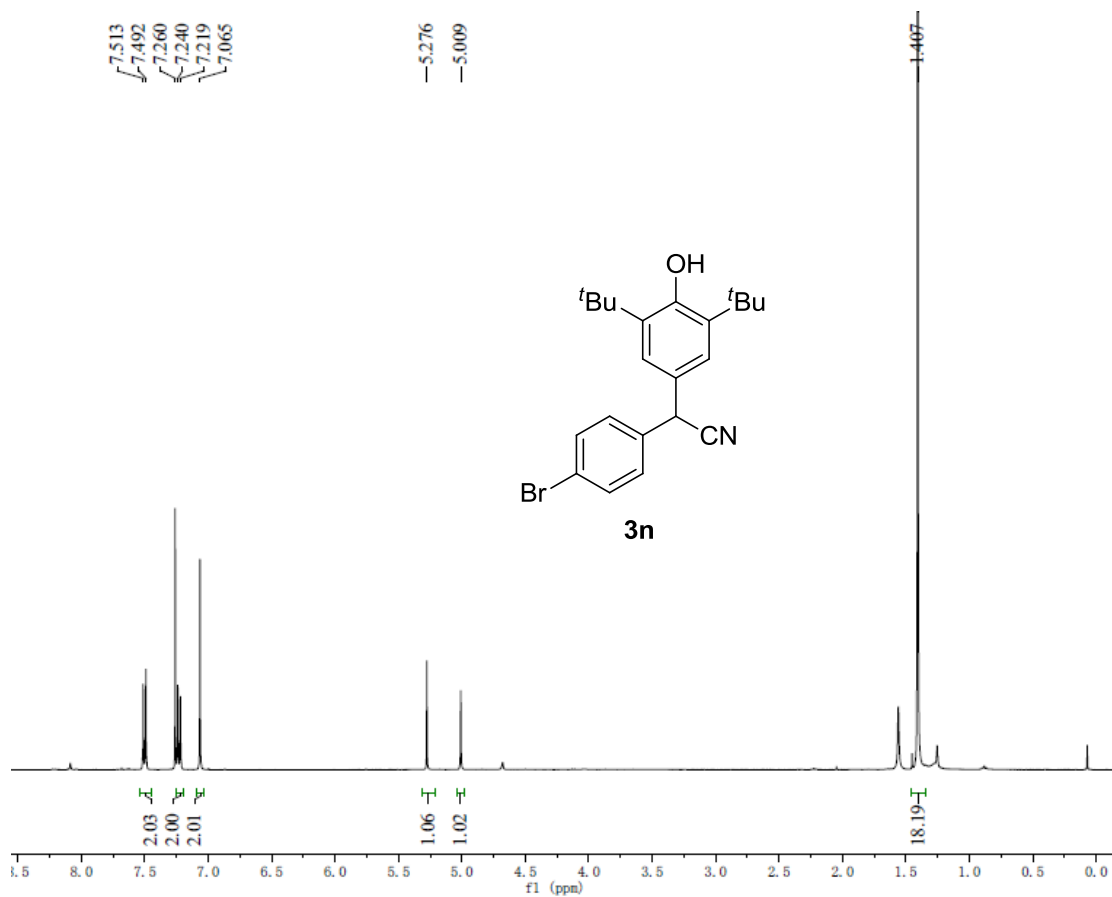

<sup>1</sup>H NMR of **3n**

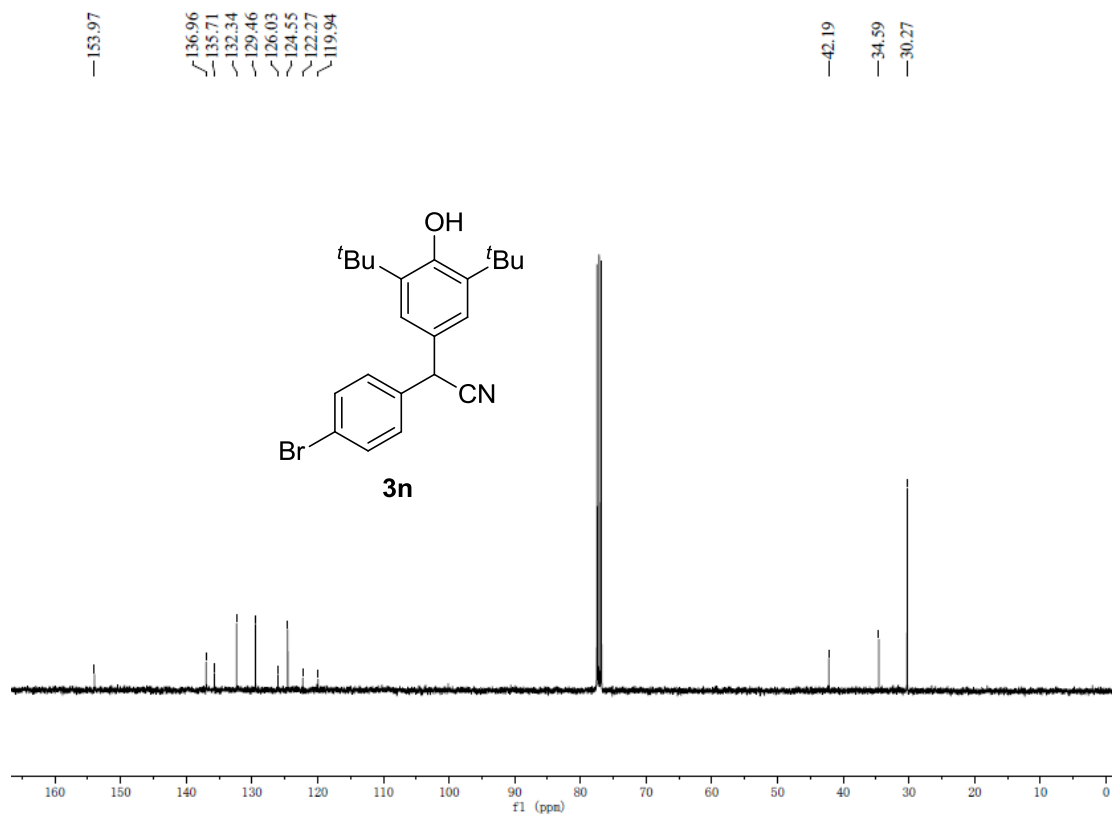

<sup>13</sup>C NMR of **3n**

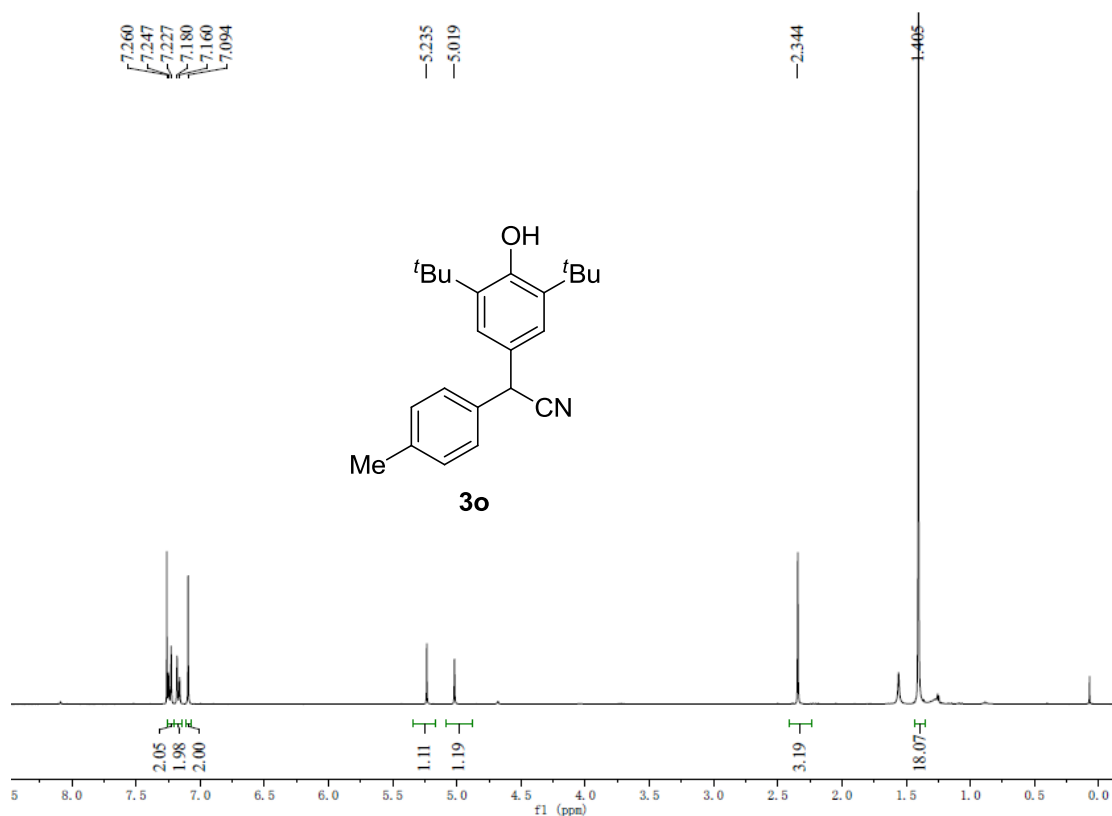

<sup>1</sup>H NMR of **3o**

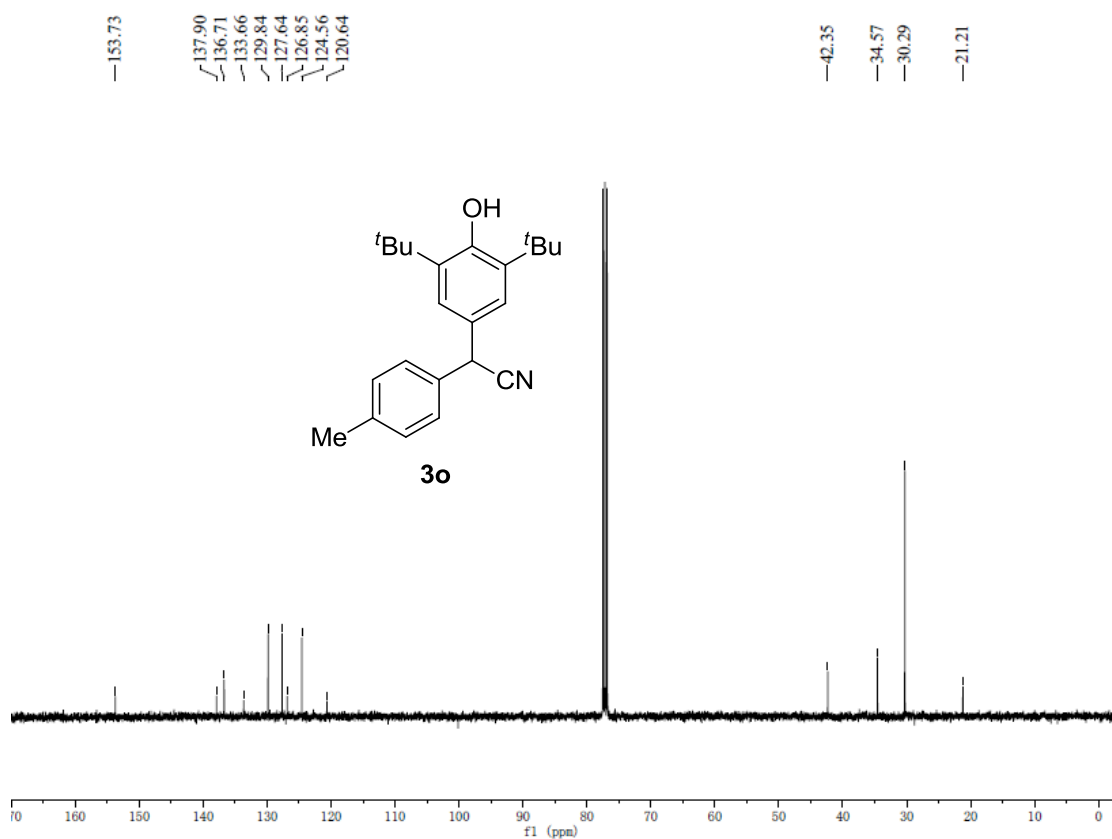

<sup>13</sup>C NMR of **3o**

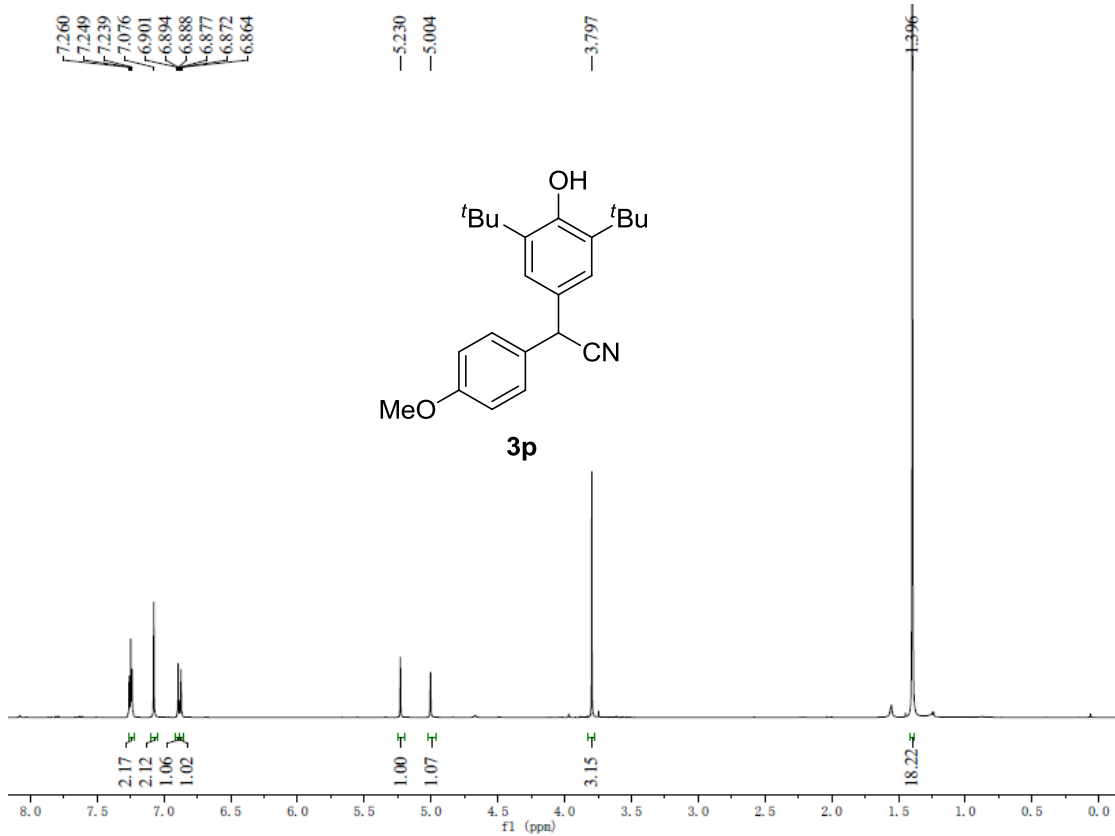

<sup>1</sup>H NMR of 3p

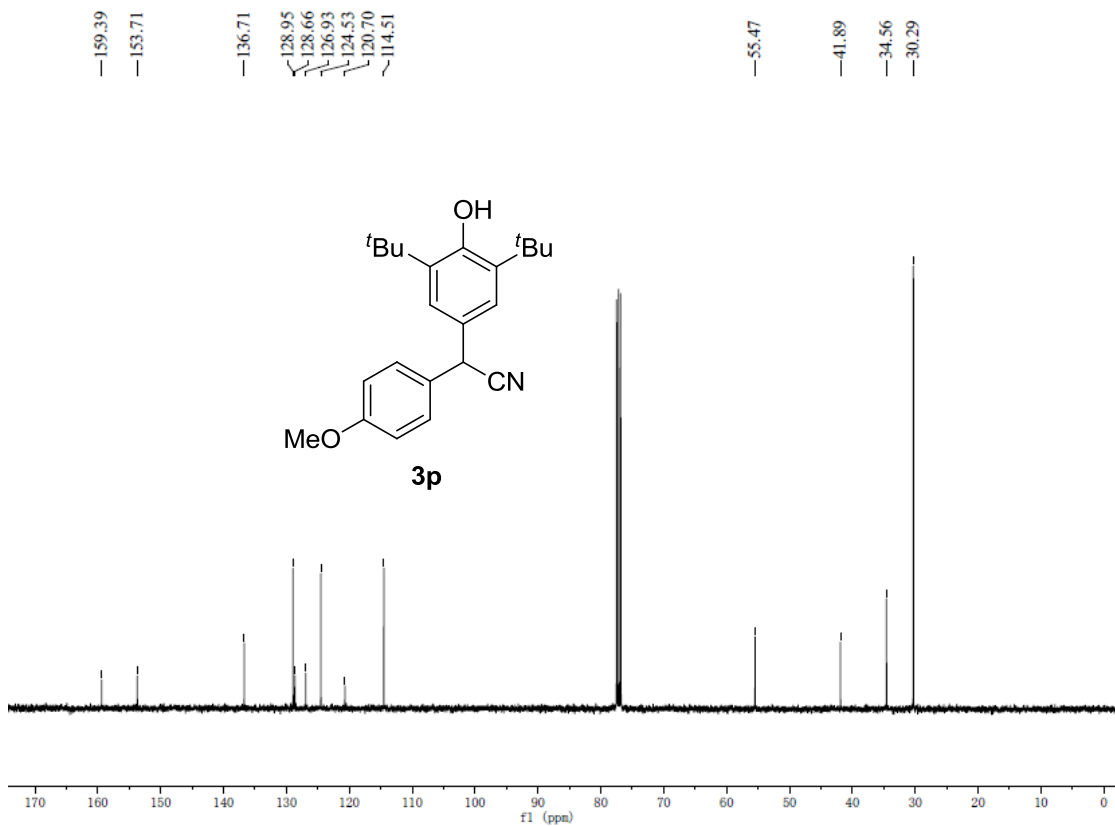

<sup>13</sup>C NMR of 3p

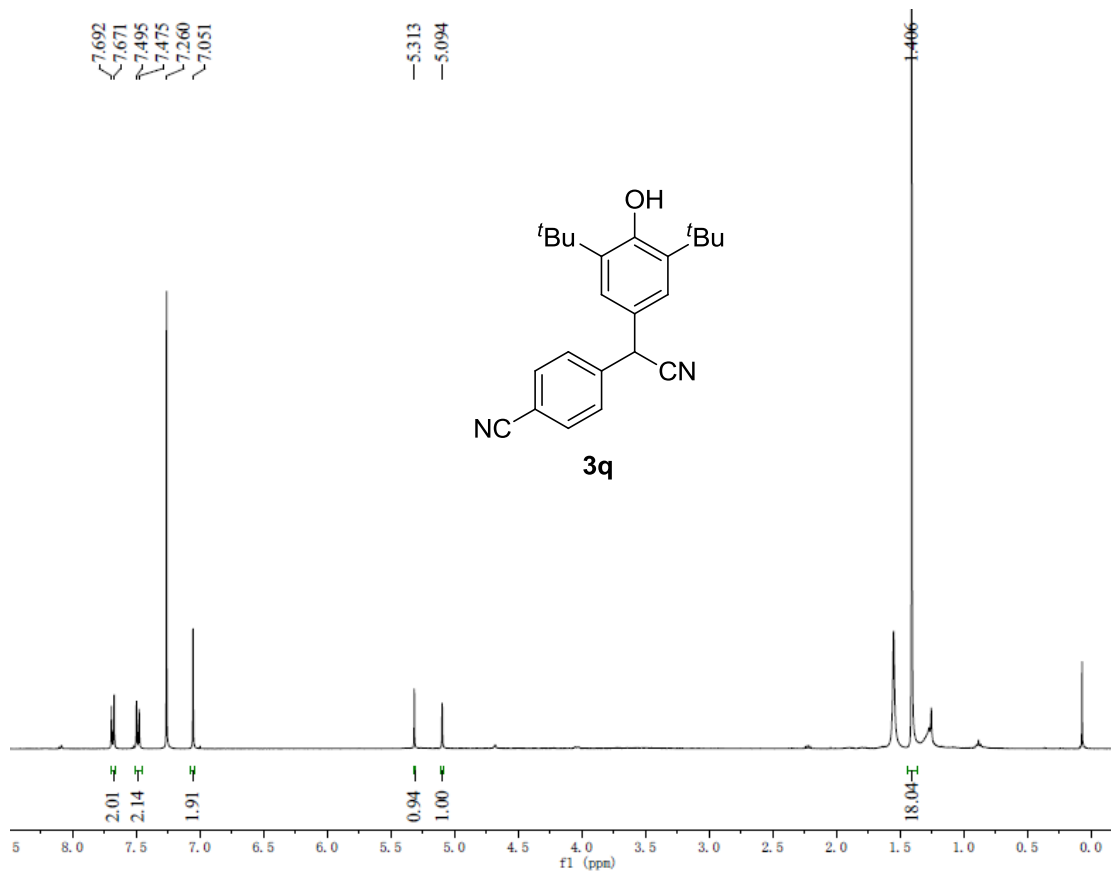

<sup>1</sup>H NMR of 3q

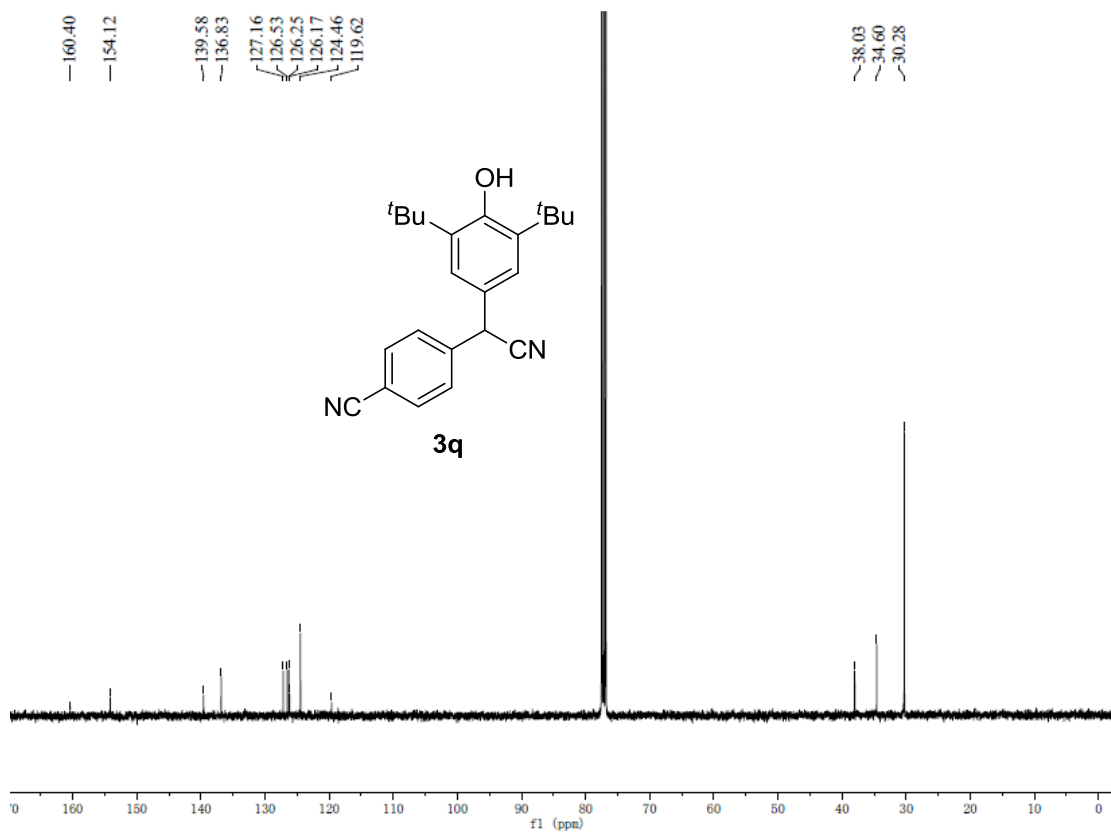

<sup>13</sup>C NMR of 3q

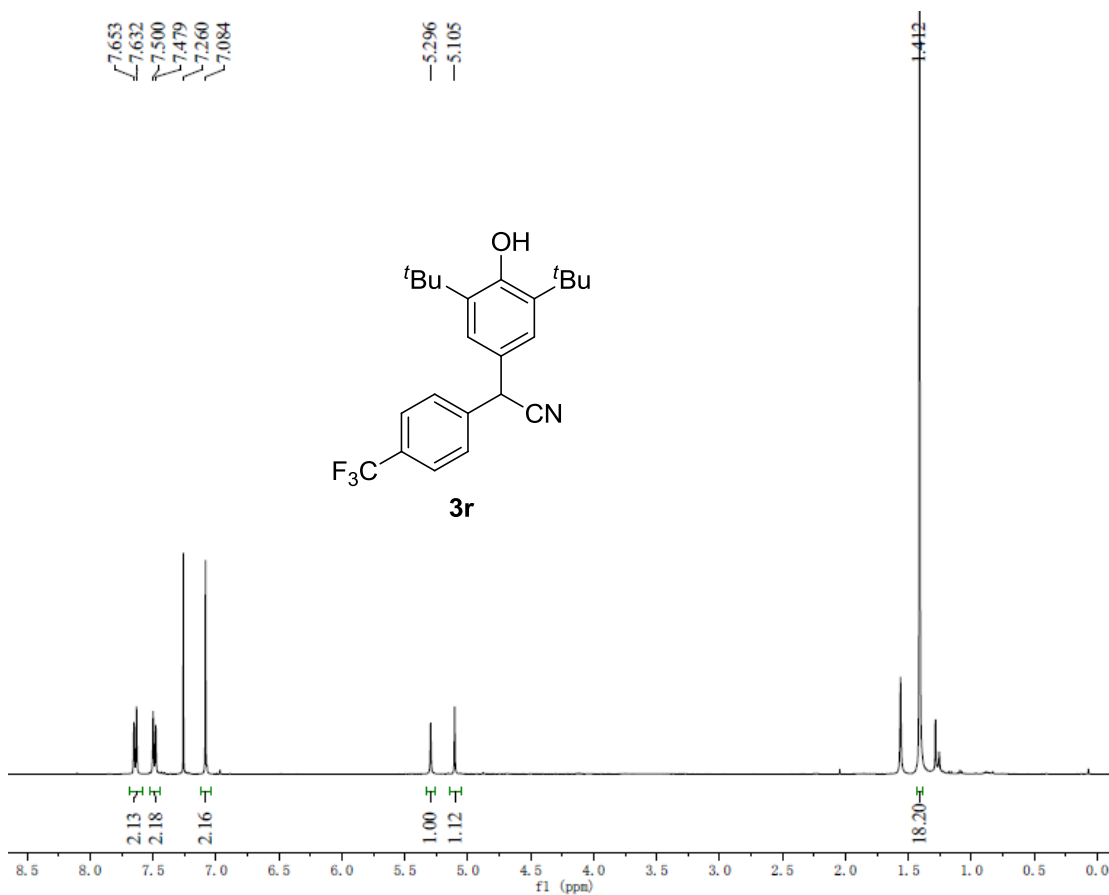

<sup>1</sup>H NMR of **3r**

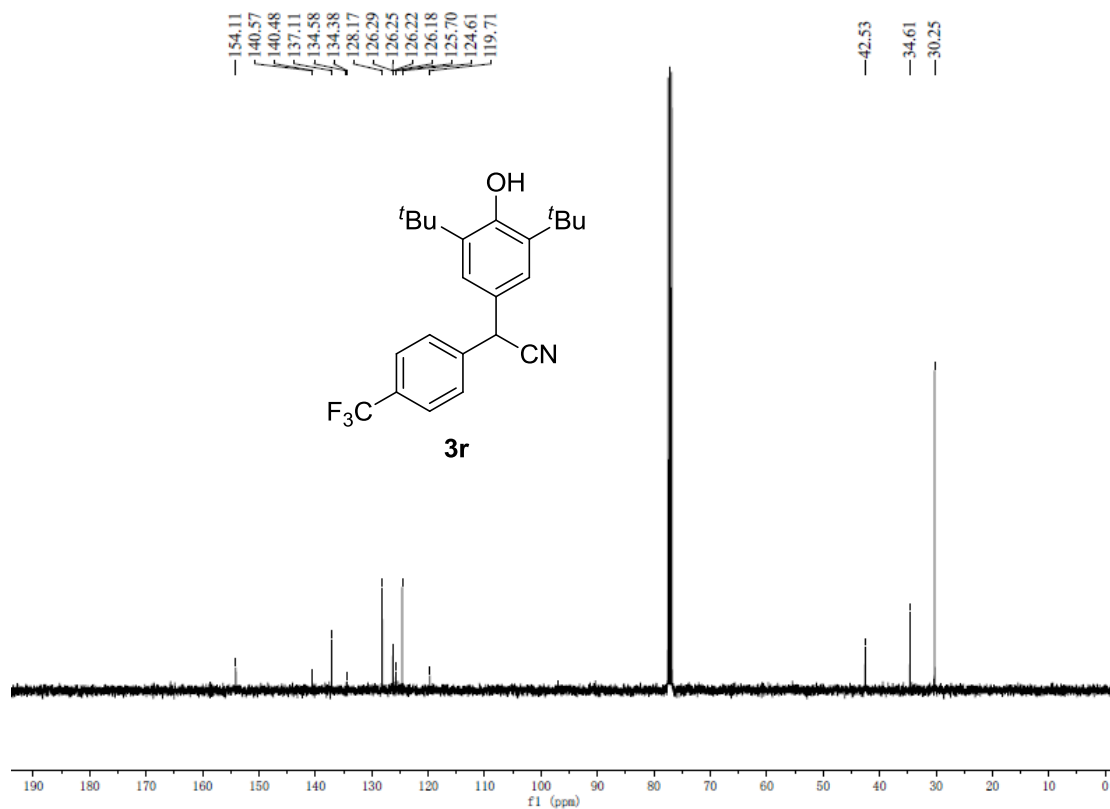

<sup>13</sup>C NMR of **3r**

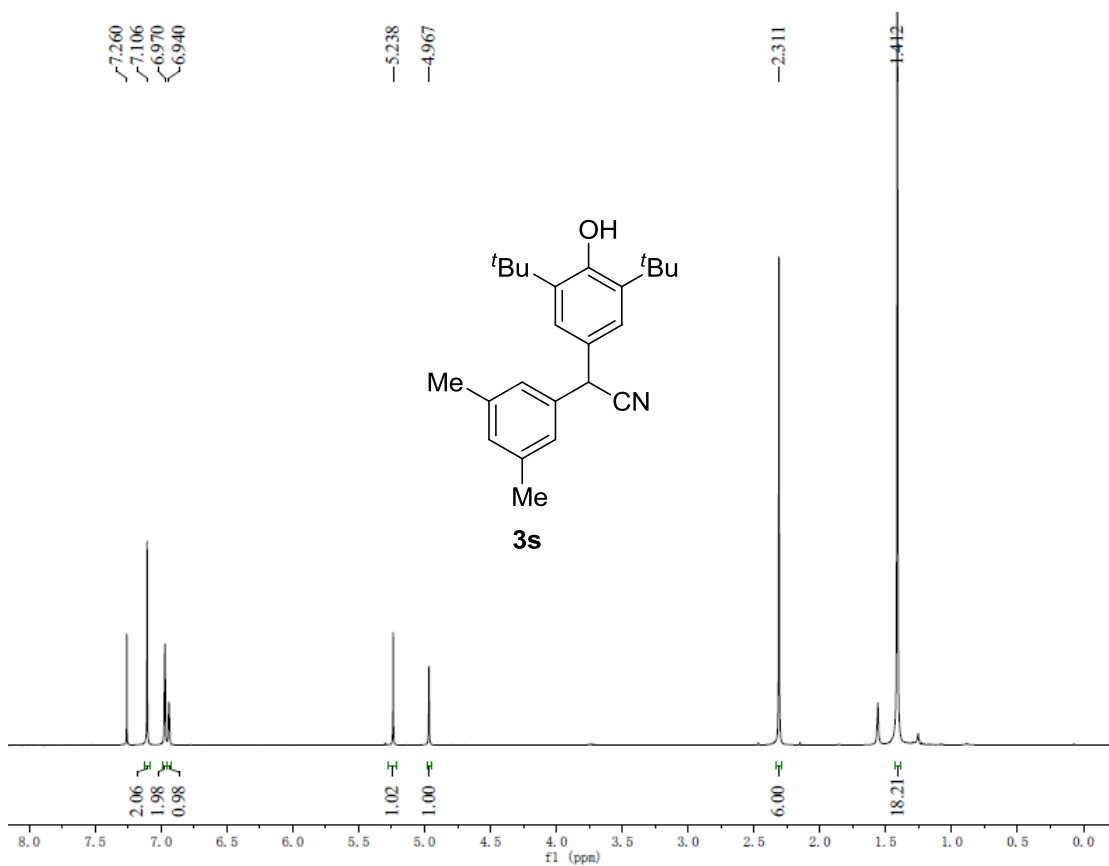

<sup>1</sup>H NMR of 3s

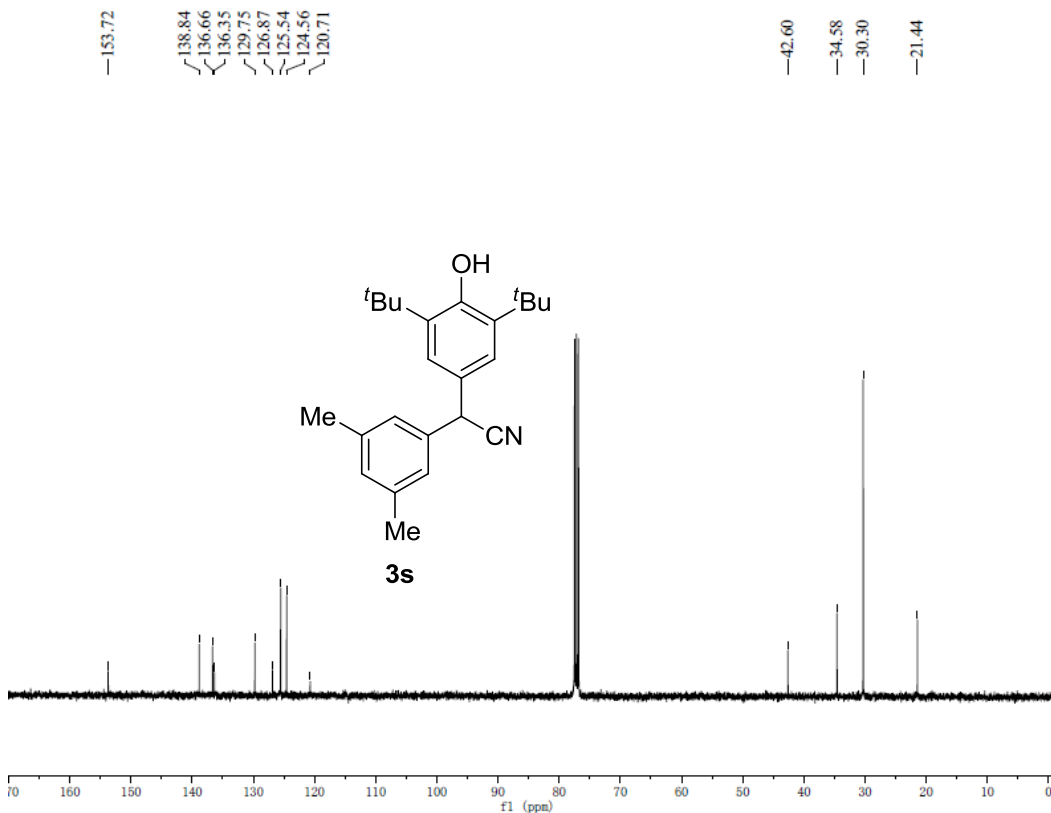

<sup>13</sup>C NMR of 3s

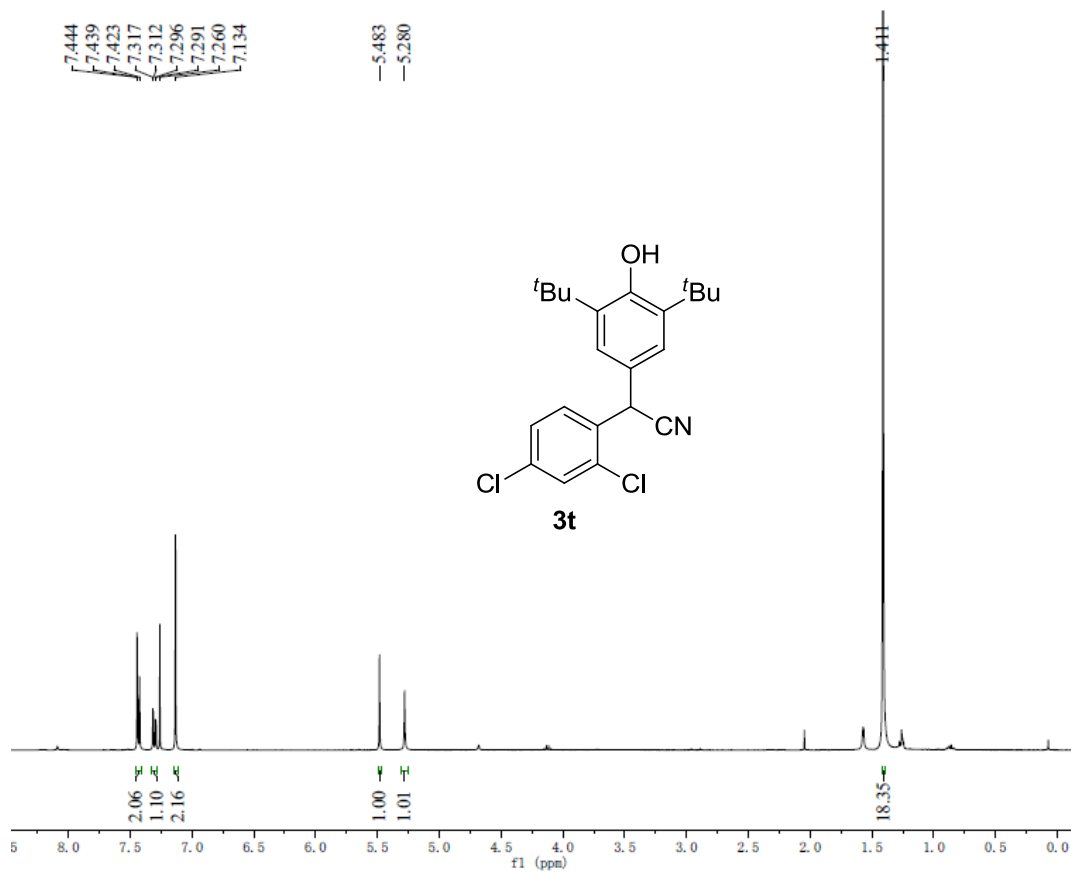

<sup>1</sup>H NMR of 3t

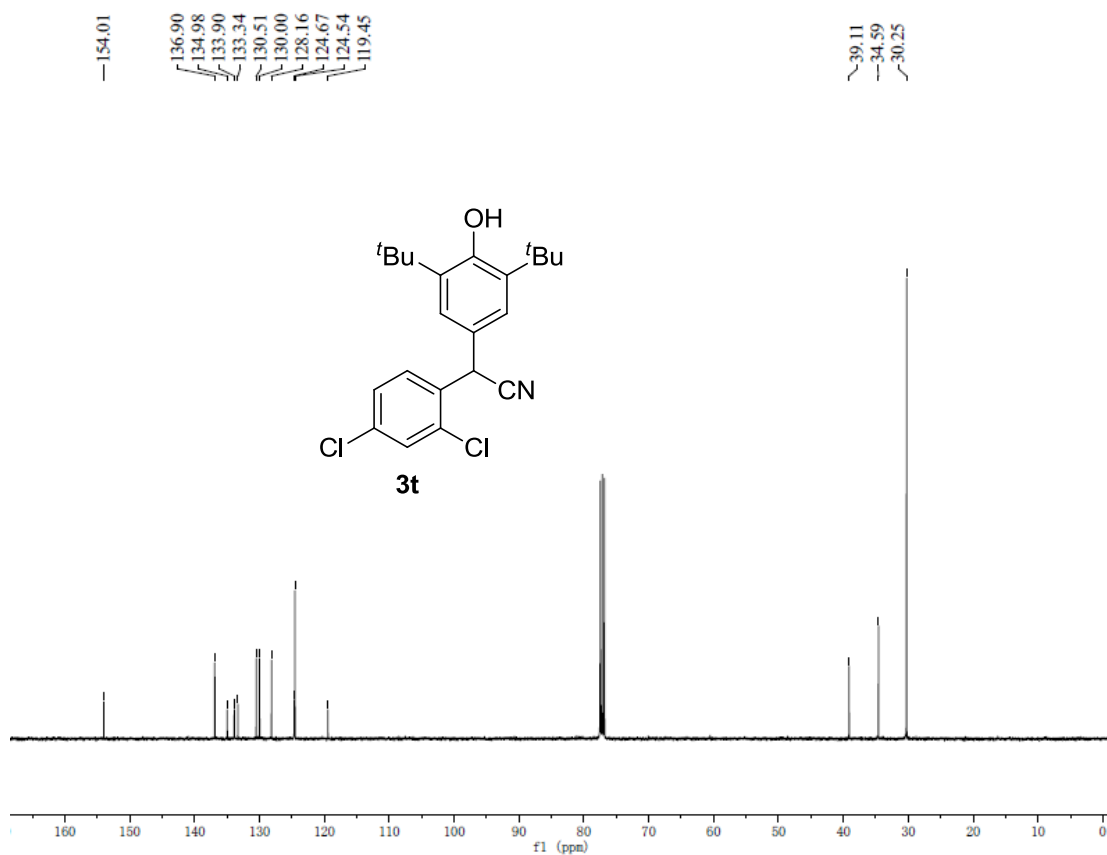

<sup>13</sup>C NMR of 3t



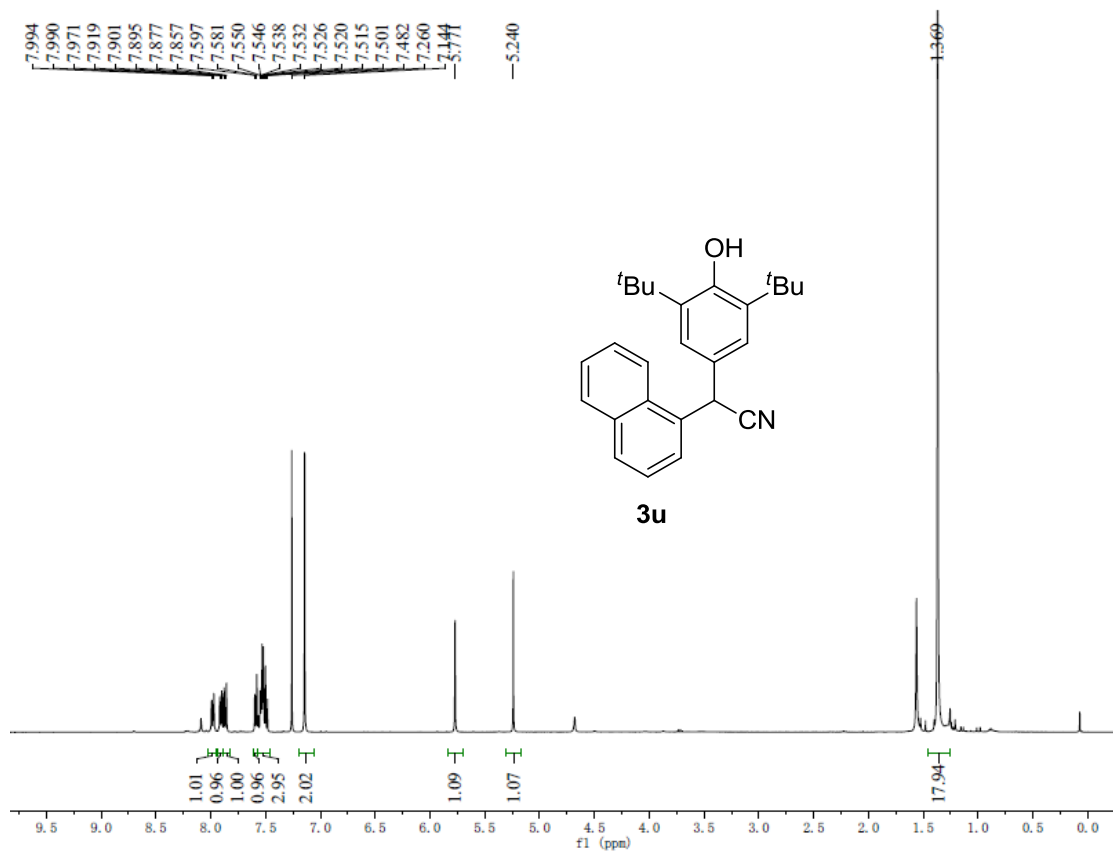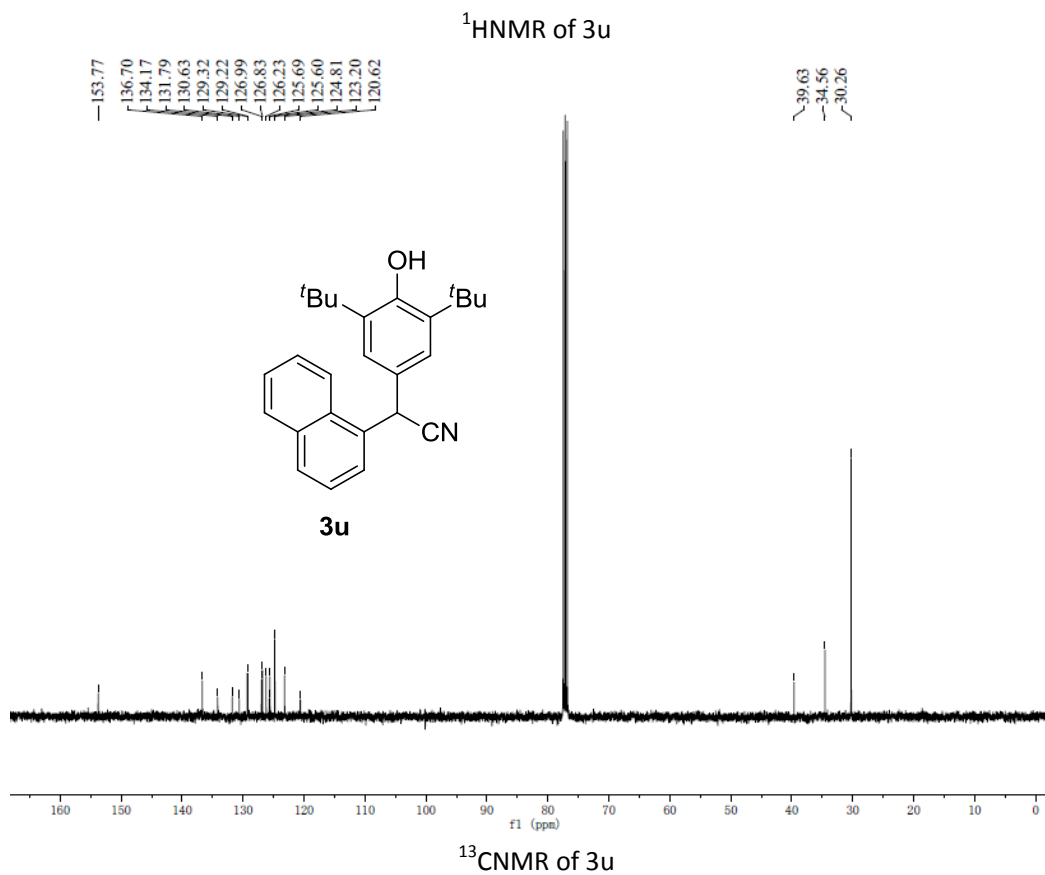

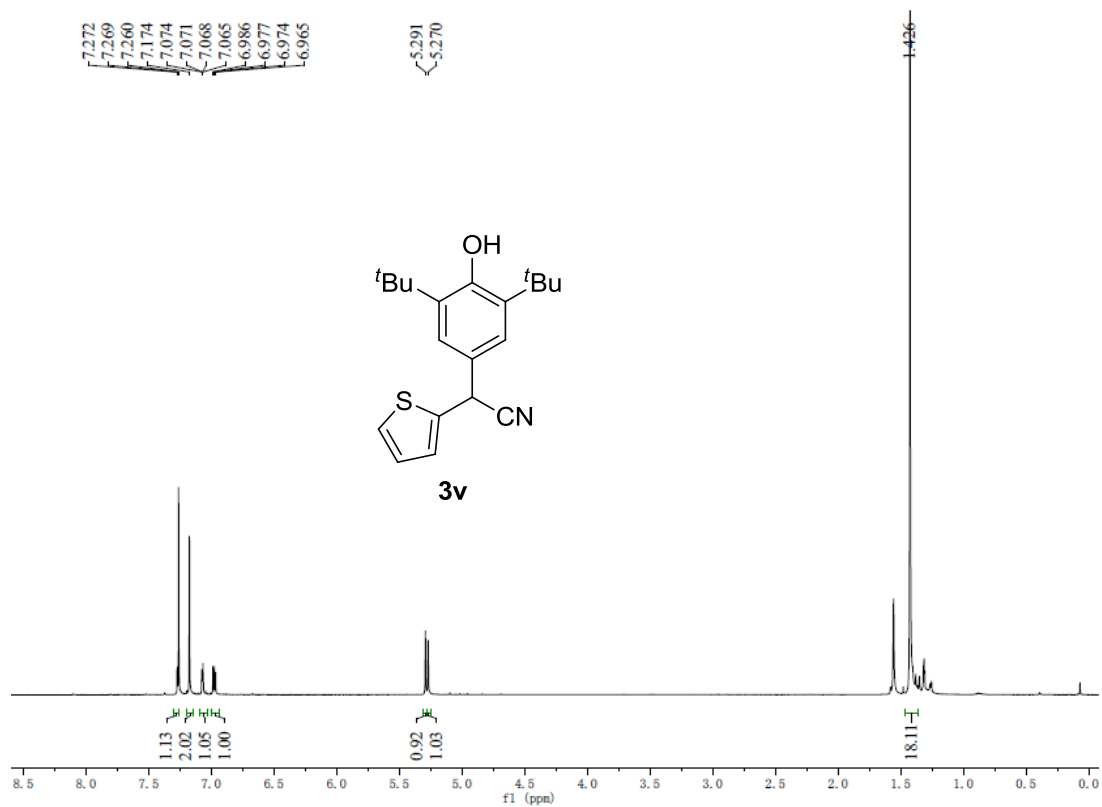

<sup>1</sup>H NMR of **3v**

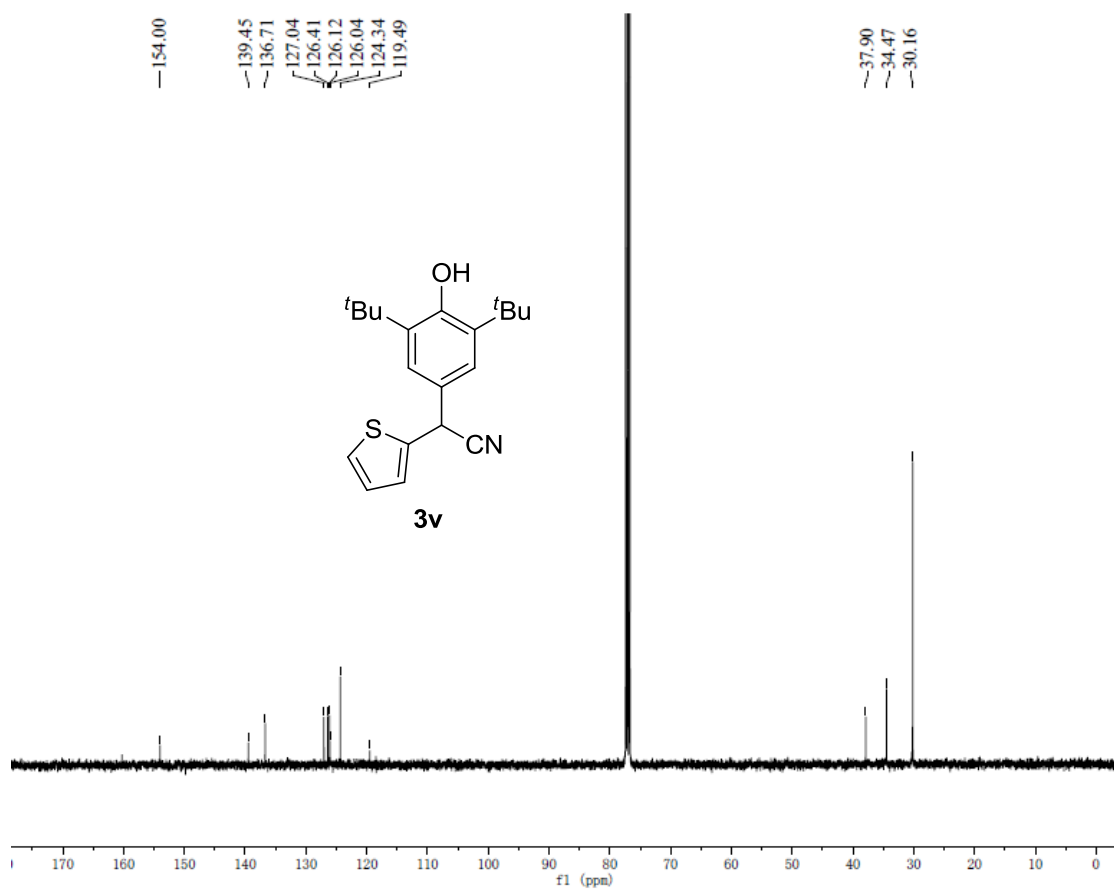

<sup>13</sup>C NMR of **3v**

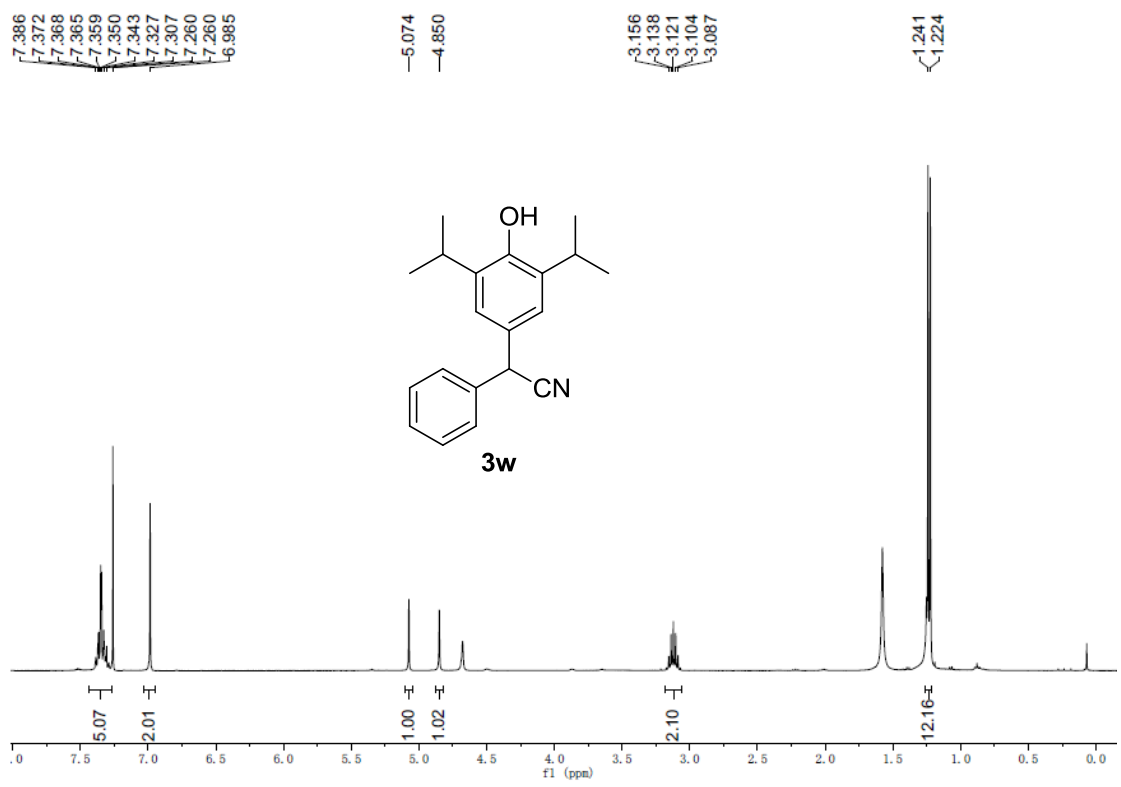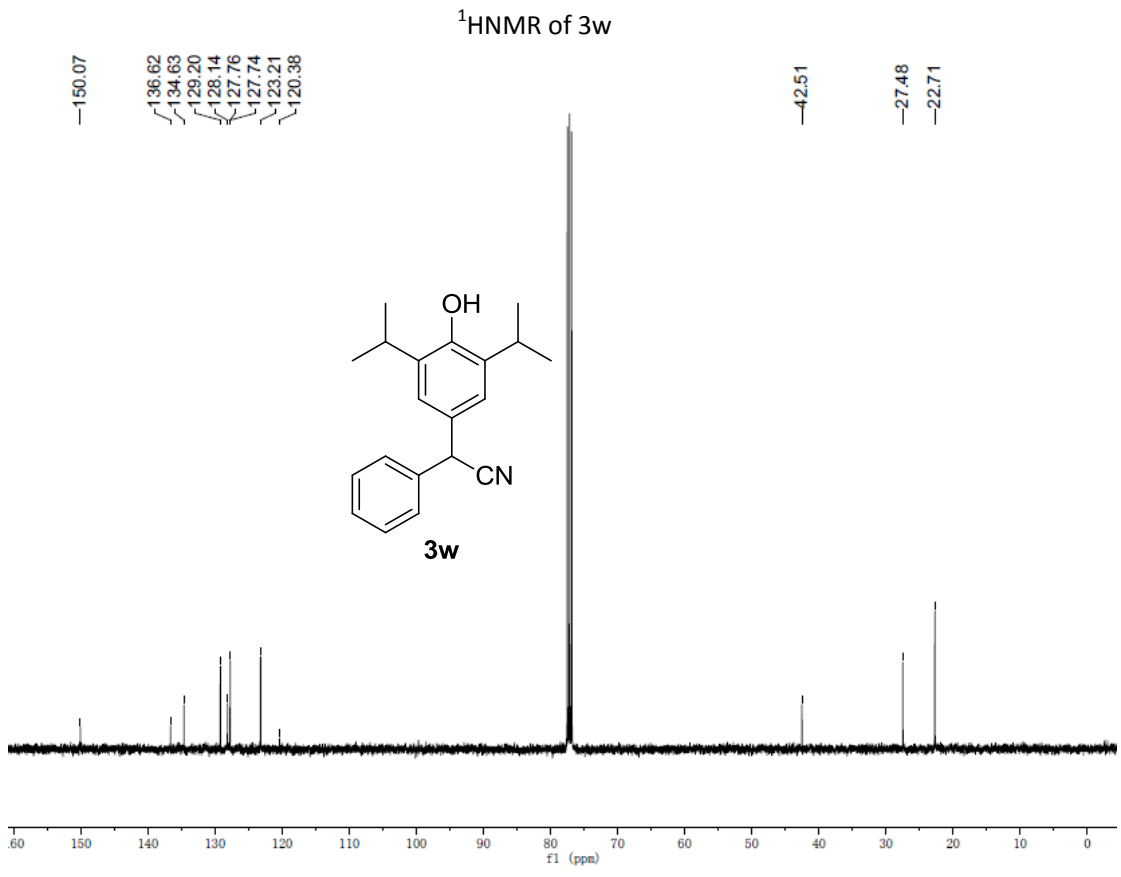

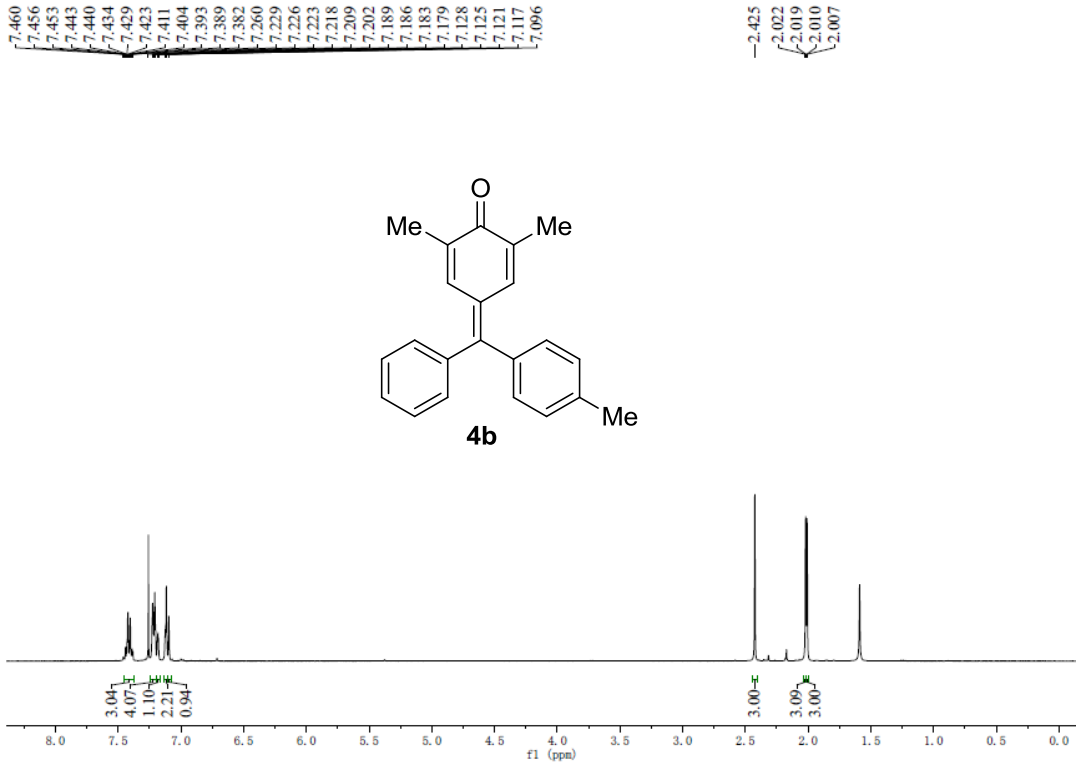

<sup>1</sup>H NMR of 4b

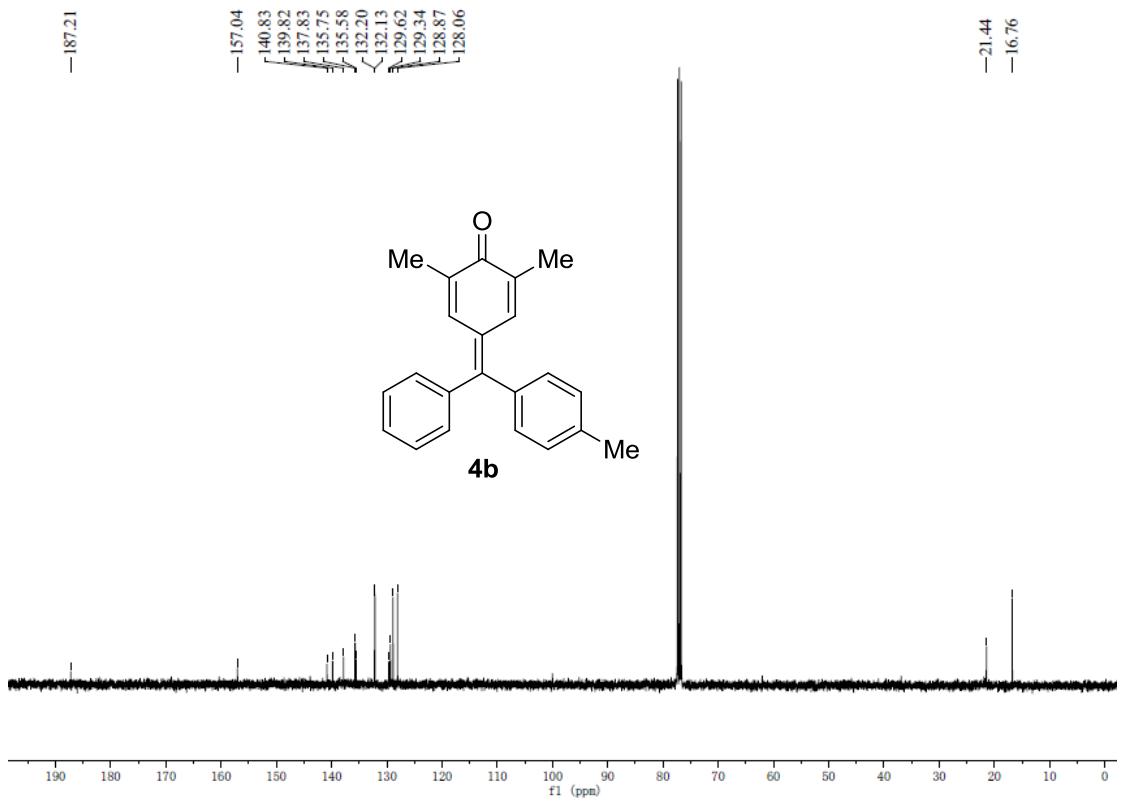

<sup>13</sup>C NMR of 4b

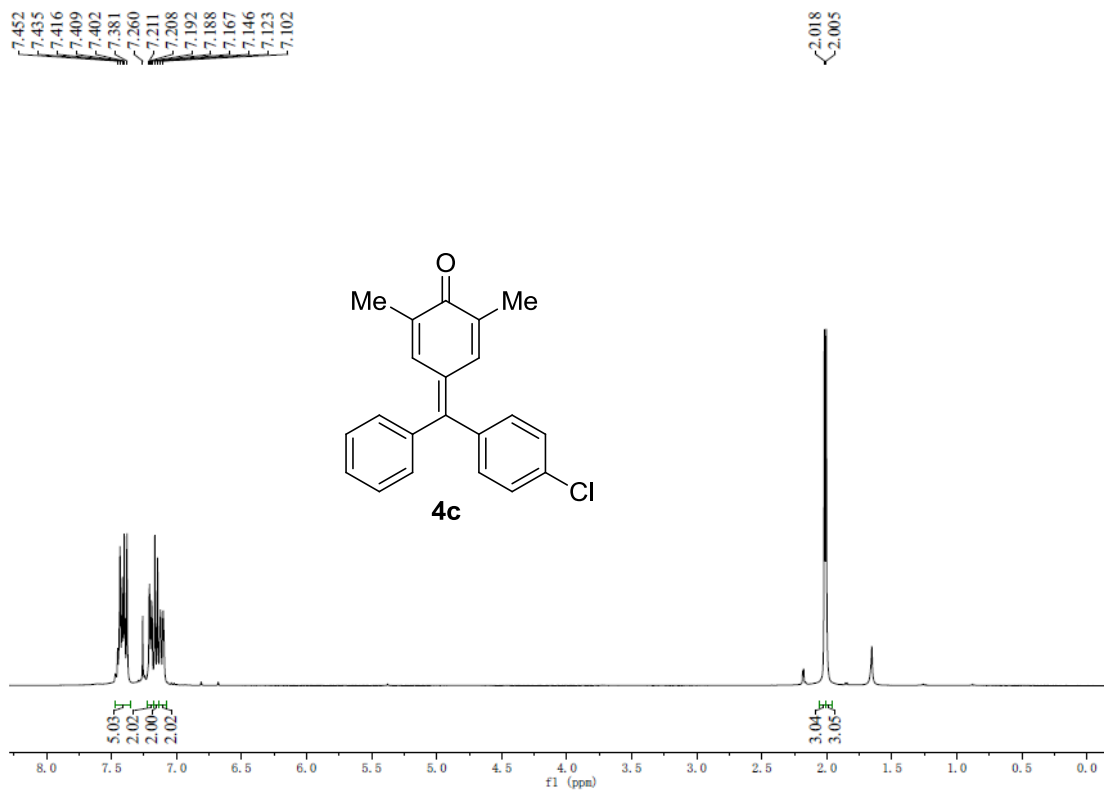

<sup>1</sup>H NMR of 4c

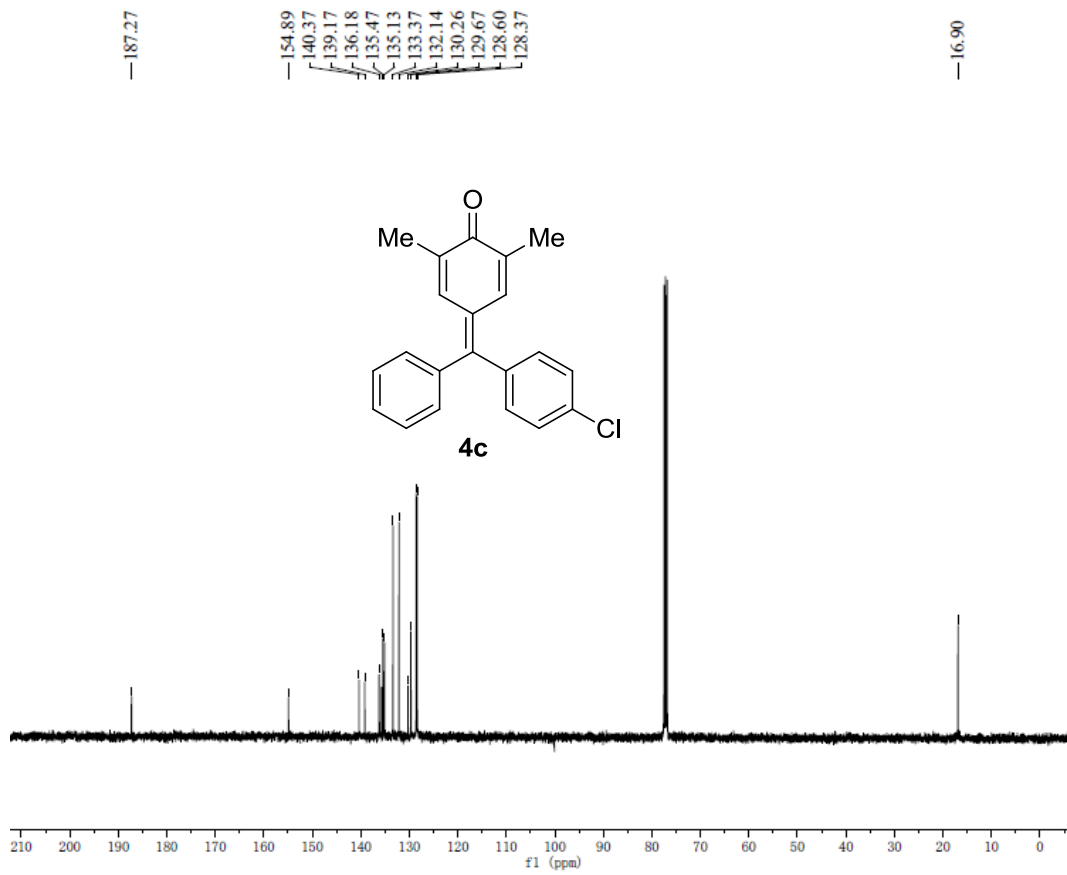

<sup>13</sup>C NMR of 4c

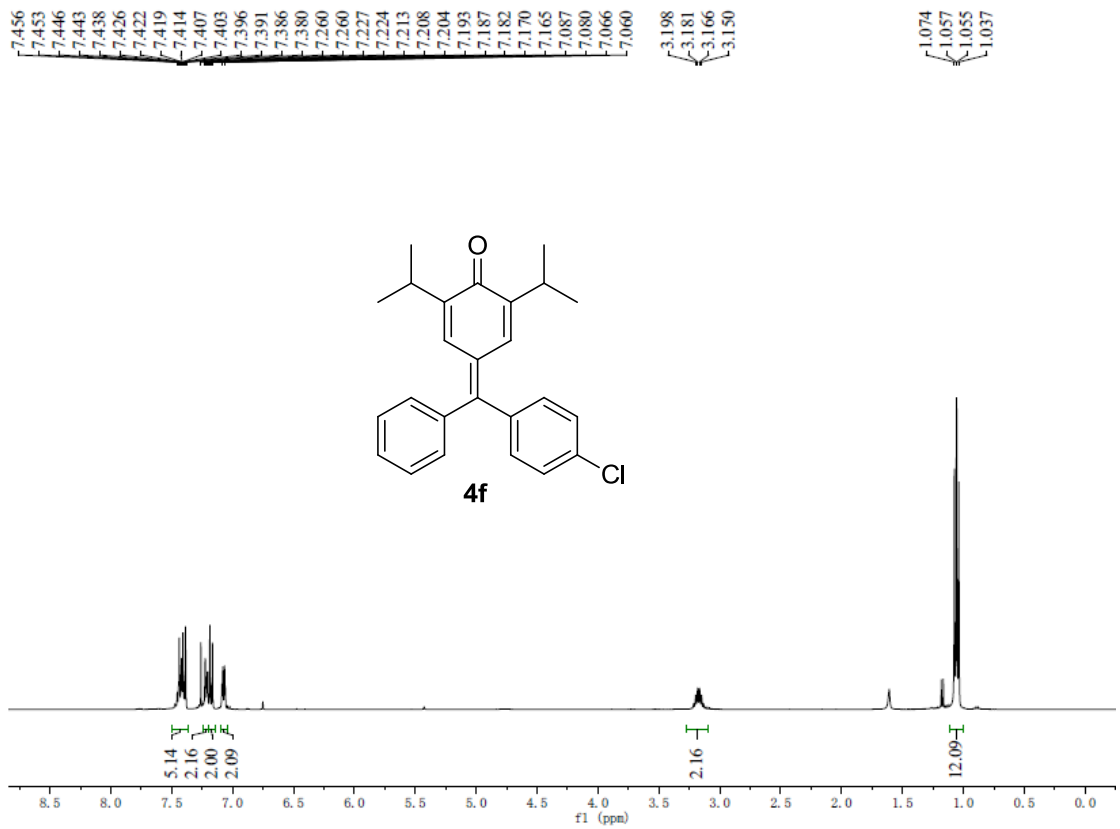

<sup>1</sup>H NMR of 4f

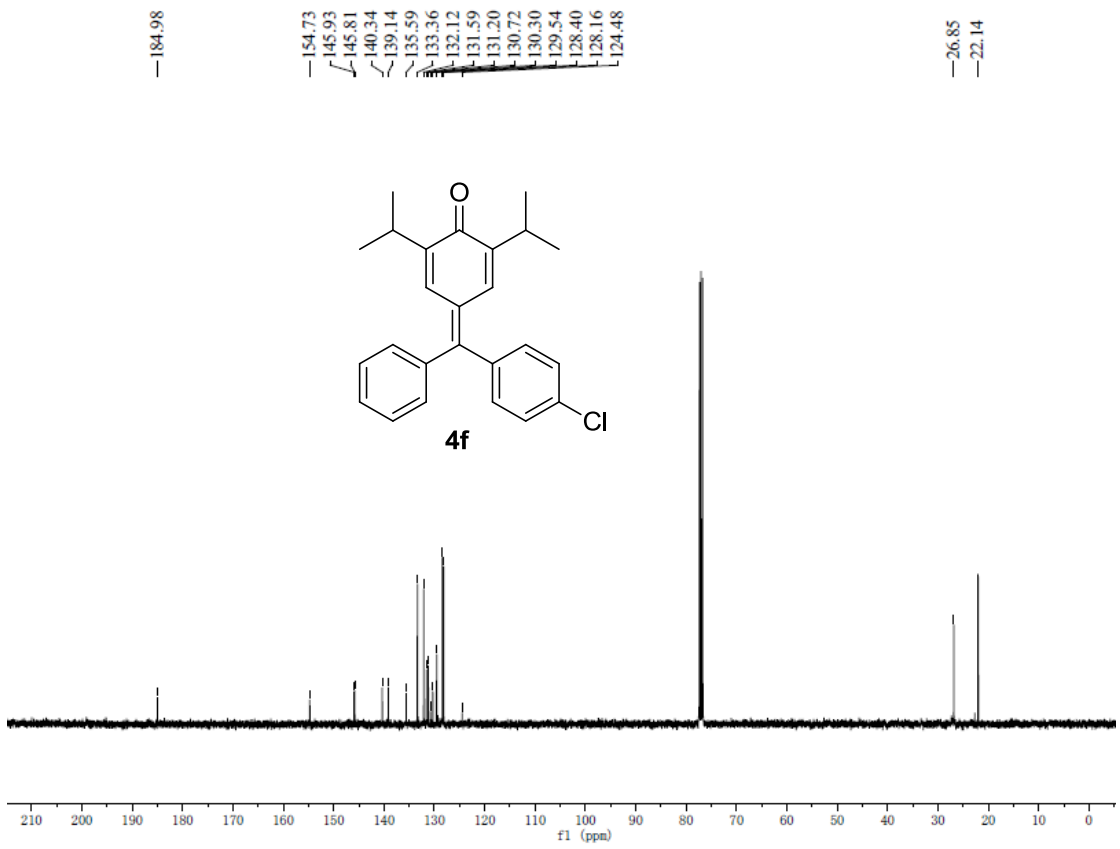

<sup>13</sup>C NMR of 4f

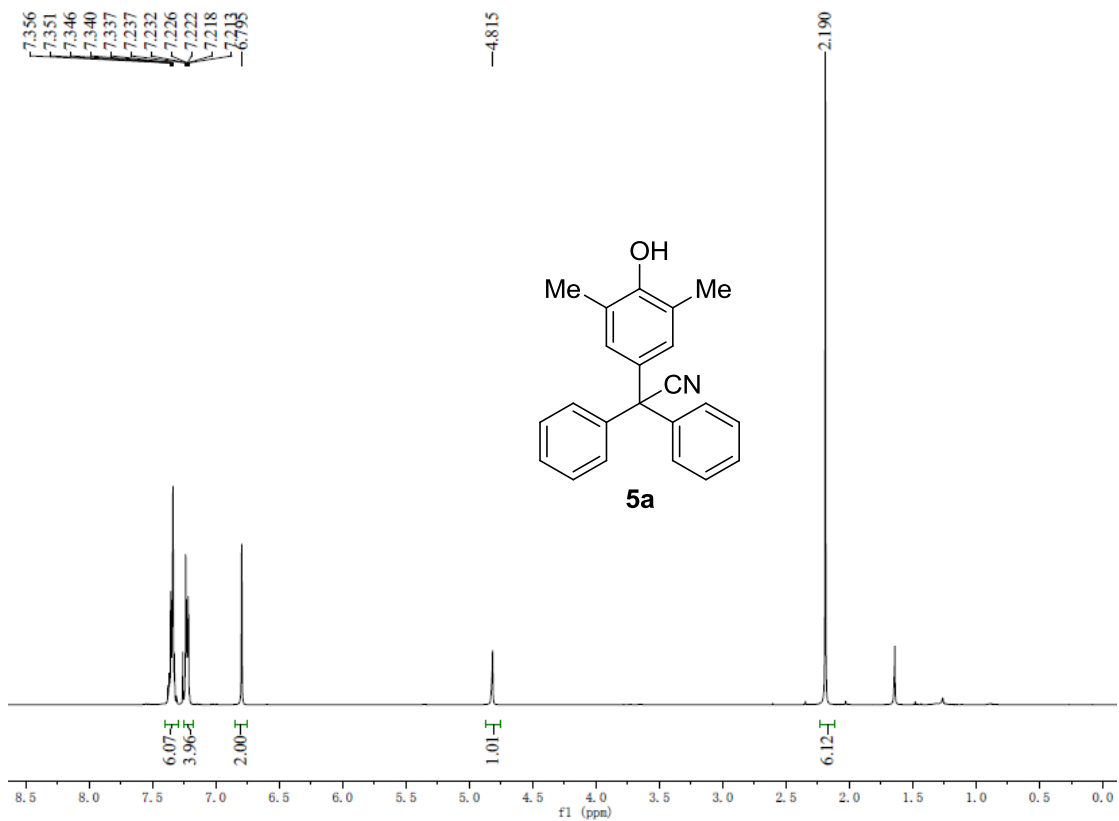

<sup>1</sup>H NMR of 5a

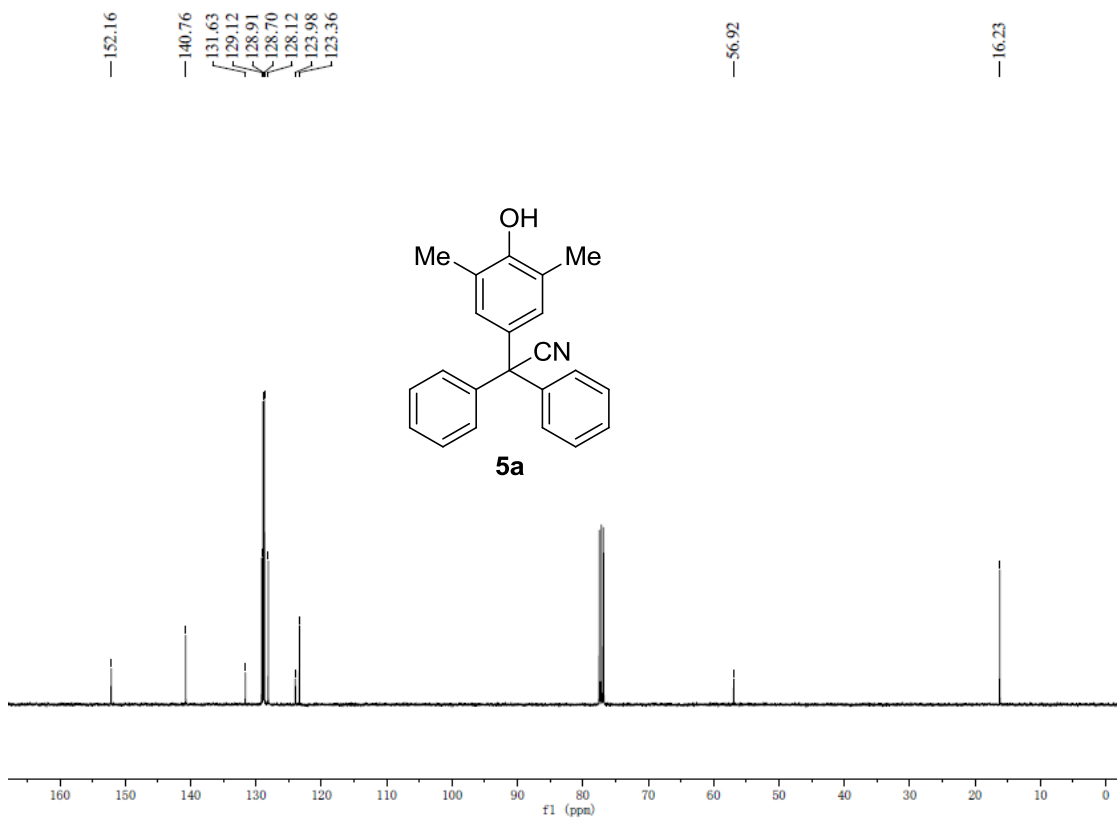

<sup>13</sup>C NMR of 5a

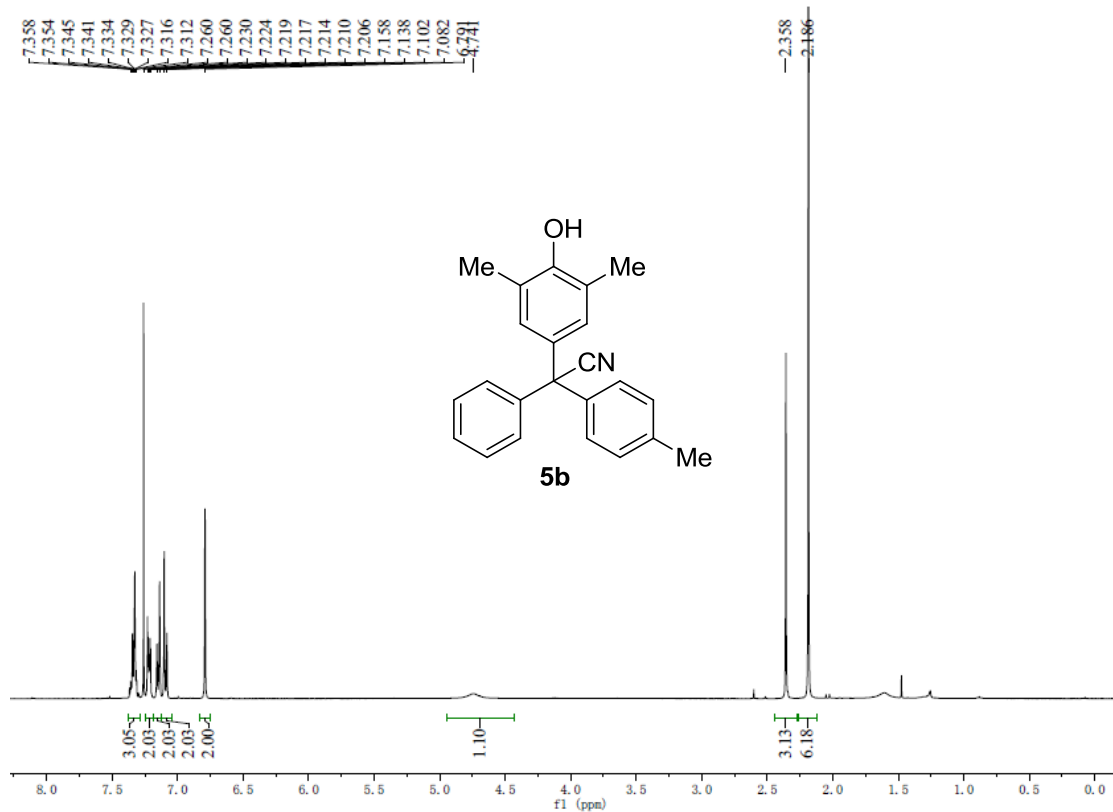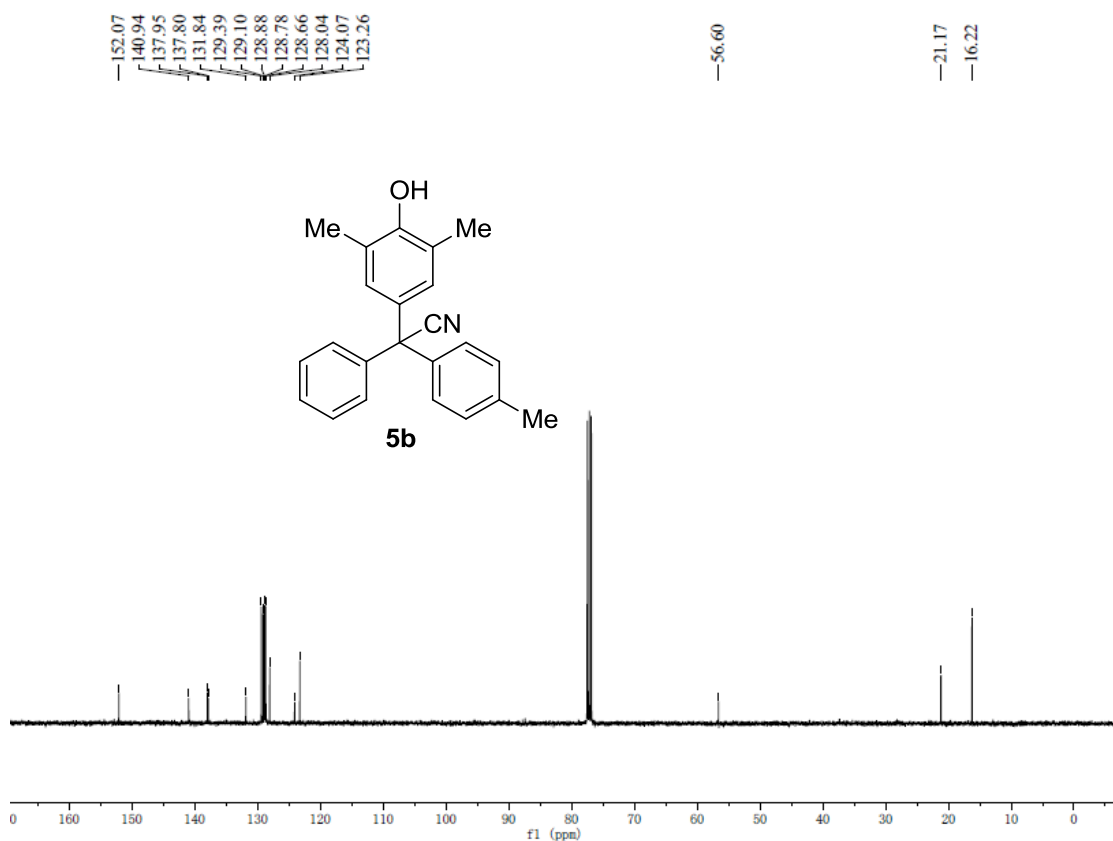



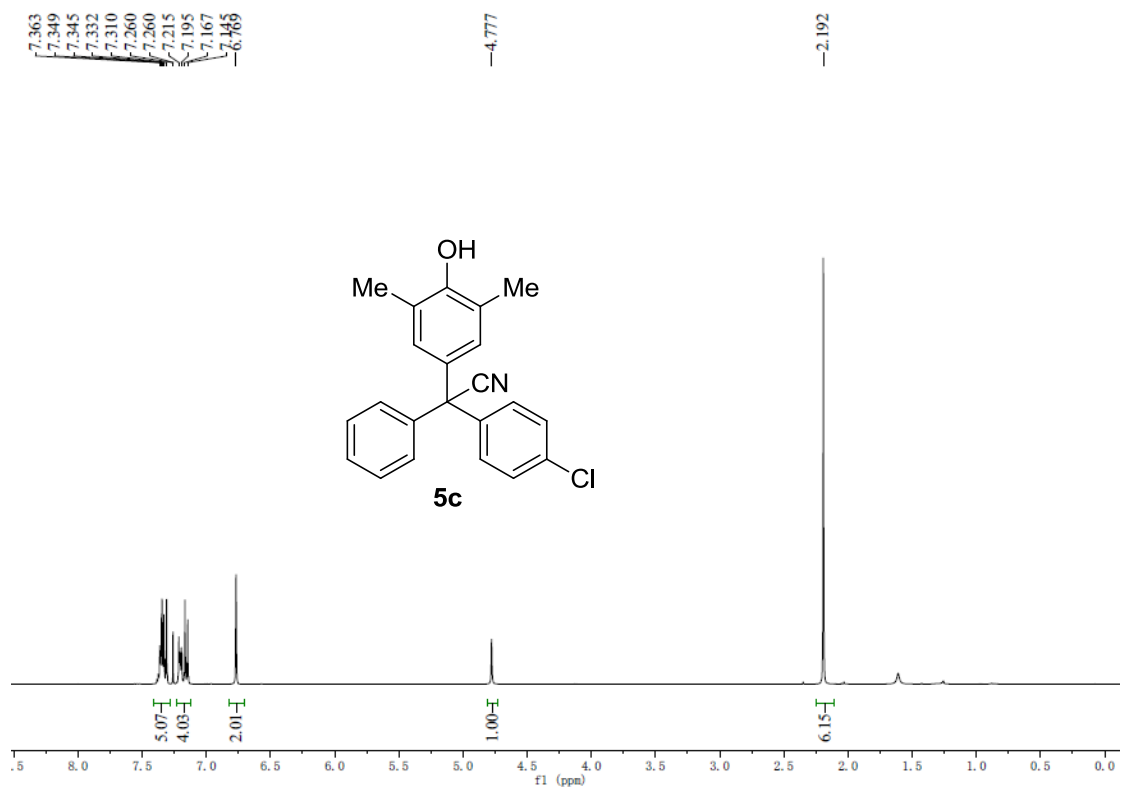

<sup>1</sup>H NMR of 5c

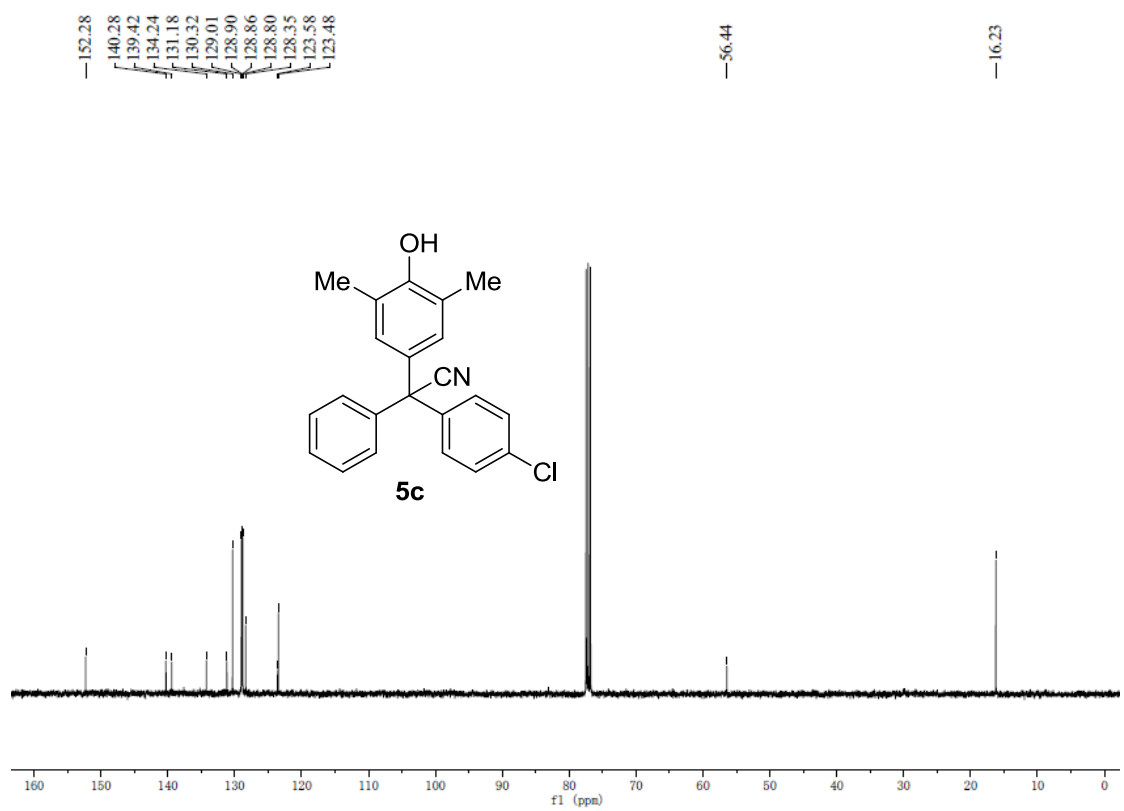

<sup>13</sup>C NMR of 5c

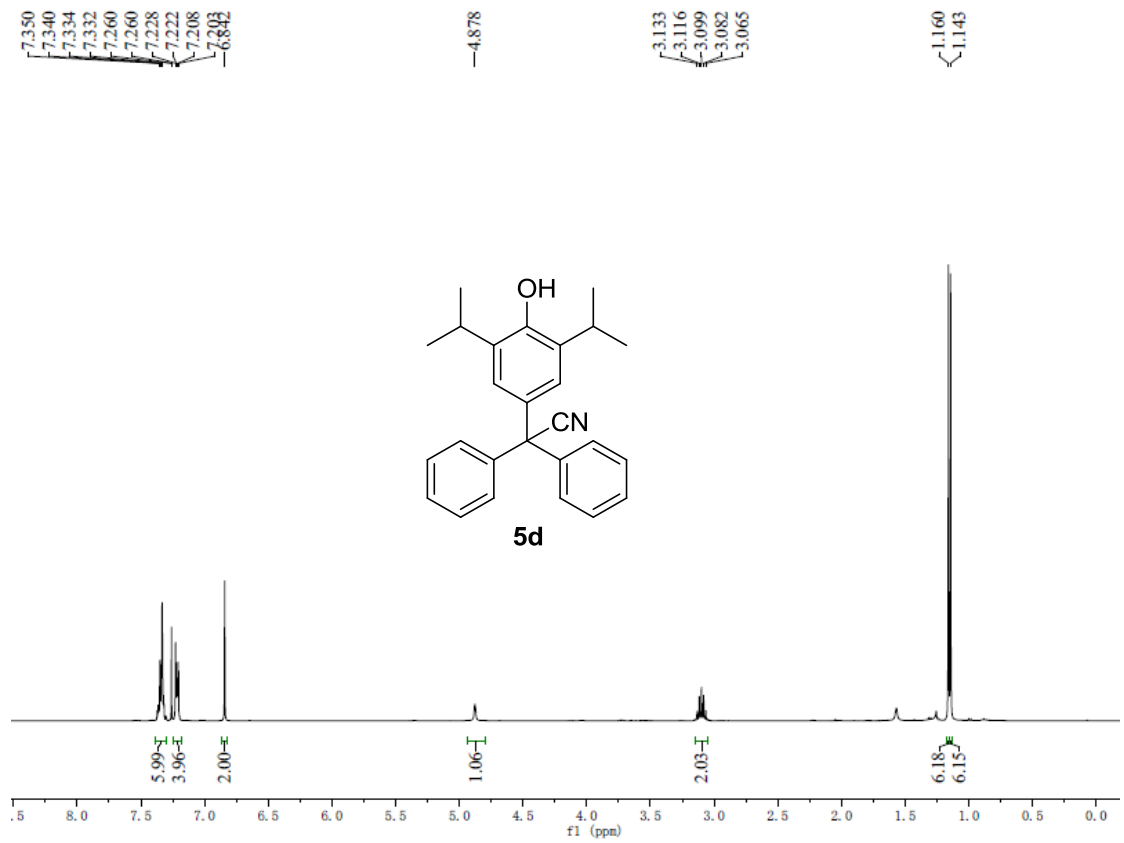

<sup>1</sup>H NMR of 5d

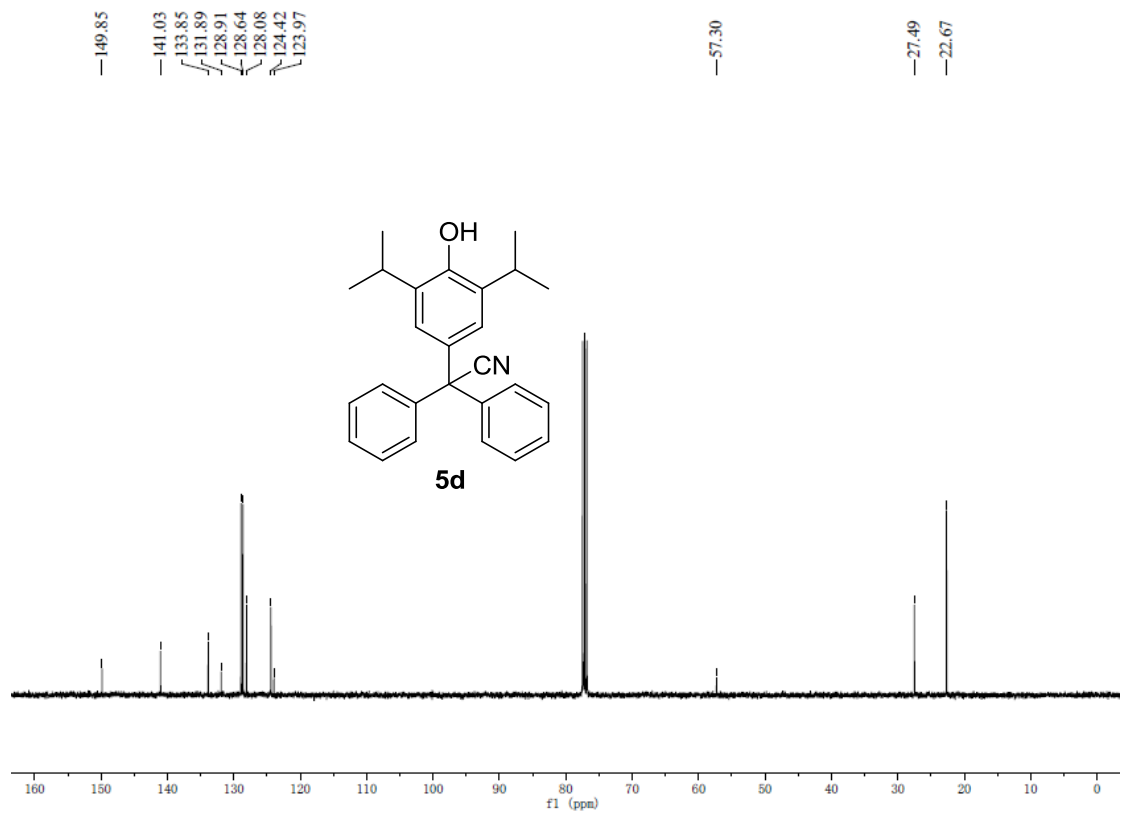

<sup>13</sup>C NMR of 5d

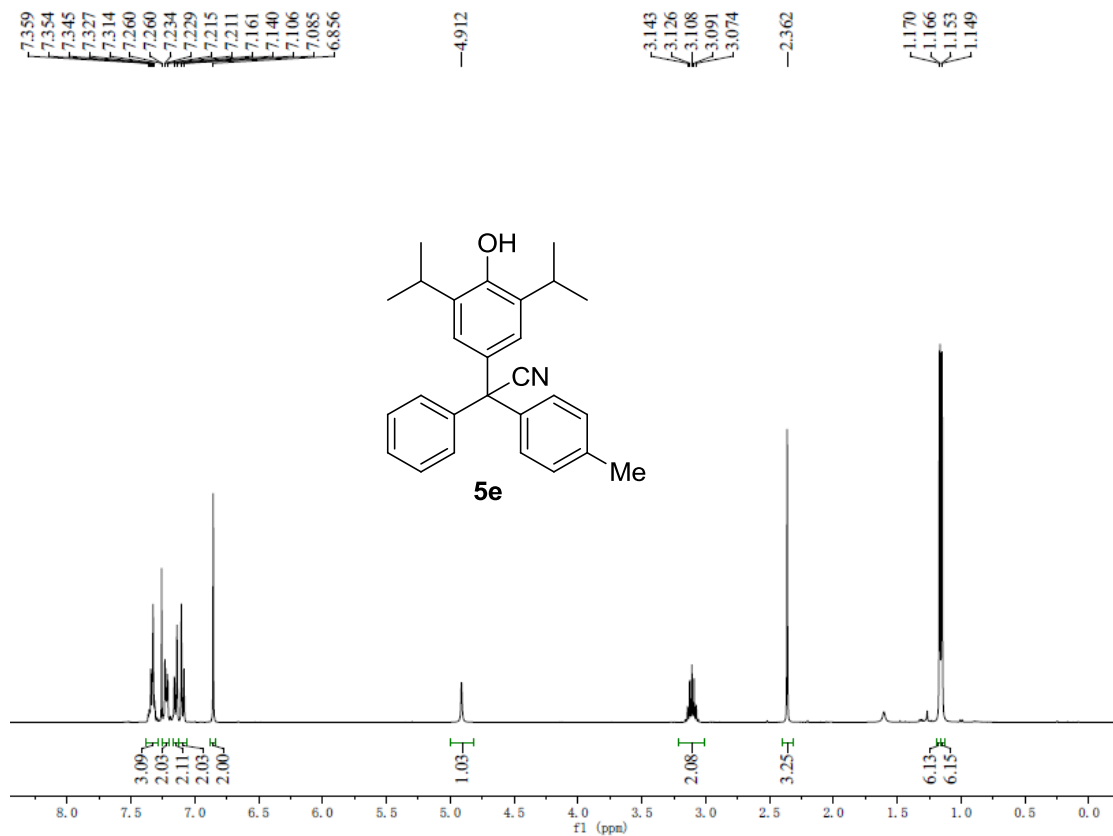

<sup>1</sup>H NMR of **5e**

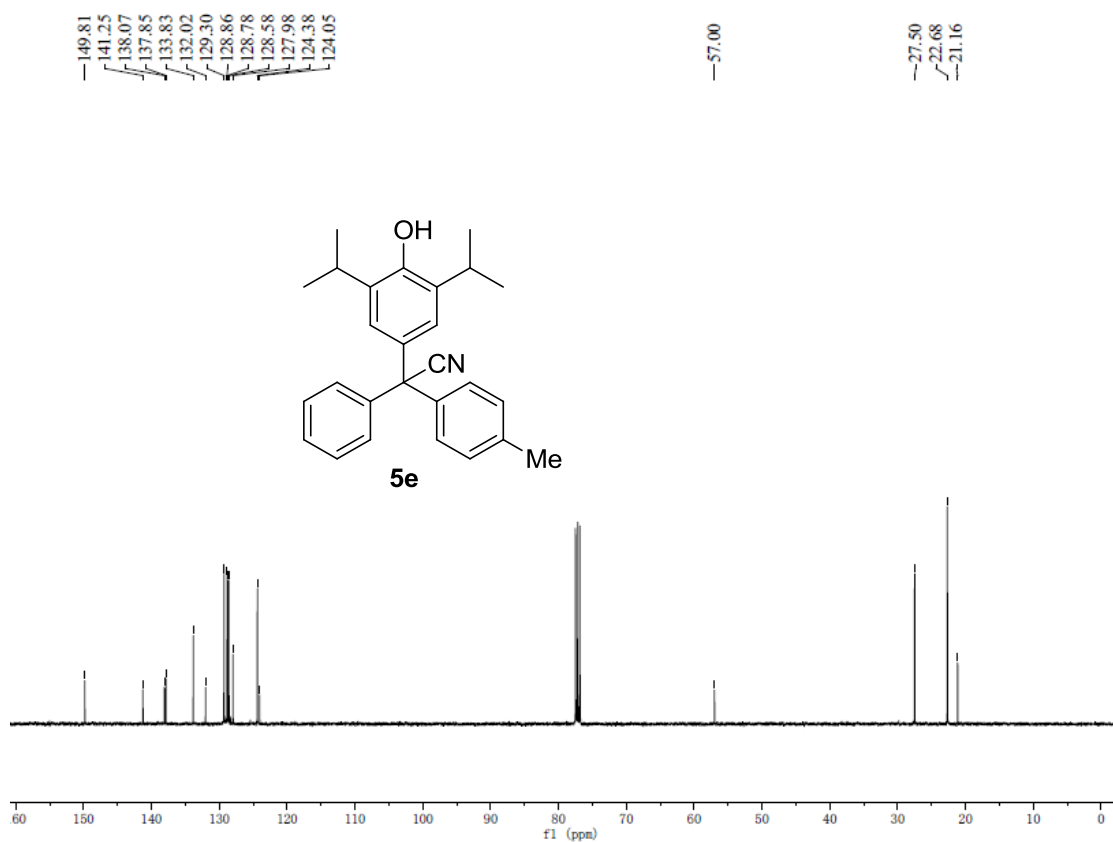

<sup>13</sup>C NMR of **5e**

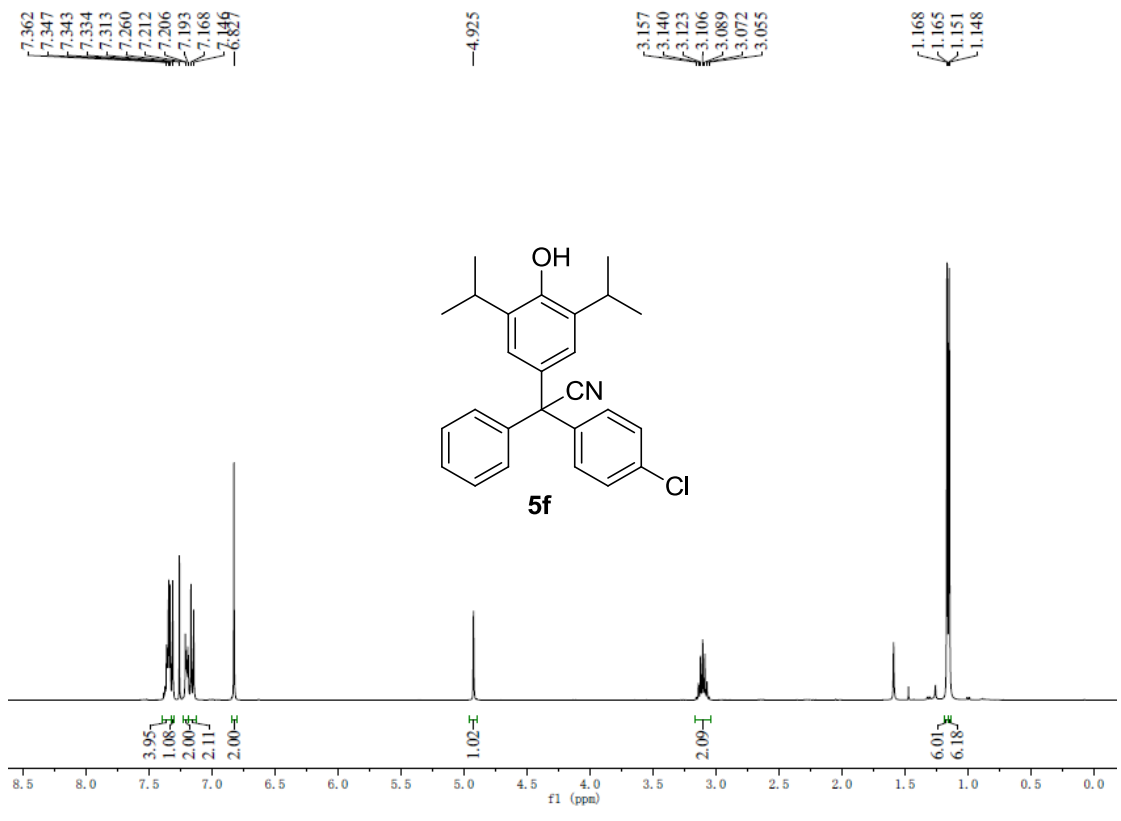

<sup>1</sup>H NMR of 5f

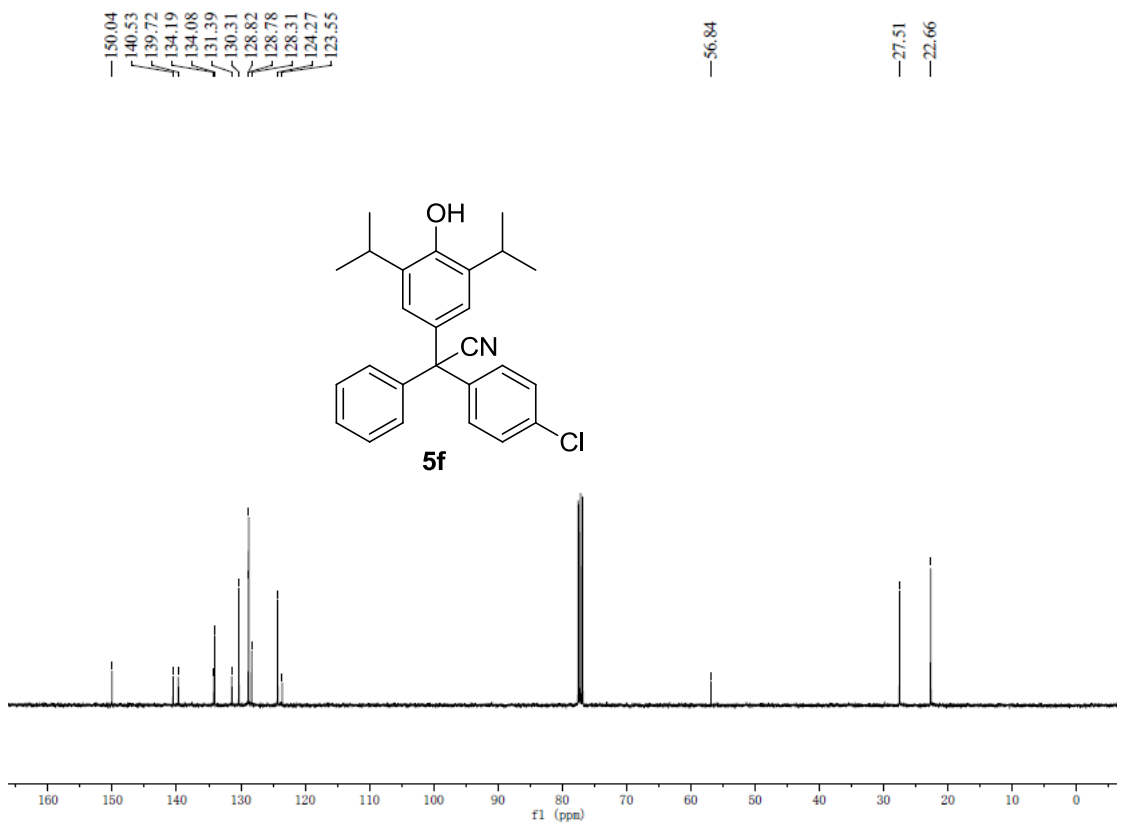

<sup>13</sup>C NMR of 5f

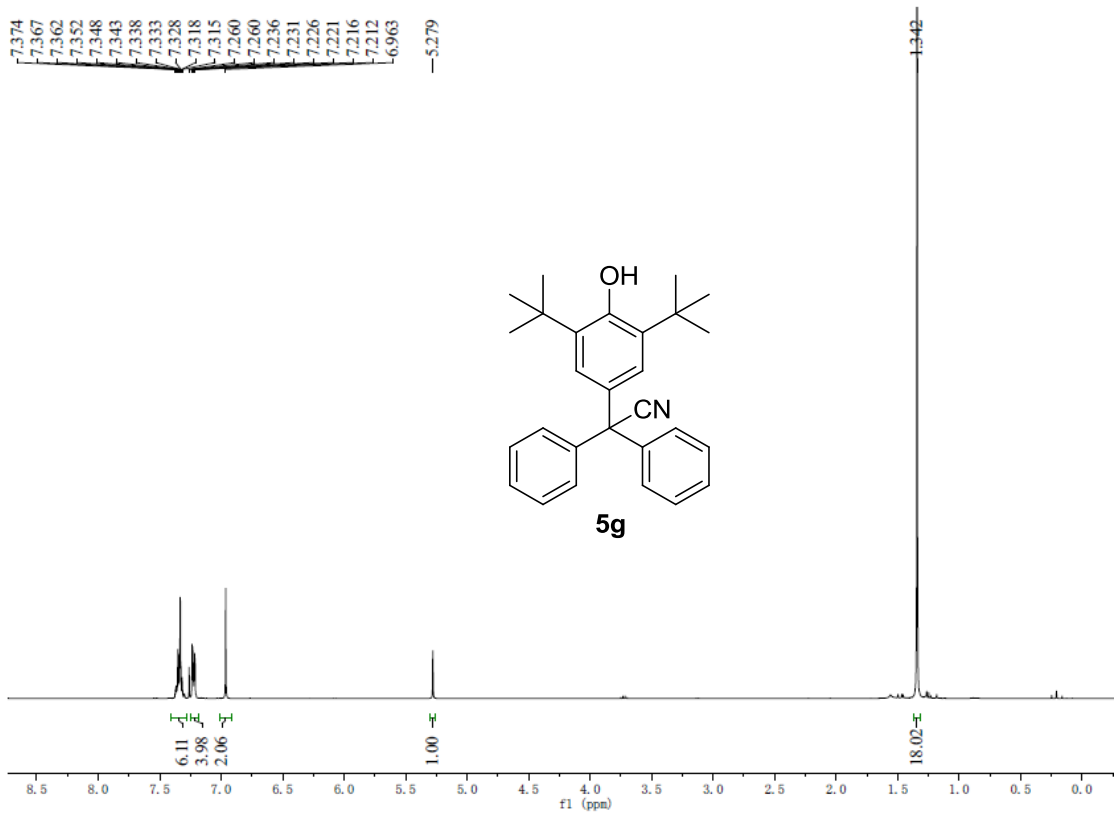

<sup>1</sup>H NMR of 5g

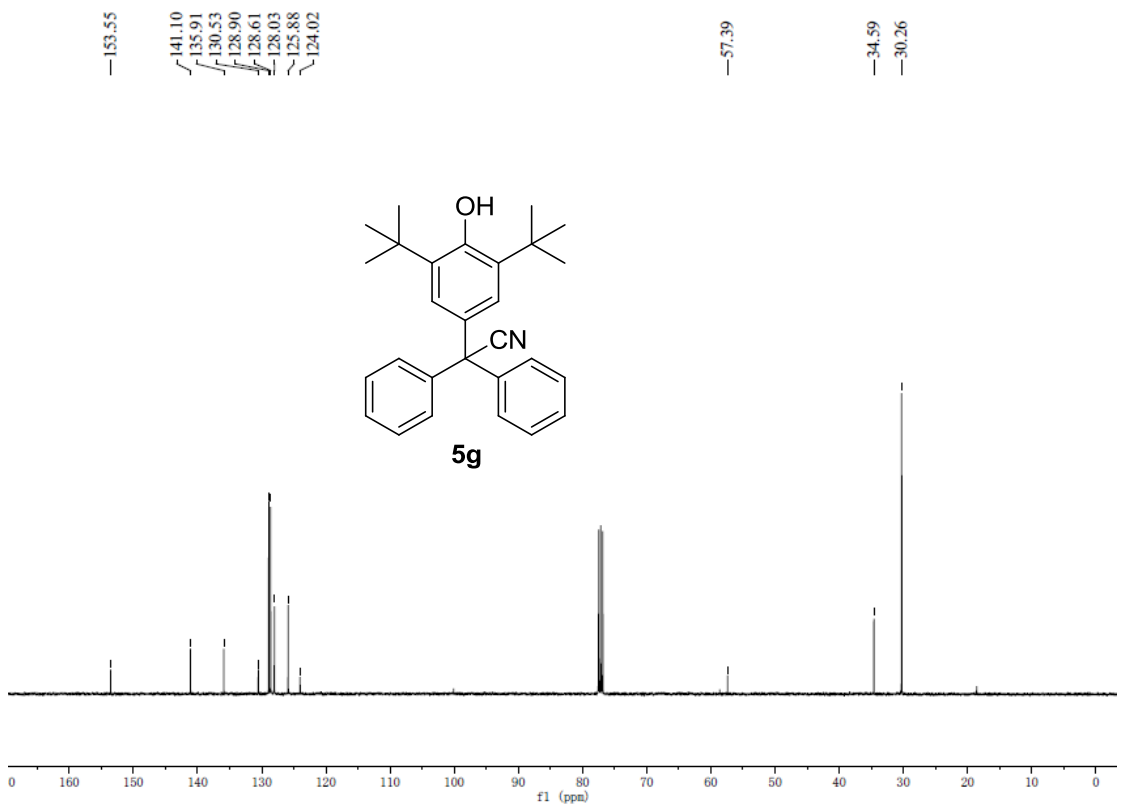

<sup>13</sup>C NMR of 5g

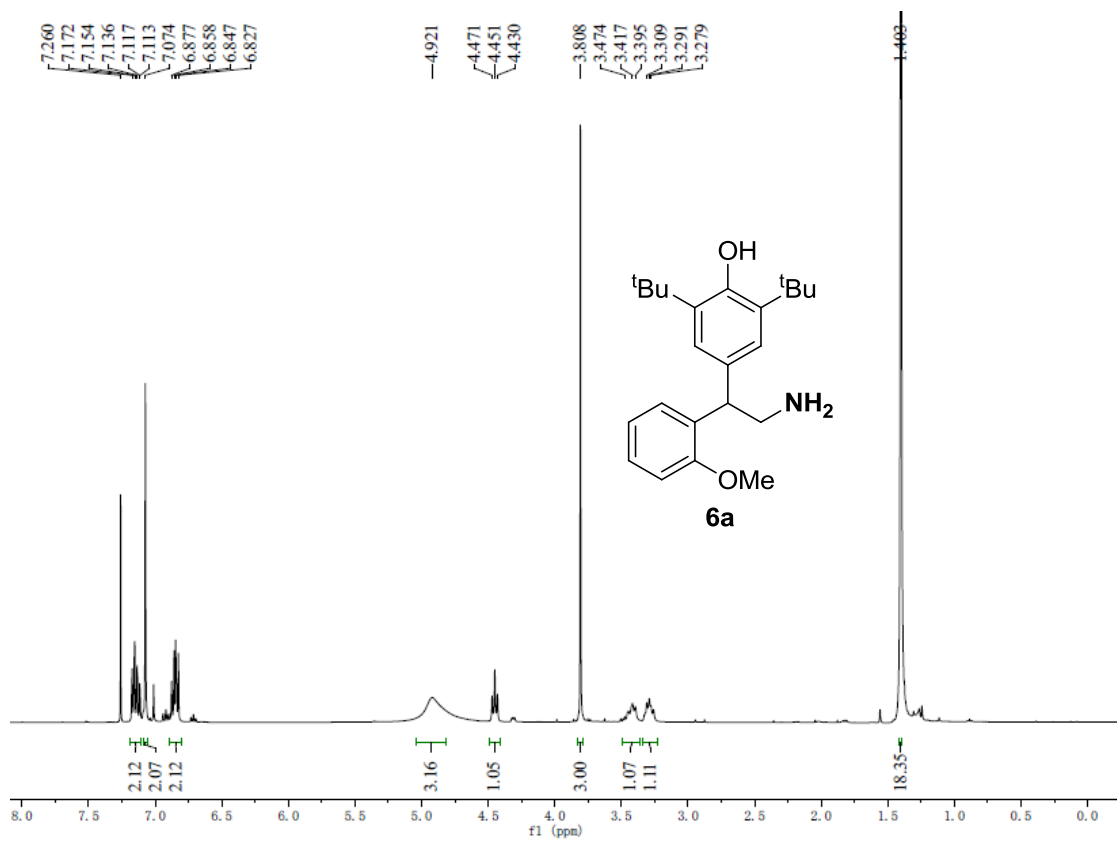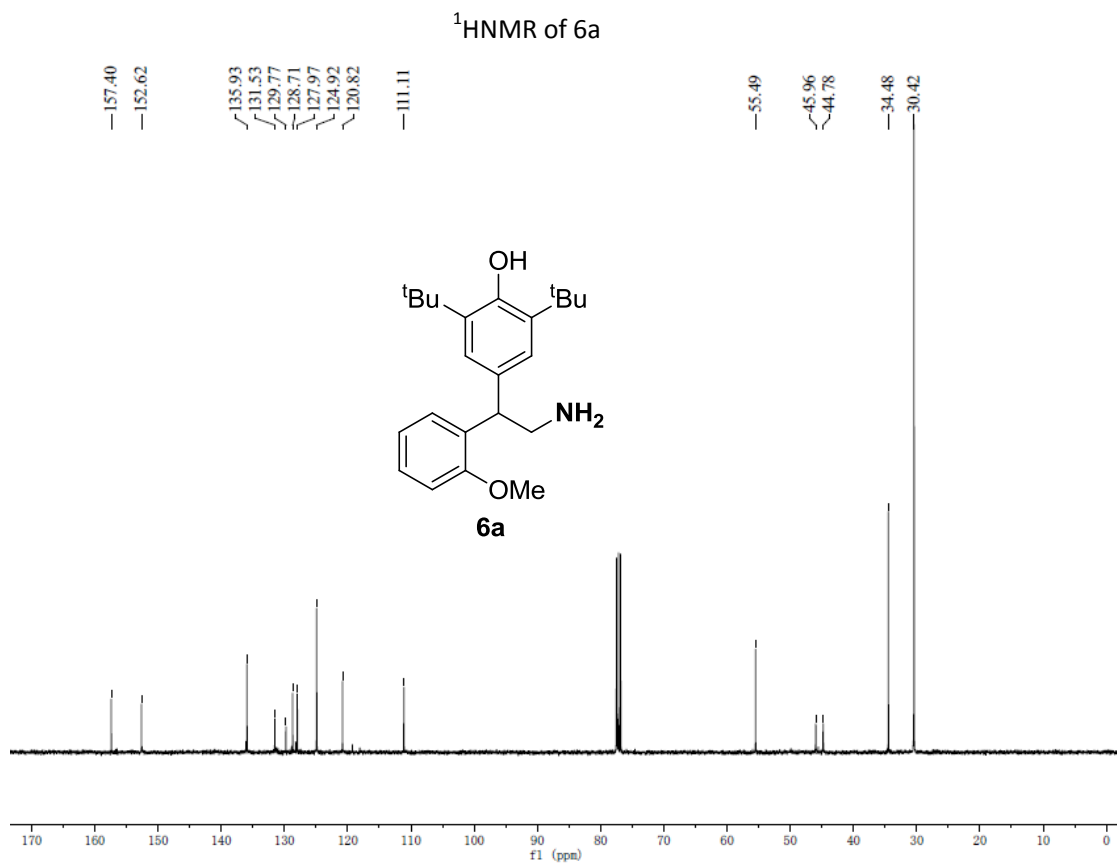

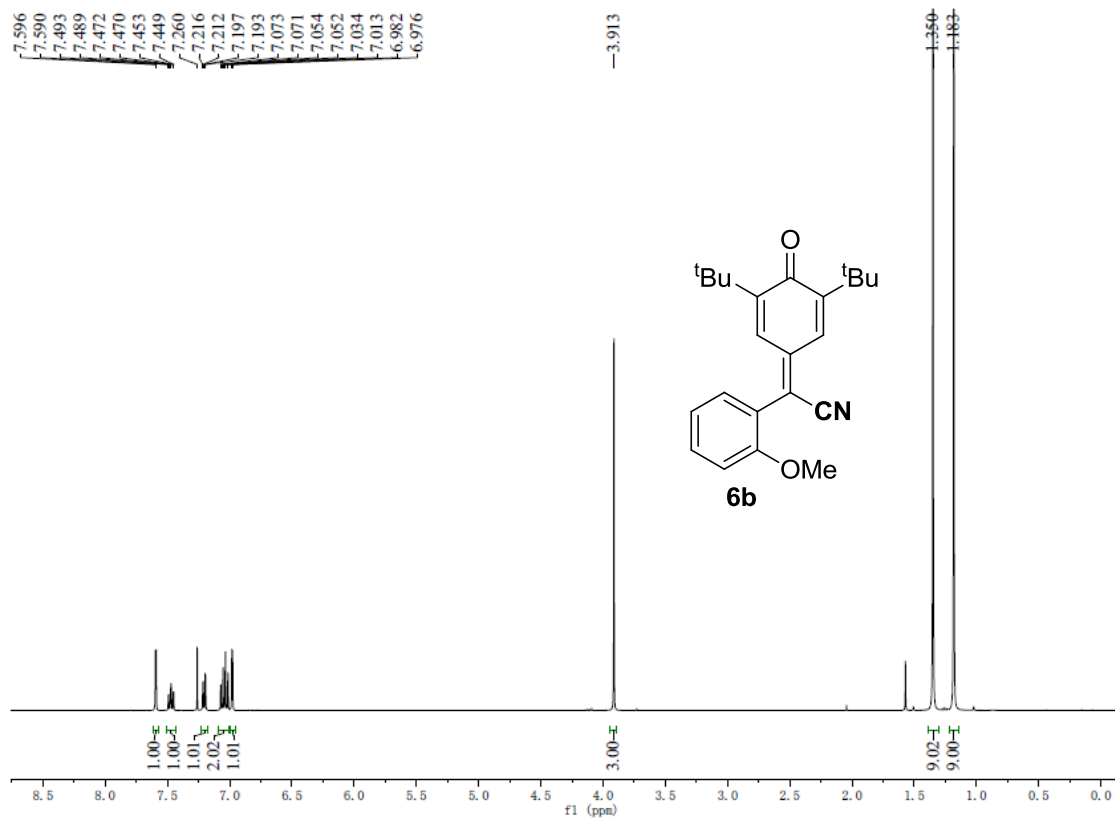

<sup>1</sup>H NMR of 6b

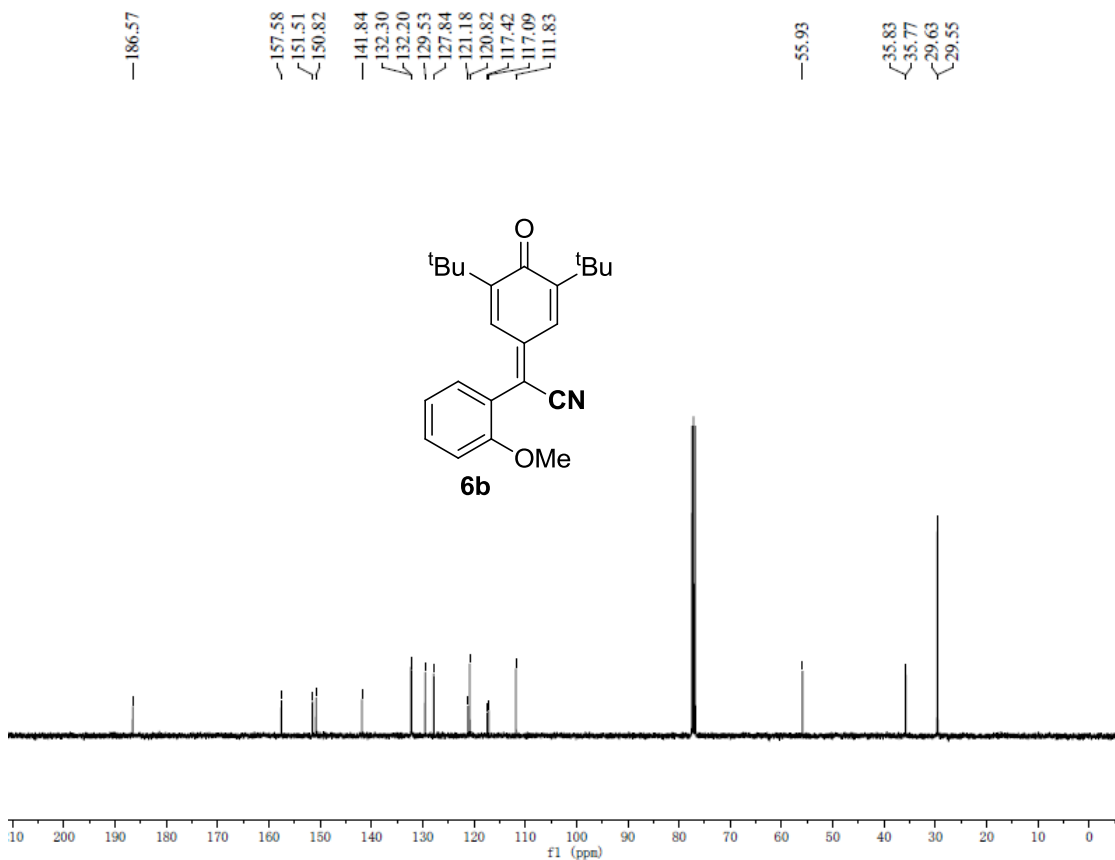

<sup>13</sup>C NMR of 6b

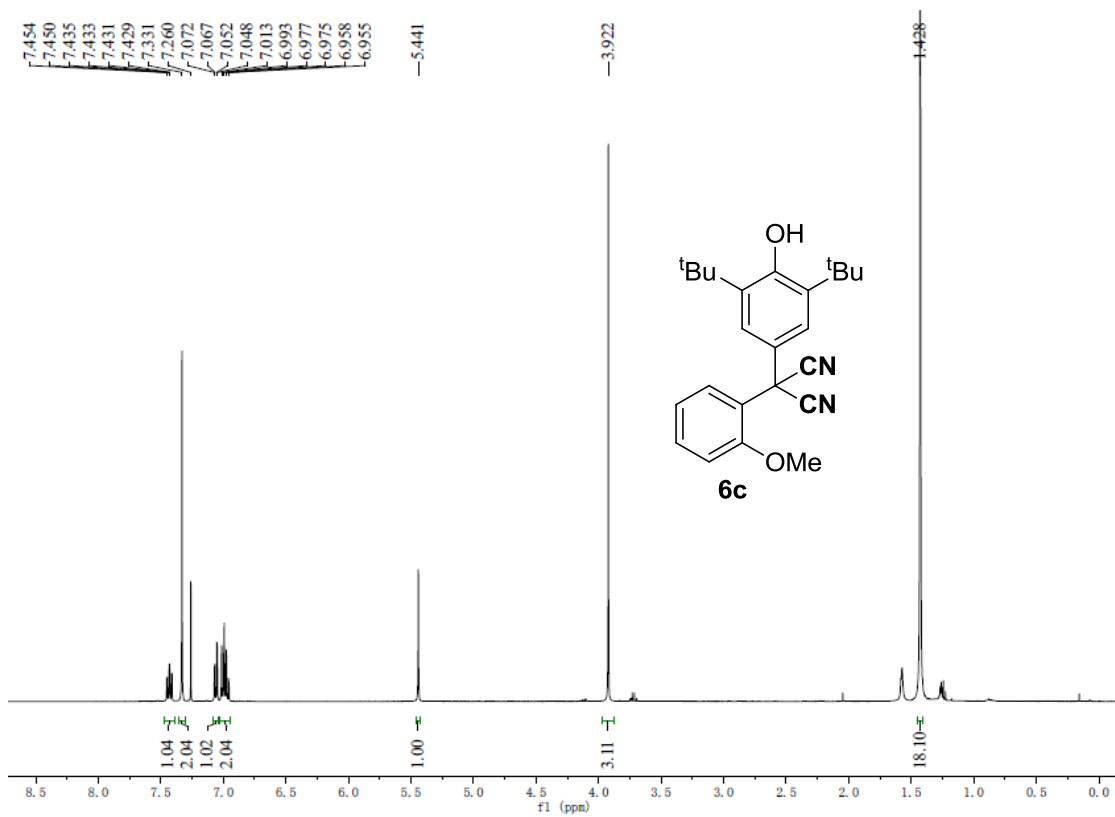

<sup>1</sup>H NMR of **6c**

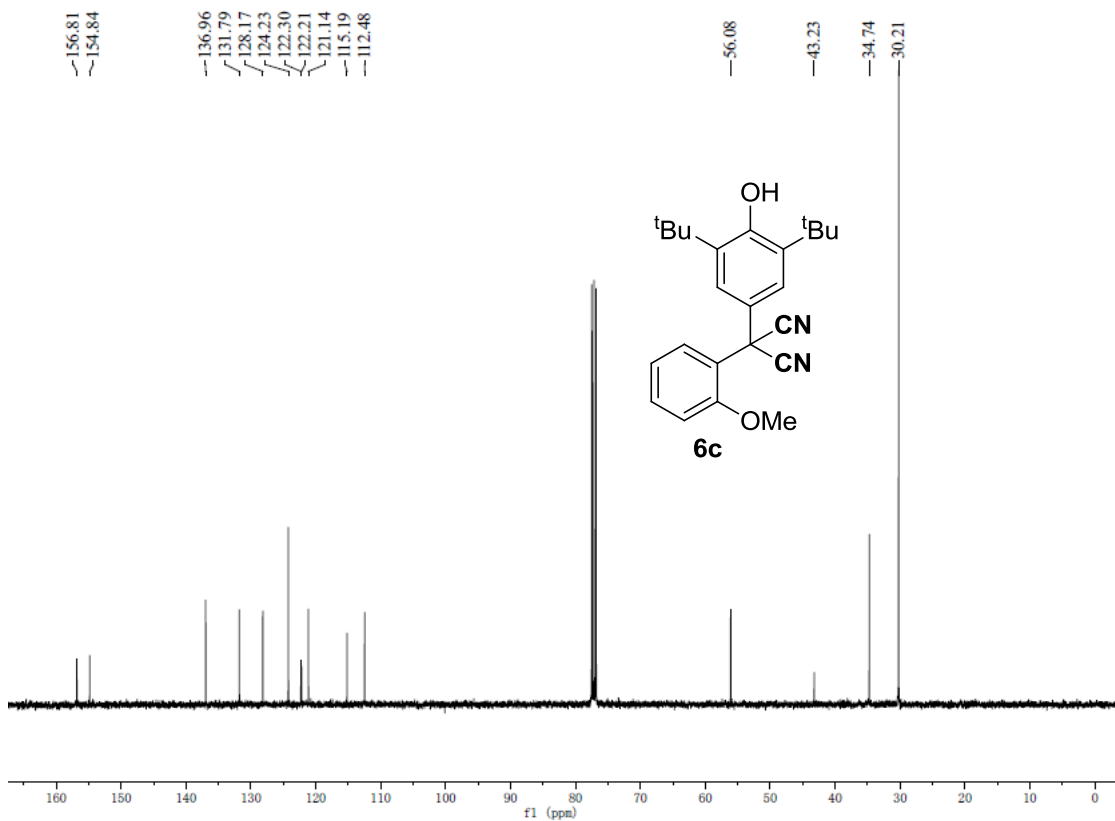

<sup>13</sup>C NMR of **6c**



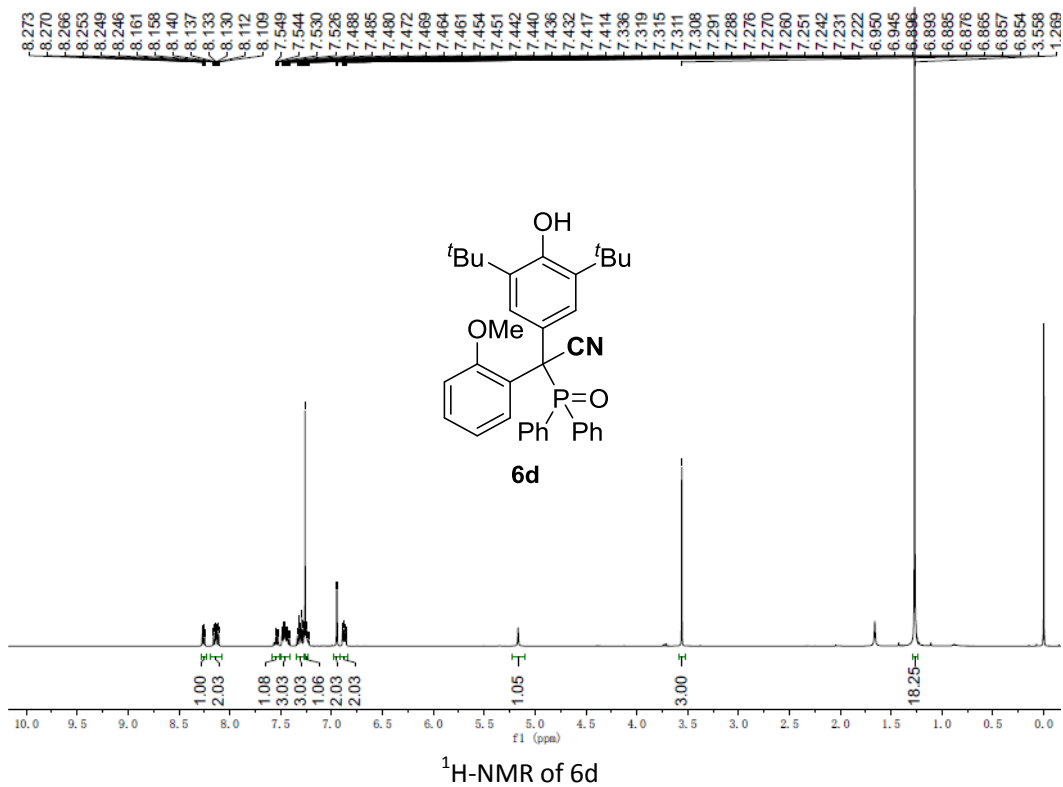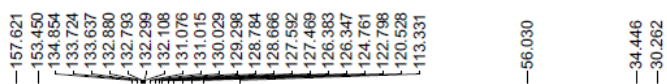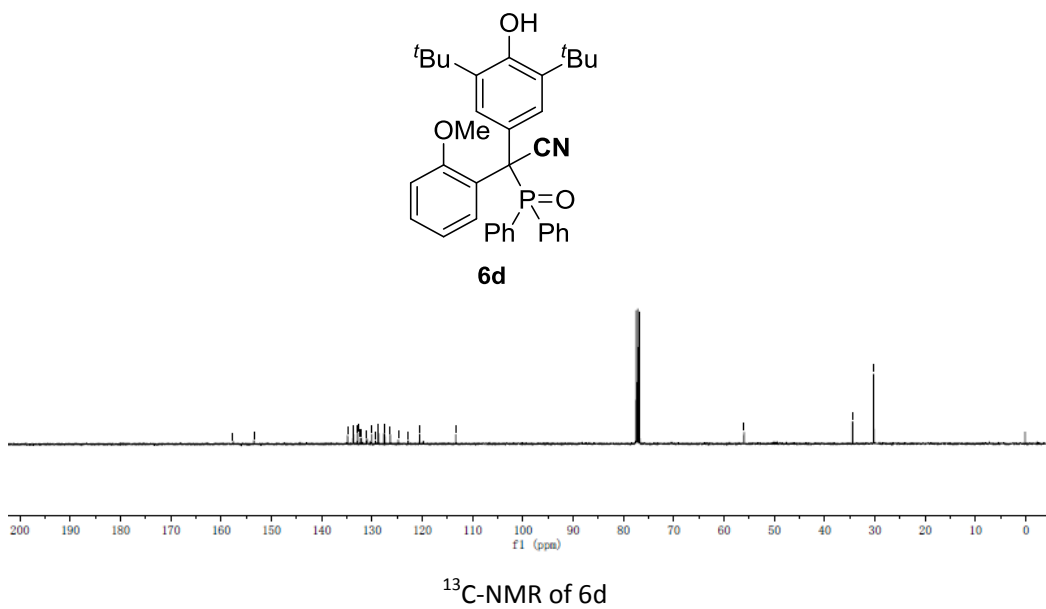

-32.758

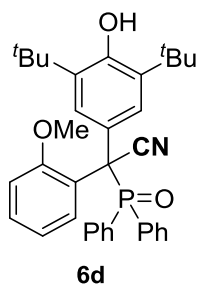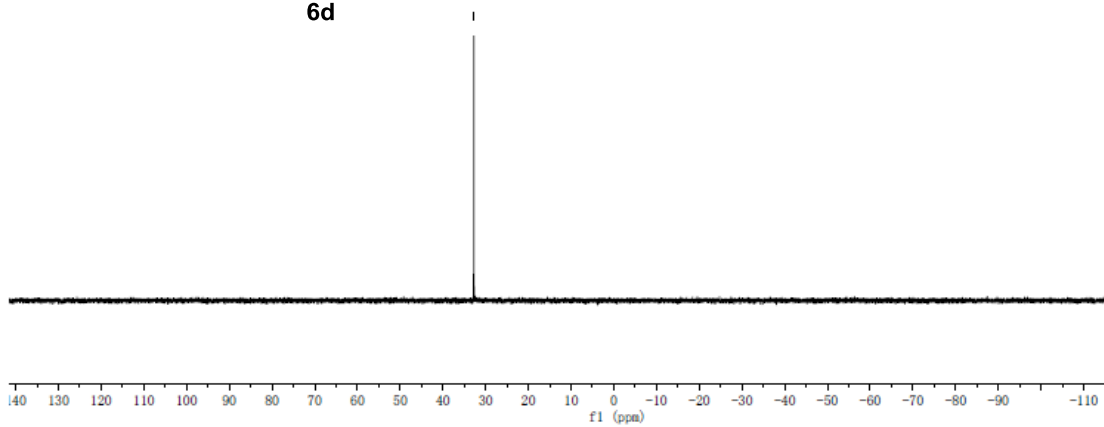

7.879  
7.875  
7.860  
7.856  
7.370  
7.368  
7.260  
7.175  
7.154  
7.059  
7.042  
7.040  
7.019  
6.999  
6.973  
6.926  
6.924  
6.906  
6.904

3.645  
2.297  
1.201

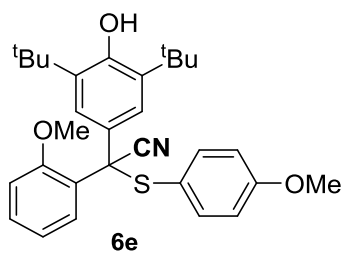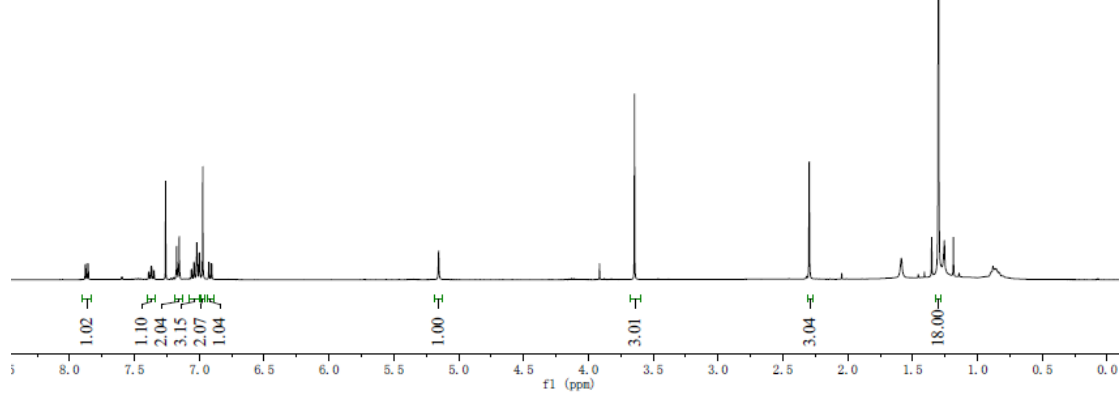

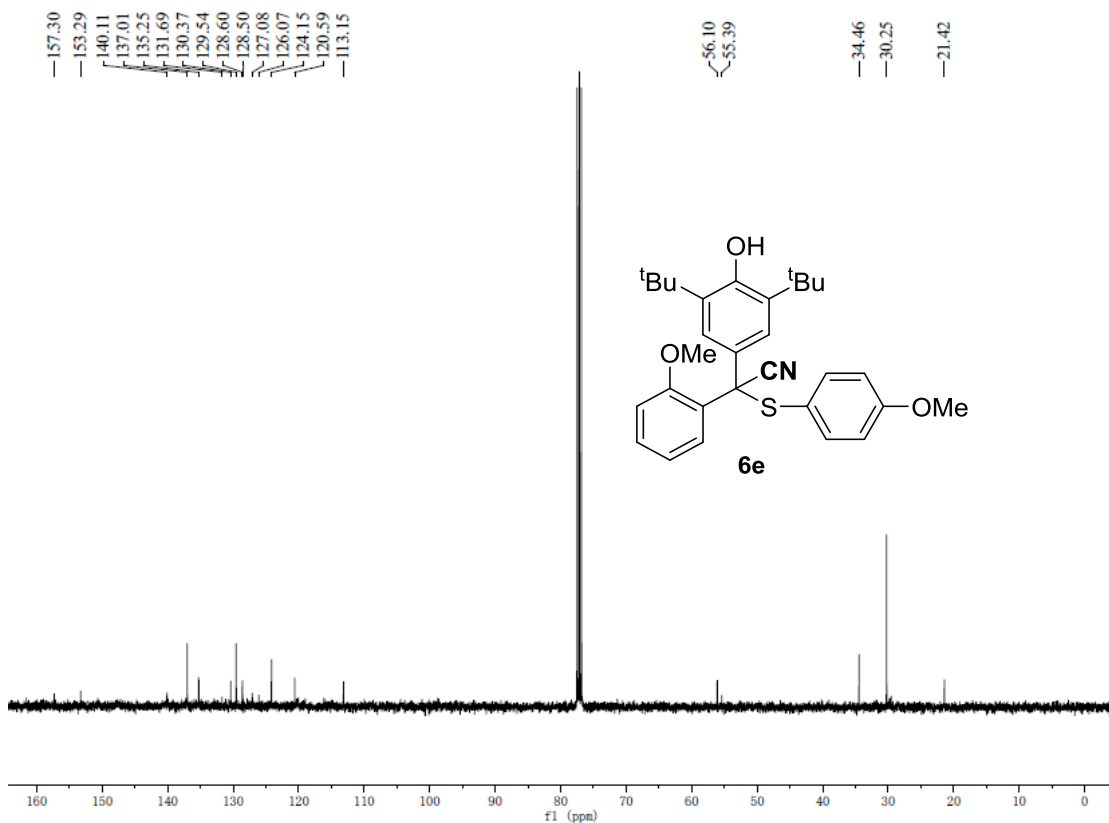

<sup>13</sup>CNMR of 6e

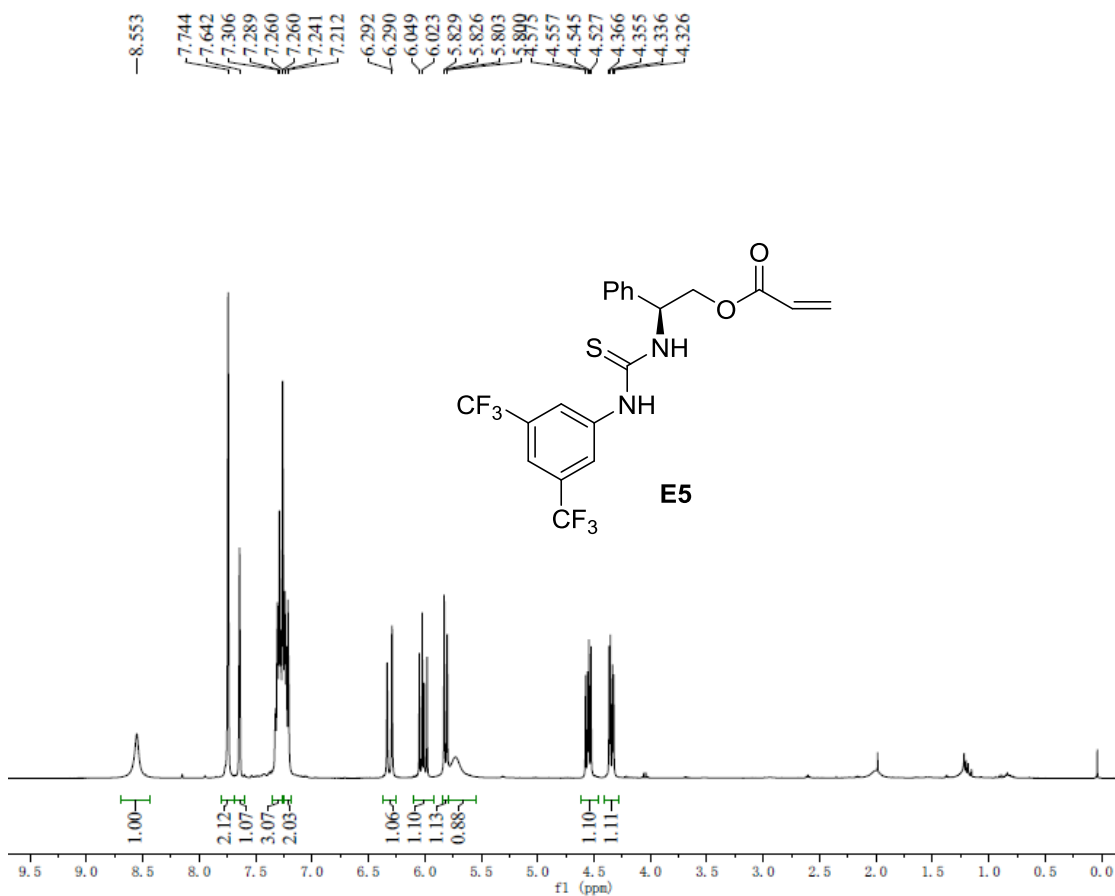

<sup>1</sup>HNMR of E5

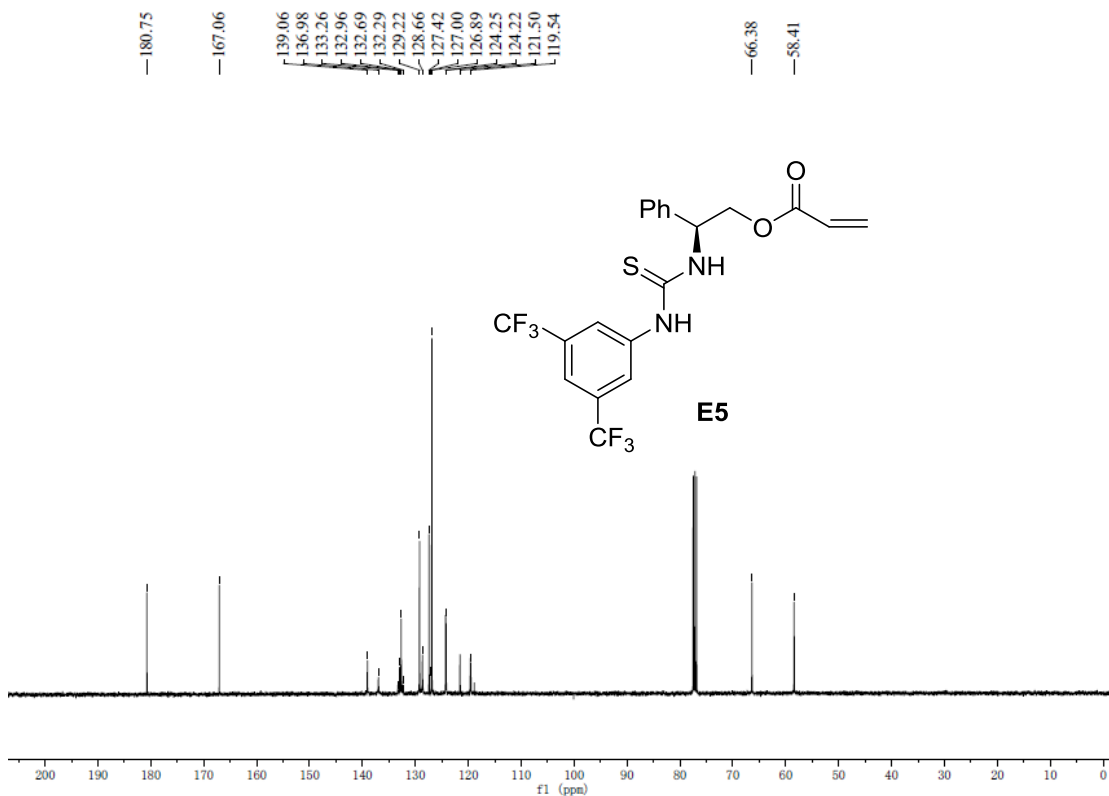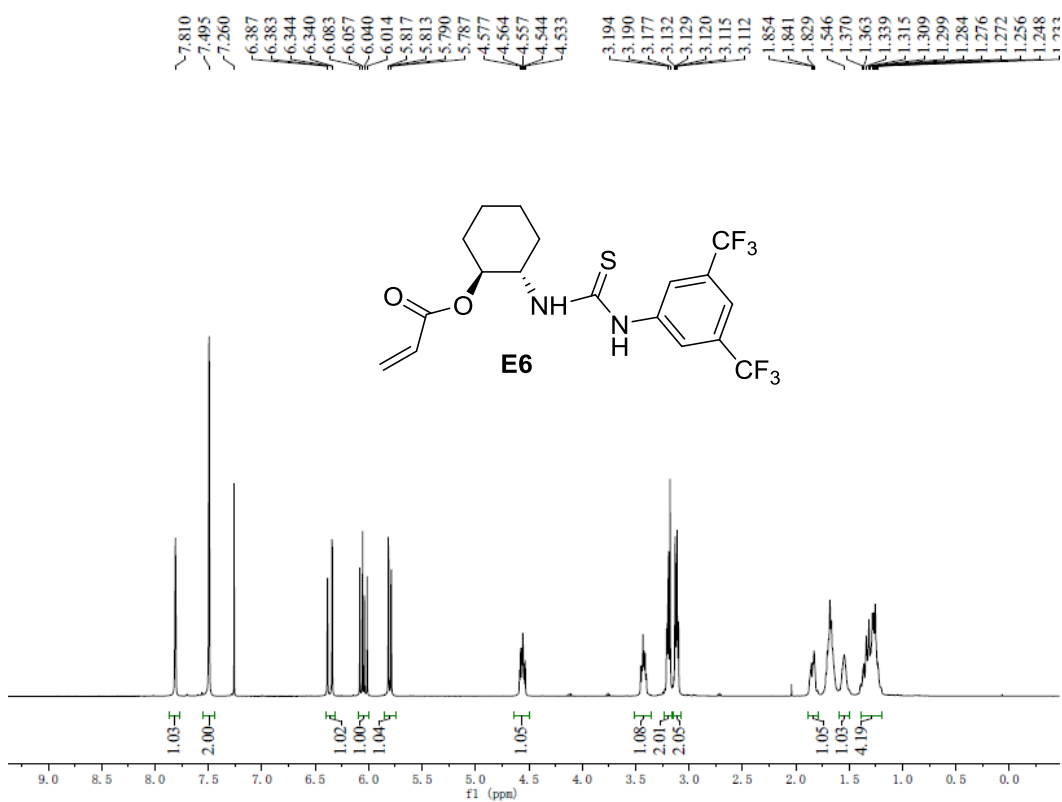

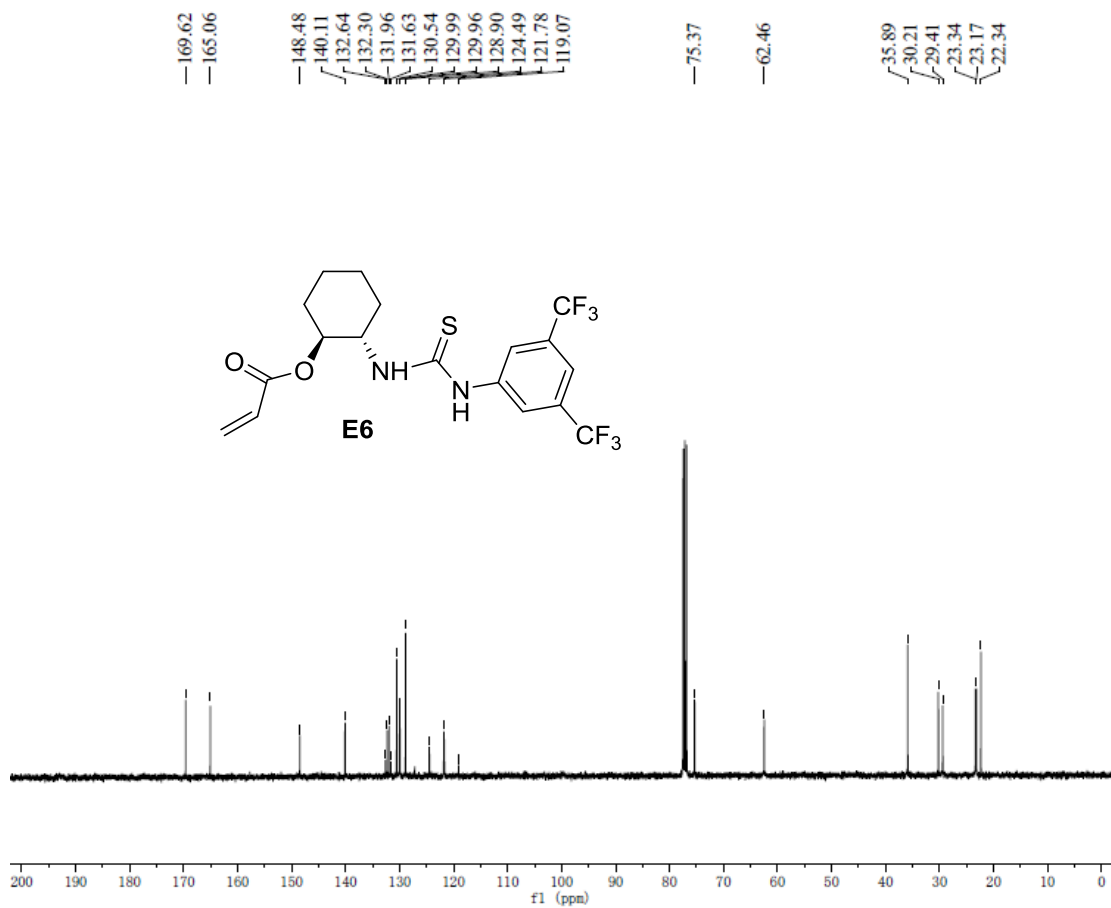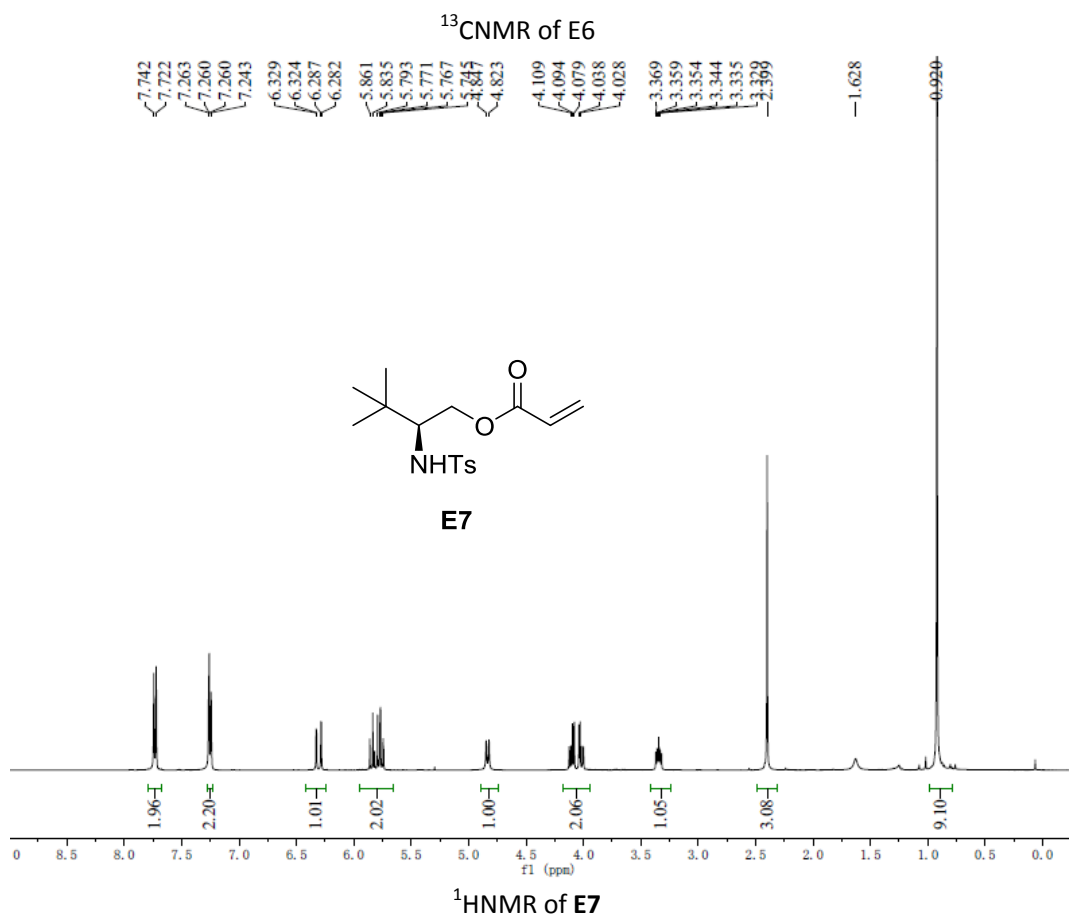

—166.07

✓143.31

✓138.79

✓131.31

✓129.76

✓127.88

✓127.07

✓63.87

✓61.09

✓34.54

✓27.07

✓21.62

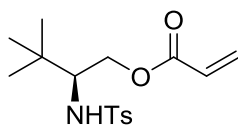

**E7**

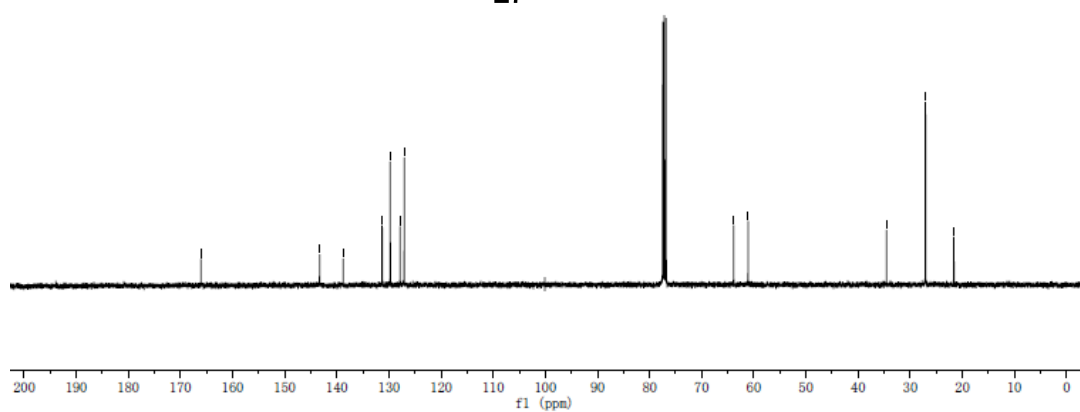

<sup>13</sup>CNMR of E7
